# Supplementary material for: Maintenance use of non-steroidal anti-inflammatory drugs and risk of gastrointestinal cancer in a nationwide population-based cohort study in Sweden
Source: PubMed Central journal article supplement — BMJ Open. 2018 Jul 7;8(7):e021869. doi: 10.1136/bmjopen-2018-021869 (PMC6042574; doi:10.1136/bmjopen-2018-021869), 2018-07-07
Supplement: bmjopen-2018-021869.draft_revisions.pdf [file bmjopen-2018-021869.draft_revisions.pdf]

# BMJ Open

BMJ Open is committed to open peer review. As part of this commitment we make the peer review history of every article we publish publicly available.

When an article is published we post the peer reviewers' comments and the authors' responses online. We also post the versions of the paper that were used during peer review. These are the versions that the peer review comments apply to.

The versions of the paper that follow are the versions that were submitted during the peer review process. They are not the versions of record or the final published versions. They should not be cited or distributed as the published version of this manuscript.

BMJ Open is an open access journal and the full, final, typeset and author-corrected version of record of the manuscript is available on our site with no access controls, subscription charges or pay-per-view fees (<http://bmjopen.bmj.com>).

If you have any questions on BMJ Open's open peer review process please email [info.bmjopen@bmj.com](mailto:info.bmjopen@bmj.com)

# BMJ Open

## Use of non-steroidal anti-inflammatory drugs and risk of gastrointestinal cancer

|                               |                                                                                                                                                                                                                    |
|-------------------------------|--------------------------------------------------------------------------------------------------------------------------------------------------------------------------------------------------------------------|
| Journal:                      | <i>BMJ Open</i>                                                                                                                                                                                                    |
| Manuscript ID                 | bmjopen-2018-021869                                                                                                                                                                                                |
| Article Type:                 | Research                                                                                                                                                                                                           |
| Date Submitted by the Author: | 23-Jan-2018                                                                                                                                                                                                        |
| Complete List of Authors:     | Brusselaers, Nele; Karolinska Institutet, Molecular medicine and Surgery Lagergren, Jesper; Karolinska Institutet, Department of Molecular medicine and Surgery; King's College London, Division of Cancer Studies |
| Keywords:                     | Gastrointestinal tumours < GASTROENTEROLOGY, chemoprevention, non-steroidal antiinflammatory drugs, aspirin, coxibs, cancer                                                                                        |
|                               |                                                                                                                                                                                                                    |

SCHOLARONE™  
Manuscripts

Review only

# Use of non-steroidal anti-inflammatory drugs and risk of gastrointestinal cancer

**Running title: NSAIDs and gastrointestinal cancer prevention**

**Authors:** Nele BRUSSELAERS<sup>1,2</sup>, MD MSc PhD, Jesper LAGERGREN<sup>3,4</sup>, MD PhD.

**Affiliations:**

<sup>1</sup> Centre for Translational Microbiome Research, Department of Microbiology, Tumor and Cell Biology, Karolinska Institutet, Karolinska Hospital, Stockholm, Sweden

<sup>2</sup> Science for Life Laboratory (SciLifeLab), Stockholm, Sweden

<sup>3</sup> Upper Gastrointestinal Surgery, Department of Molecular medicine and Surgery, Karolinska Institutet, Karolinska University Hospital, Stockholm, Sweden.

<sup>4</sup> Division of Cancer Studies, King's College London, United Kingdom.

**Correspondence and requests for reprints:** Dr. Nele Brusselaers, Centre for Translational Microbiome Research, Department of Microbiology, Tumor and Cell biology, Karolinska Institutet, Nobelsvag16, 171 77 Stockholm, Sweden.  
E-mail: Nele.Brusselaers@ki.se, Tel: +46 8 524 853 08

**Email addresses authors:** [nele.brusselaers@ki.se](mailto:nele.brusselaers@ki.se); [jesper.lagergren@ki.se](mailto:jesper.lagergren@ki.se)

**Word count: 3,649 words; Tables: 5, Figures: 0; supplement: 3**

## Structured summary (228 words)

**Objectives:** Aspirin and other non-steroidal anti-inflammatory drugs (NSAIDs) are potential candidates for chemoprevention of gastrointestinal cancer. We aimed to assess the association between contemporary NSAID use ( $\geq 180$  days) and gastrointestinal cancer.

**Design:** Nationwide Swedish population-based cohort study (2005-2012,

**Setting:** Sweden

**Participants:** All adults exposed to maintenance NSAIDs use (aspirin,  $n=783,870$ ; unselective NSAIDs,  $n=566,209$ , selective COX-2 inhibitors,  $n=17,948$ ) compared to the Swedish background population of the same age, sex and calendar period.

**Outcome measures:** the risk of different gastro-intestinal cancer types expressed as standardized incidence ratios (SIR) and 95% confidence intervals (CI), taking into account concurrent proton-pump-inhibitors (PPIs) and statins usage.

**Results:** The SIR for gastro-intestinal cancer for aspirin-use was 1.02 (95%CI 1.00-1.04), with clearly reduced risk for long-term users (SIR=0.31, 95%CI 0.30-0.33 for 5.5-7.7 years), and stronger protective effect for low-dose aspirin (SIR=0.86, 95% CI 0.85-0.88). Users of non-selective NSAIDs showed an overall decreased risk of gastrointestinal cancer (SIR=0.79, 95%CI 0.77-0.82), in particular for cancer of the stomach, colorectum and oesophagus, and the SIRs were further decreased among long-term users. Users of selective COX-2 inhibitors showed a SIR=0.89 (95%CI 0.73-1.09) for gastrointestinal cancers. Both aspirin and unselective NSAIDs users who also

1  
2  
3 were using PPIs, had higher risks for all gastrointestinal cancer types; and  
4  
5 lower risk if using statins.  
6

7 **Conclusion:** Long-term use of (low-dose) aspirin and non-selective NSAIDs  
8  
9 was associated with a decreased risk of all gastrointestinal cancer types.  
10

11  
12  
13 **Key words:** gastro-intestinal cancer, chemoprevention, non-steroidal anti-  
14  
15 inflammatory drugs, aspirin, coxibs, cancer, pharmaco-epidemiology.  
16  
17  
18  
19  
20  
21  
22  
23  
24  
25  
26  
27  
28  
29  
30  
31  
32  
33  
34  
35  
36  
37  
38  
39  
40  
41  
42  
43  
44  
45  
46  
47  
48  
49  
50  
51  
52  
53  
54  
55  
56  
57  
58  
59  
60

### Article summary: Strengths and limitations of this study

- Population-based and nationwide design based on contemporary use of aspirin and other non-steroidal anti-inflammatory drugs (NSAIDs) – resulting in sufficient power to assess less common types of gastrointestinal cancer, and different formulations of NSAIDs.
- Concurrent maintenance use of statins and proton pump inhibitors is assessed.
- This study is based on real-life user information because of the population-based design, which leads to inherent problems of confounding by indication and reverse causality which were taken into account in the design and analyses.
- The findings are standardized for age, sex – which are often described the major confounding factors in epidemiologic studies - and calendar time. Yet, other confounders could not be taken into account because the information was not available for the total background population.
- Exposure information is based on the Swedish Prescribed Drug Registry, which is initiated in July 2005 and has a complete nationwide coverage.

## Introduction

Inflammatory processes in tumour tissue are likely to contribute to tumour progression, immunosuppression and facilitate tumour growth, and cancer susceptibility and severity may also depend on different inflammatory responses.[1] Therefore, aspirin and other non-steroidal anti-inflammatory drugs (NSAIDs) are among the most promising candidates for chemoprevention of cancer, in particular tumours of the gastrointestinal tract. Despite the different indications for maintenance use of aspirin and non-aspirin NSAIDs, the underlying mechanisms of these medications are similar.[2 3] NSAIDs inhibit cyclo-oxygenase (COX), an enzyme responsible for the formation of thromboxane (a lipid acting as a vasoconstrictor, which also facilitates platelet aggregation) and prostaglandins (a messenger molecule in the inflammatory pathway); yet only aspirin permanently inhibits platelet formation.[4 5] There are 2 types of NSAIDs, inhibiting both COX-1 and COX-2, or only COX-2. COX-1 is expressed in most tissues regulating many physiological processes.[6] By inhibiting prostaglandin synthesis, NSAIDs compromise gastroduodenal defence mechanisms, including reducing blood flow and mucus and bicarbonate secretion, which may lead to dyspepsia and peptic ulcers, for which proton pump inhibitors (PPIs) are often prescribed as prevention or treatment.[5 6] COX-2 is expressed at sites of inflammation, and is the actual target of NSAIDs.[6] In contrast to non-selective COX-inhibitors (i.e. aspirin and most other NSAIDs), COX-2 selective inhibitors or coxibs are also weakly acidic, and therefore avoid substantial accumulation in (and damage of) the gastric mucosa.[6] Clinical studies have shown similar anti-inflammatory effects, a lower risk of

1  
2  
3 gastrointestinal toxicity, yet a higher risk of cardiovascular morbidity for COX-  
4 2 selective inhibitors compared to nonselective COX-inhibitors.[3 7] [8] Some  
5 of the older NSAIDs are “relatively selective COX-2 inhibitors”, i.e.  
6  
7

8 nabumetone, meloxicam, etodolac and nimesulide.[3]  
9

10  
11 However, epidemiological evidence to support a chemopreventive effect is still  
12  
13 limited, mainly because large numbers are needed with a long follow-up, in  
14  
15 particular for relatively rare cancer types. Meta-analyses have pooled the  
16  
17 evidence of the gastrointestinal cancer preventive potential of aspirin and  
18  
19 other NSAIDs.[9-14] A large meta-analysis[15] and another detailed scientific  
20  
21 assessment[16] concluded that a preventive effect on colorectal cancer was  
22  
23 especially pronounced in daily and long-term users (>5 years) in both  
24  
25 interventional and observational studies.[15 16] Yet, the included studies used  
26  
27 several different definitions of exposure, ranging from a single prescription of  
28  
29 aspirin to daily use for >5 years, with too few studies reporting stratified  
30  
31 analyses per dosage (or indication e.g. low dose anti-coagulants versus high  
32  
33 dose analgesics) to draw reliable conclusions (although low dose has been  
34  
35 recommended by individual studies).[15] The statistical power was too low to  
36  
37 identify associations with many other types of (gastro-intestinal) cancer, and  
38  
39 more, large original studies are needed to assess the potential preventive  
40  
41 effect of other NSAIDs.[15]  
42  
43  
44

45  
46 The role of PPI use on the association between NSAIDs with gastrointestinal  
47  
48 cancer is insufficiently understood yet increasingly investigated, with growing  
49  
50 evidence of carcinogenic and other long-term side-effects of PPIs.[17-20]  
51  
52  
53  
54  
55  
56  
57  
58  
59  
60



1  
2  
3 The objective of this study was to assess the association of aspirin and other  
4 NSAIDs on the risk of different gastrointestinal cancer types, while also  
5 assessing the potential influence of concomitant PPI use.  
6  
7  
8  
9  
10

## 11 **Material and Methods**

12  
13  
14 This nationwide Swedish population-based cohort study assessed the risk of  
15 gastrointestinal cancer in adult NSAIDs users compared to the risk in the  
16 entire Swedish background population of the corresponding sex, age and  
17 calendar year (7.1-7.6 million adults). [21] [21] [21] [21] [21] [21] [21] [21] [21]  
18 [21][21] Participants were enrolled during the study period from July 1, 2005  
19 (the start of the Swedish Prescribed Drug Registry) to December 31, 2012.  
20  
21  
22

23  
24  
25 The cohort members were followed up until the occurrence of any cancer  
26 (excluding non-melanoma skin cancer), death or December 31, 2012 (i.e. the  
27 end of data collection for the Swedish Cancer Registry), whichever occurred  
28 first. Individuals with a history of any cancer were excluded, as well as  
29 individuals with a cancer diagnosis within 12 months after inclusion (to avoid  
30 reverse causation). The unique 10-digit personal identity number, assigned to  
31 each Swedish resident, was used for identification of all participants and for  
32 linkages of their individual data between registries. This study was conducted  
33 according to a detailed and a-priori established study protocol.  
34  
35  
36  
37  
38  
39  
40  
41  
42  
43  
44  
45  
46  
47  
48

### 49 **Data collection**

50  
51 The data for the present study were derived from our Chemoprevention of  
52 cancer cohort. The study protocol conforms to the ethical guidelines of the  
53 1975 Declaration of Helsinki as reflected in a prior approval by the institution's  
54  
55  
56  
57  
58  
59  
60

1  
2  
3 human research committee, the Regional Ethical Review Board in Stockholm,  
4  
5 without need for informed consent (2014/1291-31/4, approved 27 AUG  
6  
7 2014)(see Supplement 1 and [22-24]). This data collection originates from the  
8  
9 nationwide complete Swedish Prescribed Drug Registry, and includes all  
10  
11 individuals residing in Sweden who have collected at least one dispensed  
12  
13 prescription of any commonly prescribed drug between July 1, 2005 and  
14  
15 December 31, 2014 (approximately 85% of all Swedish residents); with follow-  
16  
17 up for cancer until December 31, 2012. This cohort has been linked to two  
18  
19 other high-quality and complete nationwide Swedish registries, i.e. the  
20  
21 Swedish Cancer Registry (>96% completeness of all cancers, originated in  
22  
23 1961),[25] and the Swedish Causes of Death Registry (>99% completeness,  
24  
25 originated in 1952), by means of the personal identity number.  
26  
27  
28  
29  
30

### 31 **Exposures**

32  
33 Therapy with systemic NSAIDs was defined as at least 6 months ( $\geq 180$  days)  
34  
35 cumulative exposure during the study period. This was a cumulative exposure  
36  
37 based on the defined daily dosage (DDD) per prescribed package, which  
38  
39 takes into account the potency of the drug as well as the prescribed quantity.  
40  
41 Three main types of NSAIDs were categorized based on their mechanisms of  
42  
43 action (selective or non-selective COX inhibition) and drug class (aspirin or  
44  
45 non-aspirin NSAIDs) with corresponding Anatomical Therapeutic Chemical  
46  
47 classification codes (ATC): 1) aspirin (B01AC06, N02BA), 2) selective COX-2  
48  
49 inhibitors (coxibs, M01AH), and 3) non-selective non-aspirin NSAIDs  
50  
51 (remaining M01A codes). Individuals with  $\geq 180$  days of exposure to 2 or 3 of  
52  
53 these groups were excluded, so the 3 groups are mutually exclusive. Users of  
54  
55  
56  
57  
58  
59  
60

1  
2  
3 combination preparations including aspirin, i.e. with corticosteroid (M01BA03),  
4 PPIs (B01AC56), statins (C10BX), as well as preparations for local (oral) use  
5 (A01AD05) were also excluded.  
6  
7

8  
9 Additionally, the relatively selective NSAIDs, a subgroup of the non-selective  
10 NSAID users, containing meloxicam (M01AC06) and nabumetone  
11 (M01AX01), were also analysed separately. Aspirin users were also divided in  
12  
13 2 groups according to their ATC code ( $\geq 180$  days): low dose (B01AC06), and  
14 high dose aspirin (N02BA) (those using both for  $\geq 180$  days were  
15  
16 excluded).[26] High-dose aspirin (N02BA) and some other NSAIDs  
17  
18 (Diclofenac, M01AB05 and Ibuprofen, M01AE01) are also available over the  
19  
20 counter in Sweden, but they are sold in only small packages and at higher  
21  
22 prices per dose.[26 27] Thus, we can assume that maintenance users had  
23  
24 their doses prescribed, and were thus recorded in the present study.  
25  
26  
27  
28  
29  
30  
31  
32

### 33 **Outcomes**

34  
35 The outcome was a first gastrointestinal cancer diagnosis recorded in the  
36  
37 Swedish Cancer Registry according to the International Classification of  
38  
39 Diseases (ICD) 10<sup>th</sup> edition. Gastrointestinal cancers were categorized as  
40  
41 follows: any gastrointestinal cancer (C15-C26) or cancer of the oesophagus  
42  
43 (C15), stomach (C16), small bowel (C17), colorectum (C18-C21), liver (C22),  
44  
45 gallbladder or bile ducts (C23-24), or pancreas (C25). The category “other  
46  
47 gastrointestinal cancer” (C26) was not analysed separately. Additionally, the  
48  
49 most common histological tumour types were analysed separately:  
50  
51 adenocarcinoma (code 096) for oesophageal, gastric, gallbladder/biliary tract,  
52  
53 pancreas and colorectal cancer; squamous cell carcinoma (code 146) for  
54  
55  
56  
57  
58  
59  
60

oesophageal cancer; hepatocellular carcinoma (code 066) for liver cancer; and carcinoid (code 086) for small bowel cancer.

### ***Statistical analyses***

The relative risks of developing gastrointestinal cancer in individuals exposed to the drugs under study were standardized using the Swedish background population of the corresponding age, sex, and calendar period. Standardized incidence ratios (SIRs) and 95% confidence intervals (CIs) were calculated, while accounting for changes in age and calendar categories when calculating years of follow-up.[28] Follow-up time was counted from the dispense date of the first NSAID prescription to the date of a first cancer diagnosis, death, or the end of the study (31<sup>st</sup> December 2012), whichever occurred first. The expected incidence rates were calculated from cancer data recorded in the Swedish Cancer Registry and the age-stratified number of individuals per calendar year according to Statistics Sweden (Population Statistics). The overall SIR for gastrointestinal cancer was calculated, as well as SIRs for each anatomical location separately, including sub-analyses for the most common histological types. The analyses were also stratified for sex and age for each cancer type. Subgroup analyses were performed for high-dose and low-dose aspirin, users of relatively selective NSAIDs, NSAID use with concurrent PPI (A02BC) or statin (C10AA) use ( $\geq 180$  days) if the groups were sufficiently large. To assess the effect of PPI and statins, a multivariable Poisson regression model was fitted, adjusting for age at first prescription, sex and interaction between PPI and statins, and presented as incidence rate ratios (IRR) and 95%CI. The duration of the exposures was assessed by

1  
2  
3 dividing the total cumulative dosage (sum of DDDs per package) received  
4 before the cancer diagnosis into four equally sized groups (quartiles), yet their  
5 total follow-up time was taken into account for the analyses. There were no  
6 missing data on exposures, outcomes or confounding variables. Effect  
7 estimates were only reported when at least 5 individuals developed the  
8 outcome.  
9  
10  
11  
12  
13  
14  
15  
16  
17

### 18 ***Patient involvement***

19  
20 The Swedish patient organization for cancer of the esophagus, stomach, liver,  
21 and pancreas was involved in supporting the present study  
22 ([www.palema.org](http://www.palema.org)). The development of the research question and outcome  
23 measures were informed by patients' priorities, experience, and preferences.  
24 The results will be disseminated to study participants by means of patient  
25 organizations. Patients are thanked in the acknowledgements.  
26  
27  
28  
29  
30  
31  
32  
33  
34  
35

### 36 **Results**

37  
38 Among all 1,368,027 users of NSAIDs, there were 783,870 (57.3%) aspirin  
39 users, 566,209 (41.4%) non-selective NSAIDs users, and 17,948 (1.3%)  
40 COX-2 users (Table 1, Supplement 1). Aspirin users were more likely to be  
41 male (53.8%) and older than 70 years (54.9.2%), while non-selective NSAID  
42 users and COX-2 users were predominantly female (62.8% and 59.9%,  
43 respectively) and between 40 and 70 years of age (68.2% and 70.8%,  
44 respectively). Use of PPIs was found in 25.6%, 26.2%, and 31.2% of the  
45 aspirin users, non-selective NSAIDs users, and COX-2 users, respectively;  
46 and use of statins in 55.2%, 13.7% and 14.4%, respectively. The majority of  
47  
48  
49  
50  
51  
52  
53  
54  
55  
56  
57  
58  
59  
60

1  
2  
3 the population received their first prescription during the first half year of the  
4 study period (2005), 54.9% of aspirin users, and 42.5% of non-selective  
5 NSAIDs users (Supplement 2).  
6  
7  
8  
9

### 10 **Aspirin**

11  
12 As presented in Table 1, 10,969 (1.40%) aspirin users developed some type  
13 of gastrointestinal cancer during the follow-up. The most common cancer sites  
14 were colorectal (n=6,919; 0.88%), gastric (n=1,079; 0.14%), and pancreatic  
15 (n=1,114; 0.14%). There was no association with gastrointestinal cancer  
16 based on the overall SIRs for aspirin users (SIR=1.02, 95% CI 1.00-1.04)  
17 (Table 2). Shorter duration of use (<5.5 years) seemed to be associated with  
18 an increased risk for all gastro-intestinal cancers. Yet, longer duration of  
19 aspirin use was followed by a decreased SIR for gastrointestinal cancer  
20 (SIR=0.31, 95% CI 0.30-0.33 for those with an estimated use between 5.5-7.7  
21 years, and SIR=0.37, 95%CI 0.35-0.40 for >7.7 years) (Table 3) and long-  
22 term aspirin users had clearly decreased SIRs for each gastrointestinal  
23 cancer type (Table 3). The subgroup analyses including only the low-dosage  
24 aspirin users (N=668,305, 85.3% of the aspirin cohort) showed lower SIRs for  
25 all cancer locations, with significantly reduced risks for all locations except for  
26 oesophageal, gastric and liver cancer (Table 4).  
27  
28  
29  
30  
31  
32  
33  
34  
35  
36  
37  
38  
39  
40  
41  
42  
43  
44  
45  
46  
47

### 48 **Non-selective NSAIDs**

49  
50 Table 1 shows that 3,428 (0.61%) of the non-selective NSAID users  
51 developed cancer, mainly colorectal (n=2,017; 0.36%), pancreatic (n=490;  
52 0.09%), and gastric cancers (n=260; 0.05%). Overall, there was a decreased  
53  
54  
55  
56  
57  
58  
59  
60

1  
2  
3 risk of gastrointestinal cancer (SIR=0.79, 95%CI 0.77-0.82), and also for  
4  
5 gastric (SIR=0.70, 95% CI 0.62-0.80), colorectal (SIR=0.74, 95% CI 0.71-  
6  
7 0.77) and oesophageal (SIR=0.75, 95% CI 0.63-0.89) cancers analysed  
8  
9 separately (and their main histological subtypes) (Table 2). There was no  
10  
11 evidence of decreased SIRs for the other types of gastrointestinal cancer  
12  
13 types, although the effect sizes indicated a decreased SIR of small bowel and  
14  
15 liver cancer. Longer duration of use of non-selective NSAIDs was associated  
16  
17 with a decreased gastrointestinal cancer risk for all anatomical locations  
18  
19 (Table 3).  
20  
21  
22  
23

#### 24 ***Selective COX-2 inhibitors***

25  
26 Overall, 100 (0.56%) COX-2 users developed some type of gastrointestinal  
27  
28 cancer, predominantly colorectal (n=60; 0.33%), pancreatic (n=13; 0.07%),  
29  
30 gastric (n=7; 0.04%), and oesophageal cancers (n=7; 0.04%). There was  
31  
32 some evidence for a decreased risk of gastrointestinal cancer overall  
33  
34 (SIR=0.89, 95% CI 0.73-1.09), although not statistically significant. None of  
35  
36 the sub-analyses showed strong evidence for an association (Table 4).  
37  
38  
39  
40  
41

#### 42 ***Relatively selective NSAIDs***

43  
44 Among the non-selective NSAIDs users, 7,609 individuals used relatively  
45  
46 selective NSAIDs, of whom 74 (0.01%) developed cancer. There was no  
47  
48 evidence for an association with any of the gastrointestinal cancer locations  
49  
50 (Table 4).  
51  
52  
53

#### 54 ***Aspirin with PPIs or statins***

1  
2  
3 Users of aspirin with concomitant use of PPIs had higher SIRs for all  
4 gastrointestinal cancers compared to those not using PPIs, with all SIRs  
5 indicating an increased risk except for gallbladder cancer (Table 5). The SIRs  
6 were especially increased for gastric cancer (SIR=1.89; 95% CI 1.73-2.06)  
7 and oesophageal cancer (SIR=1.94; 95% CI 1.71-2.20). When using Poisson  
8 regression to compare aspirin users using PPIs directly with aspirin users not  
9 using PPIs (instead of using the background population as reference), the risk  
10 was increased for all gastrointestinal cancers (IRR=1.19, 95% CI 1.11-1.26),  
11 with significantly increased risks for oesophageal, gastric, small bowel, liver  
12 and pancreatic cancer (Supplement 3).  
13

14  
15 Among aspirin users exposed to statins, the SIRs were close to unity for each  
16 anatomical location (Table 5). When aspirin users using statins were directly  
17 compared with aspirin users not using statins, risks were decreased for all  
18 gastrointestinal cancers (IRR=0.81, 95% CI 0.77-0.85), with significant  
19 decreases for all cancer locations except for colorectal and pancreatic cancer  
20 (Supplement 3).  
21  
22  
23  
24  
25  
26  
27  
28  
29  
30  
31  
32  
33  
34  
35  
36  
37  
38  
39  
40  
41

### 42 ***Non-selective NSAIDs with PPIs or statins***

43  
44 In users of non-selective NSAIDs on therapy with PPIs, the SIRs were  
45 increased for all gastrointestinal cancer types (and again higher than among  
46 those not using PPIs), except for colorectal cancer (Table 5). When users of  
47 non-selective NSAIDs using PPIs were directly compared with those not using  
48 PPIs, risks were increased for all gastrointestinal cancers (IRR=1.61, 95% CI  
49 1.49-1.74), and each individual cancer location except for gallbladder cancer  
50  
51  
52  
53  
54  
55  
56  
57  
58  
59  
60



1  
2  
3 (Supplement 3). Among non-selective NSAIDs users using statins, the SIRs  
4  
5 were lower than among all users of non-selective NSAIDs, and significantly  
6  
7 reduced for oesophageal, gastric and colorectal cancer. When users of non-  
8  
9 selective NSAIDs using statins were directly compared with those not using  
10  
11 statins, risks were decreased for all gastrointestinal cancers (IRR=0.86, 95%  
12  
13 CI 0.76-0.96), yet not significant for the individual cancer locations  
14  
15  
16 (Supplement 3).  
17  
18  
19

## 20 **Discussion**

21  
22 This study on contemporary use of NSAIDs showed a decreased risk of all  
23  
24 types of gastrointestinal cancer among long-term users of aspirin (>5.5 years)  
25  
26 and non-selective NSAIDs users even for shorter duration of use (>0.7 years).  
27  
28 Long-term users of non-selective NSAIDs were at a particularly decreased  
29  
30 risk for gastric, oesophageal, and colorectal cancers. These seemingly  
31  
32 protective associations might be counteracted by concomitant PPI therapy,  
33  
34 and enhanced by concomitant statin use.  
35  
36  
37  
38  
39

40  
41 The main strengths of this study are the population-based design and large  
42  
43 sample size, including all adults residing in Sweden during the study period,  
44  
45 which enabled separate analyses for contemporary use of different types of  
46  
47 NSAIDs, and evaluation of less common types of gastrointestinal cancer  
48  
49 which could not be assessed previously because of insufficient power, in  
50  
51 particular for non-aspirin NSAIDs. Other advantages include the complete  
52  
53 follow-up and accurate censoring for mortality. The data on the exposures  
54  
55 (medications) and outcomes (gastrointestinal cancers) were highly accurate  
56  
57  
58  
59  
60

1  
2  
3 due to the validity and completeness of the Swedish registries, eliminating  
4 recall bias.  
5  
6  
7  
8

9 Although our findings for aspirin are largely consistent with the literature, that  
10 the protective effect is only seen after 5 years, reverse causation, confounding  
11 and/or bias appear to influence the aspirin analyses because of the apparent  
12 initial increased risk of cancer among short-term users. By excluding all  
13 individuals diagnosed with cancer within a year after enrolment, and only  
14 including those with a minimal accumulated duration of use of 6 months, the  
15 risk of reverse causation should be reduced. Yet, our results indicate that  
16 those with an estimated duration shorter than 5 years have an apparent  
17 increased risk, which might be because they take aspirin because of cancer-  
18 related pain or thrombotic events – indicating confounding by indication and  
19 reverse causation among the group with the shortest exposure time, an effect  
20 which could not have been detected in intervention trials or in case-control  
21 studies with a study-design-inherent more restrictive selection of study  
22 participants.[15 29] As previous studies reported, 15-20% of cancer patients  
23 have thrombotic complications during the course of the disease (often as early  
24 manifestation of an occult malignancy),[30] yet these complications (e.g. deep  
25 venous thrombosis) are more likely to be treated with anti-coagulants than  
26 aspirin. However, when only looking at those exclusively using low-dose  
27 aspirin for  $\geq 180$  days, i.e. the platelet aggregation inhibitors, the protective  
28 effects were also visible in the overall analyses non taking into account  
29 duration, with SIR=0.86 (95%CI 0.85-0.88). This indicates that the apparent  
30 increased risks are mainly because of the small group using aspirin as  
31  
32  
33  
34  
35  
36  
37  
38  
39  
40  
41  
42  
43  
44  
45  
46  
47  
48  
49  
50  
51  
52  
53  
54  
55  
56  
57  
58  
59  
60

1  
2  
3 analgesic (high dose), which shows it is important to distinguish between both  
4  
5 groups of aspirin-use. Reverse causality seems to be less of a problem for  
6  
7 other NSAIDs users, although these may be used as analgesics.[31] Yet,  
8  
9 individuals using NSAIDs may be at a lower a-priori risk of developing gastro-  
10  
11 intestinal cancer, because individuals with upper gastro-intestinal symptoms  
12  
13 are less likely to be chronic NSAIDs users due to the risk of gastro-intestinal  
14  
15 side-effects.

16  
17 Especially for aspirin users (with a high cardiovascular mortality), death is a  
18  
19 competing risk for the development of cancer, reducing the number at risk to  
20  
21 develop cancer. Therefore, we censored follow-up time at time of death. In  
22  
23 this cohort the standardised mortality risks were 9.64 (95%CI 9.60-9.69) for  
24  
25 aspirin users and 2.08 (95% CI 2.05-2.11) for non-selective non-aspirin  
26  
27 NSAIDs users indeed showing a higher risk of death competing with the risk  
28  
29 of cancer.  
30  
31

32  
33  
34  
35 Another limitation is potential confounding, e.g. by socio-economic status,  
36  
37 dietary factors, obesity, tobacco smoking, and alcohol consumption, which  
38  
39 could not be taken into account since such information was not available for  
40  
41 the total background population. However, we adjusted for age, sex and  
42  
43 calendar period. We may have incomplete exposure ascertainment (and  
44  
45 underestimation of duration of use) for part of our cohort since no information  
46  
47 was available on prescriptions before July 2005 or over-the-counter use. Yet,  
48  
49 potential long-term (protective) effects may be expected to decrease gradually  
50  
51 yet significantly after treatment cessation, reducing the potential effect of  
52  
53 misclassification on our results due to exposure before 2005. We used the  
54  
55  
56  
57  
58  
59  
60

1  
2  
3 minimal exposure criterion of 180 days to exclude occasional users who are  
4 more likely to obtain their NSAIDs over-the-counter, so at a higher price. We  
5 did not have data on used daily dosage or duration of use, and used a proxy  
6 variable for duration based on accumulation of the average DDDs per  
7 package. This explains why some aspirin users had an estimated exposure  
8 time longer than the duration of follow-up, indicating a high daily dose. The  
9 high variability in actual and estimated administered dosage also hindered  
10 assessment of recency of use. Some previous studies subdivided aspirin use  
11 into “low dose” and “high dose” based on prescribed dosages (e.g. <75  
12 mg/day[32] or <100 mg/day[14]), but since we did not have information on the  
13 number of prescribed pills per day, and different dosages could have been  
14 prescribed during the study period, we used the definition based on ATC  
15 coding and assessed the estimated duration of use, with the additional  
16 advantage that the low-dose aspirin was only available on prescription. This  
17 should also be a more accurate reflection of duration of use than the number  
18 of prescriptions.[9] In our study, the DDD per package could range from <5 to  
19 500 (for other NSAIDs) or 1000 (for aspirin), which illustrates the variation  
20 between prescriptions. Since 1.4 million individuals were exposed to NSAIDs  
21 ( $\geq 180$  days), i.e. one fifth of the adult population in Sweden, our results are  
22 likely to be diluted since we compared them with the total background  
23 population. Yet, despite this dilution the associations among long-term users  
24 were strongly decreased.

25  
26  
27  
28  
29  
30  
31  
32  
33  
34  
35  
36  
37  
38  
39  
40  
41  
42  
43  
44  
45  
46  
47  
48  
49  
50  
51  
52 Compared to previous studies, this study was better powered to separately  
53 analyses different gastrointestinal cancers and types of NSAIDs.[33] The  
54  
55  
56  
57  
58  
59  
60

1  
2  
3 above mentioned meta-analysis[15] identified only 2 cohort studies including  
4  
5 over 100,000 individuals assessing colorectal cancer risk among aspirin-  
6  
7 users.[34 35] Even our exposed groups for aspirin and non-selective NSAIDs  
8  
9 alone were 5-7 times larger than earlier large studies. The decrease in  
10  
11 gastrointestinal cancer risk became evident only after longer exposure, which  
12  
13 has also been shown in previous research,[15 36] and is biologically plausible  
14  
15 given the expected time latency for (hindering) cancer progression.  
16  
17

18  
19  
20 The higher risk among aspirin and other NSAID users also using PPIs should  
21  
22 be interpreted with some caution. PPIs are often prescribed for  
23  
24 gastroesophageal reflux and peptic ulcers, which are risk factors for  
25  
26 oesophageal and gastric cancer, respectively. Therefore, a higher cancer risk  
27  
28 was expected for those locations, yet not for the other gastrointestinal cancer  
29  
30 types. PPIs can also be used to prevent peptic ulcers in users of aspirin and  
31  
32 other NSAIDs, usually in individuals without any gastro-intestinal morbidity.  
33  
34

35 Another study of our group based on the same source cohort,[24] investigated  
36  
37 the risk of gastric cancer among PPI maintenance users, which suggested an  
38  
39 increased risk in all indication groups for PPI (including those without  
40  
41 gastrointestinal symptoms); which also supports a potential independent role  
42  
43 for PPI in carcinogenesis as also suggested recently by other groups.[37 38]  
44  
45 Together with a potential increased risk of mortality related to long-term PPI  
46  
47 use,[39] we believe a more careful approach should be considered when  
48  
49 prescribing PPIs to prevent gastrointestinal complications in long-term  
50  
51 NSAIDs users. Yet, the risk for gastrointestinal complications such as  
52  
53 bleeding should be assessed on an individual bases based on other research  
54  
55  
56  
57  
58  
59  
60

1  
2  
3 investigating shorter-term effects.[40] Before considering implementing aspirin  
4 or other NSAIDs as wide-spread intervention, safety, in particular considering  
5 long-term use, needs to be considered, with previous research tending  
6 towards a “favourable benefit harm-profile” despite an excess risk of  
7 bleeding.[41]  
8  
9  
10  
11  
12

13  
14  
15 To conclude, this large Swedish nationwide and population-based cohort  
16 study on contemporary and long-term use of NSAIDs indicates a strongly  
17 protective effect of long-term use of both (low-dose) aspirin and other non-  
18 selective NSAIDs on gastrointestinal cancer development.  
19  
20  
21  
22  
23

24  
25  
26 **Acknowledgements:** We are grateful to all thousands of patients, physicians  
27 and healthcare staff members who contributed to the data collection, and to  
28 the Swedish National Board of Health and Welfare that collected the data.  
29  
30  
31  
32

33  
34  
35 **Authors' contributions:** NB is the submission guarantor. NB and JL had full  
36 access to all the data in the study and take responsibility for the integrity of  
37 the data and the accuracy of the data analysis. NB conducted and is  
38 responsible for the data-analysis. Literature search: NB; Design of the study:  
39 both authors; Data collection and preparation for analyses: NB; Data analysis:  
40 NB; Data interpretation: both authors; Writing of first draft: NB, revised and  
41 approved by both authors.  
42  
43  
44  
45  
46  
47  
48  
49

50  
51  
52 **Funding:** This work was supported by SFO epidemiology (Karolinska  
53 Institutet, junior investigator award NB), Swedish Research Council (839-  
54  
55  
56  
57

1  
2  
3 2008-7496), Swedish Cancer Society (CAN 2015/460). These funding  
4  
5 sources had no role in the design and conduct of the study; collection,  
6  
7 management, analysis, and interpretation of the data; and preparation,  
8  
9 review, or approval of the manuscript.  
10

11  
12  
13 **Competing interests:** none  
14

15  
16 **Data sharing statement:** We are willing to share data upon request after  
17  
18 ethics approval has been approved by the relevant committee and the  
19  
20 governmental agencies that maintain the data.  
21  
22  
23  
24  
25  
26  
27  
28  
29  
30  
31  
32  
33  
34  
35  
36  
37  
38  
39  
40  
41  
42  
43  
44  
45  
46  
47  
48  
49  
50  
51  
52  
53  
54  
55  
56  
57  
58  
59  
60

## References

1. Balkwill F, Mantovani A. Inflammation and cancer: back to Virchow? *Lancet* 2001;**357**(9255):539-45 doi: 10.1016/s0140-6736(00)04046-0[published Online First: Epub Date]].
2. Simon LS, Yocum D. New and future drug therapies for rheumatoid arthritis. *Rheumatology (Oxford)* 2000;**39 Suppl 1**:36-42
3. Yang M, Wang HT, Zhao M, et al. Network Meta-Analysis Comparing Relatively Selective COX-2 Inhibitors Versus Coxibs for the Prevention of NSAID-Induced Gastrointestinal Injury. *Medicine* 2015;**94**(40):e1592 doi: 10.1097/MD.0000000000001592[published Online First: Epub Date]].
4. Sjodahl R. Nonsteroidal anti-inflammatory drugs and the gastrointestinal tract. Extent, mode, and dose dependence of anticancer effects. *Am J Med* 2001;**110**(1a):66s-69s
5. Huntjens DR, Danhof M, Della Pasqua OE. Pharmacokinetic-pharmacodynamic correlations and biomarkers in the development of COX-2 inhibitors. *Rheumatology (Oxford)* 2005;**44**(7):846-59 doi: 10.1093/rheumatology/keh627[published Online First: Epub Date]].
6. Bjarnason I, Thjodleifsson B. Gastrointestinal toxicity of non-steroidal anti-inflammatory drugs: the effect of nimesulide compared with naproxen on the human gastrointestinal tract. *Rheumatology (Oxford)* 1999;**38 Suppl 1**:24-32
7. Nissen SE, Yeomans ND, Solomon DH, et al. Cardiovascular Safety of Celecoxib, Naproxen, or Ibuprofen for Arthritis. *N Engl J Med* 2016;**375**(26):2519-29 doi: 10.1056/NEJMoa1611593[published Online First: Epub Date]].
8. Bakhriansyah M, Souverein PC, de Boer A, et al. Gastrointestinal toxicity among patients taking selective COX-2 inhibitors or conventional NSAIDs, alone or combined with proton pump inhibitors: a case-control study. *Pharmacoepidemiol Drug Saf* 2017 doi: 10.1002/pds.4183[published Online First: Epub Date]].



- 1  
2  
3 9. Capurso G, Schunemann HJ, Terrenato I, et al. Meta-analysis: the use of  
4 non-steroidal anti-inflammatory drugs and pancreatic cancer risk for  
5 different exposure categories. *Aliment Pharmacol Ther*  
6 2007;**26**(8):1089-99 doi: 10.1111/j.1365-2036.2007.03495.x[published  
7 Online First: Epub Date]].  
8  
9
- 10  
11 10. Tian W, Zhao Y, Liu S, et al. Meta-analysis on the relationship between  
12 nonsteroidal anti-inflammatory drug use and gastric cancer. *Eur J*  
13 *Cancer Prev* 2010;**19**(4):288-98 doi:  
14 10.1097/CEJ.0b013e328339648c[published Online First: Epub Date]].  
15
- 16  
17 11. Yang P, Zhou Y, Chen B, et al. Aspirin use and the risk of gastric cancer:  
18 a meta-analysis. *Dig Dis Sci* 2010;**55**(6):1533-9 doi: 10.1007/s10620-  
19 009-0915-0[published Online First: Epub Date]].  
20
- 21  
22 12. Ye X, Fu J, Yang Y, et al. Dose-risk and duration-risk relationships  
23 between aspirin and colorectal cancer: a meta-analysis of published  
24 cohort studies. *PLoS One* 2013;**8**(2):e57578 doi:  
25 10.1371/journal.pone.0057578[published Online First: Epub Date]].  
26
- 27  
28 13. Ye X, Fu J, Yang Y, et al. Frequency-risk and duration-risk relationships  
29 between aspirin use and gastric cancer: a systematic review and meta-  
30 analysis. *PLoS One* 2013;**8**(7):e71522 doi:  
31 10.1371/journal.pone.0071522[published Online First: Epub Date]].  
32
- 33  
34 14. Cui XJ, He Q, Zhang JM, et al. High-dose aspirin consumption contributes  
35 to decreased risk for pancreatic cancer in a systematic review and  
36 meta-analysis. *Pancreas* 2014;**43**(1):135-40 doi:  
37 10.1097/MPA.0b013e3182a8d41f[published Online First: Epub Date]].  
38
- 39  
40 15. Algra AM, Rothwell PM. Effects of regular aspirin on long-term cancer  
41 incidence and metastasis: a systematic comparison of evidence from  
42 observational studies versus randomised trials. *Lancet Oncol*  
43 2012;**13**(5):518-27 doi: 10.1016/S1470-2045(12)70112-2[published  
44 Online First: Epub Date]].  
45
- 46  
47 16. Sutcliffe P, Connock M, Gurung T, et al. Aspirin for prophylactic use in the  
48 primary prevention of cardiovascular disease and cancer: a systematic  
49 review and overview of reviews. *Health Technol Assess* 2013;**17**(43):1-  
50 253 doi: 10.3310/hta17430[published Online First: Epub Date]].  
51  
52  
53  
54  
55  
56  
57  
58  
59  
60

- 1  
2  
3 17. Imhann F, Bonder MJ, Vich Vila A, et al. Proton pump inhibitors affect the  
4 gut microbiome. *Gut* 2016;**65**(5):740-8 doi: 10.1136/gutjnl-2015-  
5 310376[published Online First: Epub Date]].
- 6  
7  
8 18. Alsalahi O, Dobrian AD. Proton Pump Inhibitors: The Culprit for Barrett's  
9 Esophagus? *Front Oncol* 2014;**4**:373 doi:  
10 10.3389/fonc.2014.00373[published Online First: Epub Date]].
- 11  
12  
13 19. Kia L, Kahrilas PJ. Therapy: Risks associated with chronic PPI use -  
14 signal or noise? *Nat Rev Gastroenterol Hepatol* 2016 doi:  
15 10.1038/nrgastro.2016.44[published Online First: Epub Date]].
- 16  
17  
18 20. Poulsen AH, Christensen S, McLaughlin JK, et al. Proton pump inhibitors  
19 and risk of gastric cancer: a population-based cohort study. *Br J*  
20 *Cancer* 2009;**100**(9):1503-7 doi: 10.1038/sj.bjc.6605024[published  
21 Online First: Epub Date]].
- 22  
23  
24 21. Statistics Sweden - Statistical Database Population Statistics (accessed  
25 06 April 2016) <http://www.statistikdatabasen.scb.se/>. Secondary  
26 Statistics Sweden - Statistical Database Population Statistics  
27 (accessed 06 April 2016) <http://www.statistikdatabasen.scb.se/>.  
28 <http://www.statistikdatabasen.scb.se/>.
- 29  
30  
31  
32 22. Sadr-Azodi O, Konings P, Brusselaers N. Menopausal hormone therapy  
33 and pancreatic cancer risk in women: a population-based matched  
34 cohort study. *United European gastroenterology journal*  
35 2017;**5**(8):1123-28 doi: 10.1177/2050640617702060[published Online  
36 First: Epub Date]].
- 37  
38  
39  
40 23. Ma Y, Brusselaers N. Maintenance use of aspirin or other non-steroidal  
41 anti-inflammatory drugs (NSAIDs) and prostate cancer risk. *Prostate*  
42 *cancer and prostatic diseases* 2017 doi: 10.1038/s41391-017-0021-  
43 x[published Online First: Epub Date]].
- 44  
45  
46  
47 24. Brusselaers N, Wahlin K, Engstrand L, et al. Maintenance therapy with  
48 proton pump inhibitors and risk of gastric cancer: a nationwide  
49 population-based cohort study in Sweden. *BMJ Open*  
50 2017;**7**(10):e017739 doi: 10.1136/bmjopen-2017-017739[published  
51 Online First: Epub Date]].
- 52  
53  
54  
55  
56  
57  
58  
59  
60

- 1  
2  
3 25. Barlow L, Westergren K, Holmberg L, et al. The completeness of the  
4 Swedish Cancer Register: a sample survey for year 1998. *Acta Oncol*  
5 2009;**48**(1):27-33 doi: 902131375 [pii]  
6 10.1080/02841860802247664[published Online First: Epub Date]].  
7  
8 26. FASS (Farmaceutiska specialiteter i Sverige/ Pharmaceutical specialities in  
9 Sweden), 2015.  
10  
11 27. Läkemedelsverket (Medical Products Agency): Over-the-counter (OTC).  
12 Secondary Läkemedelsverket (Medical Products Agency): Over-the-  
13 counter (OTC) 2016.  
14 <https://lakemedelsverket.se/english/product/Medicinal-products/OTC/>.  
15  
16 28. Breslow N, Day N. *Statistical Methods in Cancer Research: The design*  
17 *and analysis of cohort studies*. Lyon, 1987.  
18  
19 29. Rothwell PM, Wilson M, Elwin CE, et al. Long-term effect of aspirin on  
20 colorectal cancer incidence and mortality: 20-year follow-up of five  
21 randomised trials. *Lancet* 2010;**376**(9754):1741-50 doi:  
22 10.1016/S0140-6736(10)61543-7[published Online First: Epub Date]].  
23  
24 30. Kyriazi V, Theodoulou E. Assessing the risk and prognosis of thrombotic  
25 complications in cancer patients. *Arch Pathol Lab Med*  
26 2013;**137**(9):1286-95 doi: 10.5858/arpa.2012-0490-RA[published  
27 Online First: Epub Date]].  
28  
29 31. Mercadante S. The use of anti-inflammatory drugs in cancer pain. *Cancer*  
30 *Treat Rev* 2001;**27**(1):51-61 doi: 10.1053/ctrv.2000.0192[published  
31 Online First: Epub Date]].  
32  
33 32. Din FV, Theodoratou E, Farrington SM, et al. Effect of aspirin and NSAIDs  
34 on risk and survival from colorectal cancer. *Gut* 2010;**59**(12):1670-9  
35 doi: 10.1136/gut.2009.203000[published Online First: Epub Date]].  
36  
37 33. Bosetti C, Rosato V, Gallus S, et al. Aspirin and cancer risk: a quantitative  
38 review to 2011. *Ann Oncol* 2012;**23**(6):1403-15 doi:  
39 10.1093/annonc/mds113[published Online First: Epub Date]].  
40  
41 34. Jacobs EJ, Thun MJ, Bain EB, et al. A large cohort study of long-term  
42 daily use of adult-strength aspirin and cancer incidence. *J Natl Cancer*  
43 *Inst* 2007;**99**(8):608-15 doi: 10.1093/jnci/djk132[published Online First:  
44 Epub Date]].  
45  
46  
47  
48  
49  
50  
51  
52  
53  
54  
55  
56  
57  
58  
59  
60

- 1  
2  
3 35. Smalley W, Ray WA, Daugherty J, et al. Use of nonsteroidal anti-  
4 inflammatory drugs and incidence of colorectal cancer: a population-  
5 based study. *Arch Intern Med* 1999;**159**(2):161-6  
6  
7  
8 36. Cao Y, Nishihara R, Wu K, et al. Population-wide Impact of Long-term  
9 Use of Aspirin and the Risk for Cancer. *JAMA Oncol* 2016;**2**(6):762-9  
10 doi: 10.1001/jamaoncol.2015.6396[published Online First: Epub Date]].  
11  
12 37. Cheung KS, Chan EW, Wong AYS, et al. Long-term proton pump  
13 inhibitors and risk of gastric cancer development after treatment for  
14 *Helicobacter pylori*: a population-based study. *Gut* 2018;**67**(1):28-35  
15 doi: 10.1136/gutjnl-2017-314605[published Online First: Epub Date]].  
16  
17 38. Niikura R, Hayakawa Y, Hirata Y, et al. Long-term proton pump inhibitor  
18 use is a risk factor of gastric cancer after treatment for *Helicobacter*  
19 *pylori*: a retrospective cohort analysis. *Gut* 2017 doi: 10.1136/gutjnl-  
20 2017-315710[published Online First: Epub Date]].  
21  
22 39. Xie Y, Bowe B, Li T, et al. Risk of death among users of Proton Pump  
23 Inhibitors: a longitudinal observational cohort study of United States  
24 veterans. *BMJ Open* 2017;**7**(6):e015735 doi: 10.1136/bmjopen-2016-  
25 015735[published Online First: Epub Date]].  
26  
27 40. Li L, Geraghty OC, Mehta Z, et al. Age-specific risks, severity, time  
28 course, and outcome of bleeding on long-term antiplatelet treatment  
29 after vascular events: a population-based cohort study. *Lancet*  
30 2017;**390**(10093):490-99 doi: 10.1016/s0140-6736(17)30770-  
31 5[published Online First: Epub Date]].  
32  
33 41. Cuzick J, Thorat MA, Bosetti C, et al. Estimates of benefits and harms of  
34 prophylactic use of aspirin in the general population. *Ann Oncol*  
35 2015;**26**(1):47-57 doi: 10.1093/annonc/mdu225[published Online First:  
36 Epub Date]].  
37  
38  
39  
40  
41  
42  
43  
44  
45  
46  
47  
48  
49  
50  
51  
52  
53  
54  
55  
56  
57  
58  
59  
60

**Table 1: Characteristics of the study cohort on therapy with aspirin, selective cyclo-oxygenase-2 (COX-2) inhibitors, and non-selective non-steroidal anti-inflammatory drug (NSAIDs).**

|                                        | <b>Aspirin only</b> | <b>Non-selective non-aspirin NSAIDs</b> | <b>Selective COX-2 inhibitors</b> |
|----------------------------------------|---------------------|-----------------------------------------|-----------------------------------|
|                                        | <i>Number (%)</i>   | <i>Number (%)</i>                       | <i>Number (%)</i>                 |
| Total                                  | 783,870             | 566,209                                 | 17,948                            |
| Sex                                    |                     |                                         |                                   |
| <i>Men</i>                             | 421,609 (53.8)      | 210,705 (37.2)                          | 7,201 (40.1)                      |
| <i>Women</i>                           | 362,261 (46.2)      | 355,504 (62.8)                          | 10,747 (59.9)                     |
| Age at first prescription              |                     |                                         |                                   |
| <40 years                              | 12,189 (1.6)        | 110,592 (19.5)                          | 2,720 (15.2)                      |
| 40-49 years                            | 32,743 (4.2)        | 125,977 (22.3)                          | 3,849 (21.5)                      |
| 50-59 years                            | 108,683 (13.9)      | 146,981 (26.0)                          | 4,941 (27.5)                      |
| 60-69 years                            | 200,154 (25.5)      | 112,682 (19.9)                          | 3,914 (21.8)                      |
| ≥70 years                              | 430,101 (54.9)      | 69,977 (12.4)                           | 2,524 (14.1)                      |
| Calendar period at first prescription  |                     |                                         |                                   |
| 2005-2006                              | 557,023 (71.1)      | 387,443 (68.4)                          | 10,393 (57.9)                     |
| 2007-2009                              | 156,790 (20.0)      | 145,208 (25.7)                          | 5,500 (30.6)                      |
| 2010-2012                              | 70,057 (8.9)        | 33,558 (5.9)                            | 2,055 (11.5)                      |
| Proton pump inhibitors use (≥180 days) |                     |                                         |                                   |
| <i>yes</i>                             | 200,828 (25.6)      | 148,586 (26.2)                          | 5,602 (31.2)                      |
| <i>no</i>                              | 583,042 (74.4)      | 417,623 (73.8)                          | 12,346 (68.8)                     |
| Statins use (≥180 days)                |                     |                                         |                                   |
| <i>yes</i>                             | 432,996 (55.2)      | 77,514 (13.7)                           | 2,589 (14.4)                      |
| <i>no</i>                              | 350,874 (44.8)      | 488,695 (86.3)                          | 15,359 (85.6)                     |
| Gastrointestinal cancer                | 10,969 (1.40)       | 3,428 (0.61)                            | 100 (0.56)                        |
| Oesophageal cancer                     | 539 (0.07)          | 134 (0.02)                              | 7 (0.04)                          |
| <i>Adenocarcinoma</i>                  | 319 (0.04)          | 75 (0.01)                               | 4 (0.02)                          |
| <i>Squamous cell carcinoma</i>         | 203 (0.03)          | 50 (0.01)                               | 2 (0.01)                          |
| Gastric cancer                         | 1,079 (0.14)        | 260 (0.05)                              | 7 (0.04)                          |
| <i>Adenocarcinoma</i>                  | 949 (0.12)          | 212 (0.04)                              | 3 (0.02)                          |
| Small bowel cancer                     | 253 (0.03)          | 94 (0.02)                               | 5 (0.03)                          |
| <i>Carcinoid</i>                       | 122 (0.02)          | 43 (0.01)                               | 2 (0.01)                          |
| Colorectal cancer                      | 6,919 (0.88)        | 2,017 (0.36)                            | 60 (0.33)                         |
| <i>Adenocarcinoma</i>                  | 6,608 (0.84)        | 1,887 (0.33)                            | 59 (0.33)                         |
| Liver cancer                           | 645 (0.08)          | 232 (0.04)                              | 3 (0.02)                          |
| <i>Hepatocellular carcinoma</i>        | 358 (0.05)          | 100 (0.02)                              | 1 (0.01)                          |
| Gallbladder and biliary tract cancer   | 385 (0.05)          | 190 (0.03)                              | 5 (0.03)                          |
| <i>Adenocarcinoma</i>                  | 288 (0.04)          | 149 (0.03)                              | 2 (0.01)                          |
| Pancreatic cancer                      | 1,114 (0.14)        | 490 (0.09)                              | 13 (0.07)                         |
| <i>Adenocarcinoma</i>                  | 835 (0.11)          | 402 (0.07)                              | 11 (0.06)                         |

|   |                                       |             |             |             |
|---|---------------------------------------|-------------|-------------|-------------|
| 1 | Other gastrointestinal cancer         | 35 (0.00)   | 11 (0.00)   | 0 (0.00)    |
| 2 | <hr/>                                 |             |             |             |
| 3 | Duration of follow-up in person-years |             |             |             |
| 4 | <i>Total</i>                          | 3,776,237   | 3,376,275   | 82,733      |
| 5 | <i>Mean (standard deviation)</i>      | 4.82 (2.40) | 5.96 (1.67) | 4.61 (2.21) |
| 6 | <hr/>                                 |             |             |             |

For peer review only

**Table 2: The risk of different types of gastrointestinal cancer (and the major histological subtype) among users of aspirin and non-aspirin non-steroidal anti-inflammatory drugs (NSAIDs), expressed as standardized incidence ratios (SIRs) and 95% confidence intervals (CIs) and stratified by age and sex.**

|                                | Aspirin users (n=783,870) |                         | Non-selective non-aspirin NSAIDs users (n=566,209) |                         |
|--------------------------------|---------------------------|-------------------------|----------------------------------------------------|-------------------------|
|                                | Number of cases           | SIRS (95% CI)           | Number of cases                                    | SIRS (95% CI)           |
| <b>Gastrointestinal cancer</b> | <b>10,969</b>             | <b>1.02 (1.00-1.04)</b> | <b>3,428</b>                                       | <b>0.79 (0.77-0.82)</b> |
| <i>Men</i>                     | 6,659                     | 1.24 (1.21-1.27)        | 1,390                                              | 0.78 (0.74-0.82)        |
| <i>Women</i>                   | 4,310                     | 0.99 (0.96-1.02)        | 2,038                                              | 0.81 (0.77-0.84)        |
| 18-39 years                    | 3                         | -                       | 14                                                 | 0.59 (0.32-0.99)        |
| 40-49 years                    | 20                        | 0.70 (0.43-1.08)        | 116                                                | 0.67 (0.55-0.81)        |
| 50-59 years                    | 408                       | 1.13 (1.03-1.25)        | 423                                                | 0.61 (0.55-0.67)        |
| 60-69 years                    | 2,286                     | 1.13 (1.08-1.18)        | 1,074                                              | 0.71 (0.67-0.75)        |
| ≥70 years                      | 8,252                     | 0.99 (0.97-1.01)        | 1,801                                              | 0.94 (0.90-0.98)        |
| <b>Oesophageal cancer</b>      | <b>539</b>                | <b>1.10 (1.01-1.19)</b> | <b>134</b>                                         | <b>0.75 (0.63-0.89)</b> |
| <i>Adenocarcinoma</i>          | 319                       | 1.17 (1.04-1.30)        | 75                                                 | 0.81 (0.64-1.01)        |
| <i>Squamous cell carcinoma</i> | 203                       | 1.06 (0.92-1.22)        | 50                                                 | 0.66 (0.49-0.87)        |
| <i>Men</i>                     | 415                       | 1.09 (0.99-1.20)        | 90                                                 | 0.88 (0.63-0.97)        |
| <i>Women</i>                   | 124                       | 1.12 (0.93-1.33)        | 44                                                 | 0.68 (0.49-0.91)        |
| 18-39 years                    | 0                         | -                       | 0                                                  | -                       |
| 40-49 years                    | 1                         | -                       | 5                                                  | 0.87 (0.28-2.03)        |
| 50-59 years                    | 21                        | 0.99 (0.61-1.51)        | 18                                                 | 0.58 (0.34-0.92)        |
| 60-69 years                    | 164                       | 1.35 (1.15-1.57)        | 47                                                 | 0.65 (0.48-0.86)        |
| ≥70 years                      | 353                       | 1.02 (0.92-1.13)        | 64                                                 | 0.92 (0.71-1.18)        |
| <b>Gastric cancer</b>          | <b>1,079</b>              | <b>1.08 (1.01-1.14)</b> | <b>260</b>                                         | <b>0.70 (0.62-0.80)</b> |
| <i>Adenocarcinoma</i>          | 949                       | 1.07 (1.00-1.14)        | 212                                                | 0.66 (0.58-0.76)        |
| <i>Men</i>                     | 714                       | 1.08 (1.00-1.16)        | 128                                                | 0.72 (0.60-0.85)        |
| <i>Women</i>                   | 365                       | 1.08 (0.97-1.19)        | 132                                                | 0.69 (0.58-0.82)        |
| 18-39 years                    | 0                         | -                       | 1                                                  | -                       |
| 40-49 years                    | 3                         | -                       | 13                                                 | 0.71 (0.38-1.22)        |
| 50-59 years                    | 51                        | 1.48 (1.10-1.94)        | 37                                                 | 0.61 (0.43-0.85)        |
| 60-69 years                    | 208                       | 1.20 (1.04-1.37)        | 73                                                 | 0.61 (0.48-0.77)        |
| ≥70 years                      | 817                       | 1.03 (0.96-1.11)        | 136                                                | 0.81 (0.68-0.95)        |
| <b>Small bowel cancer</b>      | <b>253</b>                | <b>1.05 (0.93-1.19)</b> | <b>94</b>                                          | <b>0.84 (0.68-1.02)</b> |
| <i>Carcinoid</i>               | 122                       | 1.11 (0.92-1.32)        | 43                                                 | 0.84 (0.61-1.13)        |
| <i>Men</i>                     | 150                       | 1.05 (0.89-1.23)        | 34                                                 | 0.72 (0.50-1.00)        |
| <i>Women</i>                   | 103                       | 1.06 (0.86-1.28)        | 60                                                 | 0.93 (0.71-1.19)        |
| 18-39 years                    | 0                         | -                       | 1                                                  | -                       |
| 40-49 years                    | 1                         | -                       | 3                                                  | -                       |
| 50-59 years                    | 18                        | 1.53 (0.91-2.41)        | 18                                                 | 0.77 (0.46-1.22)        |

|                                             |                                 |              |                         |              |                         |
|---------------------------------------------|---------------------------------|--------------|-------------------------|--------------|-------------------------|
|                                             | 60-69 years                     | 64           | 1.16 (0.89-1.48)        | 33           | 0.81 (0.56-1.14)        |
|                                             | ≥70 years                       | 170          | 0.99 (0.85-1.15)        | 39           | 0.98 (0.69-1.34)        |
| <b>Colorectal cancer</b>                    |                                 | <b>6,919</b> | <b>1.00 (0.98-1.03)</b> | <b>2,017</b> | <b>0.74 (0.71-0.77)</b> |
|                                             | <i>Adenocarcinoma</i>           | 6,608        | 1.00 (0.80-1.03)        | 1,887        | 0.74 (0.70-0.77)        |
|                                             | <i>Men</i>                      | 4,105        | 1.03 (1.00-1.06)        | 793          | 0.73 (0.68-0.79)        |
|                                             | <i>Women</i>                    | 2,814        | 0.97 (0.93-1.00)        | 1,224        | 0.74 (0.70-0.78)        |
|                                             | 18-39 years                     | 2            | -                       | 10           | 0.61 (0.29-1.13)        |
|                                             | 40-49 years                     | 9            | 0.52 (0.24-0.98)        | 51           | 0.47 (0.35-0.62)        |
|                                             | 50-59 years                     | 241          | 1.16 (1.02-1.31)        | 232          | 0.55 (0.48-0.63)        |
|                                             | 60-69 years                     | 1,268        | 1.05 (0.99-1.11)        | 600          | 0.66 (0.60-0.71)        |
|                                             | ≥70 years                       | 5,399        | 0.99 (0.96-1.02)        | 1,124        | 0.88 (0.83-0.94)        |
| <b>Liver cancer</b>                         |                                 | <b>645</b>   | <b>1.11 (1.03-1.20)</b> | <b>232</b>   | <b>0.96 (0.84-1.09)</b> |
|                                             | <i>Hepatocellular carcinoma</i> | 358          | 1.13 (1.02-1.25)        | 100          | 0.83 (0.77-1.01)        |
|                                             | <i>Men</i>                      | 449          | 1.12 (1.02-1.23)        | 130          | 1.00 (0.84-1.19)        |
|                                             | <i>Women</i>                    | 196          | 1.09 (0.94-1.26)        | 102          | 0.91 (0.74-1.10)        |
|                                             | 18-39 years                     | 0            | -                       | 3            | -                       |
|                                             | 40-49 years                     | 4            | -                       | 10           | 0.95 (0.46-1.75)        |
|                                             | 50-59 years                     | 32           | 1.04 (0.71-1.47)        | 44           | 0.90 (0.65-1.21)        |
|                                             | 60-69 years                     | 182          | 1.36 (1.17-1.57)        | 90           | 0.99 (0.79-1.21)        |
|                                             | ≥70 years                       | 427          | 1.03 (0.94-1.14)        | 85           | 0.95 (0.76-1.17)        |
| <b>Gallbladder and biliary tract cancer</b> |                                 | <b>385</b>   | <b>0.92 (0.83-1.01)</b> | <b>190</b>   | <b>1.03 (0.89-1.19)</b> |
|                                             | <i>Adenocarcinoma</i>           | 288          | 0.93 (0.82-1.04)        | 149          | 1.07 (0.90-1.25)        |
|                                             | <i>Men</i>                      | 181          | 1.00 (0.86-1.15)        | 50           | 0.98 (0.73-1.29)        |
|                                             | <i>Women</i>                    | 204          | 0.85 (0.74-0.80)        | 140          | 1.05 (0.88-1.24)        |
|                                             | 18-39 years                     | 0            | -                       | 1            | -                       |
|                                             | 40-49 years                     | 0            | -                       | 7            | 0.97 (0.39-2.00)        |
|                                             | 50-59 years                     | 6            | 0.52 (.19-1.13)         | 12           | 0.46 (0.24-0.80)        |
|                                             | 60-69 years                     | 91           | 1.31 (1.05-1.60)        | 63           | 1.00 (0.77-1.28)        |
|                                             | ≥70 years                       | 288          | 0.85 (0.76-0.96)        | 107          | 1.23 (1.00-1.48)        |
| <b>Pancreatic cancer</b>                    |                                 | <b>1,114</b> | <b>1.04 (0.98-1.11)</b> | <b>490</b>   | <b>1.00 (0.92-1.10)</b> |
|                                             | <i>Adenocarcinoma</i>           | 835          | 1.00 (0.93-1.07)        | 402          | 1.02 (0.92-1.13)        |
|                                             | <i>Men</i>                      | 629          | 1.07 (0.99-1.16)        | 163          | 0.89 (0.76-1.03)        |
|                                             | <i>Women</i>                    | 485          | 1.01 (0.92-1.11)        | 327          | 1.08 (0.96-1.20)        |
|                                             | 18-39 years                     | 1            | -                       | 1            | -                       |
|                                             | 40-49 years                     | 3            | -                       | 26           | 1.65 (1.08-2.42)        |
|                                             | 50-59 years                     | 37           | 0.91 (0.64-1.25)        | 68           | 0.86 (0.67-1.09)        |
|                                             | 60-69 years                     | 307          | 1.19 (1.06-1.33)        | 174          | 0.85 (0.73-0.99)        |
|                                             | ≥70 years                       | 766          | 1.00 (0.93-1.07)        | 221          | 1.18 (1.03-1.35)        |



**Table 3: The risk of gastrointestinal cancer among aspirin and non-aspirin non-steroidal anti-inflammatory drug (NSAID) users, by estimated duration of use, expressed as standardized incidence ratios (SIRs) and 95% confidence intervals (CIs).**

|                                | Aspirin only (n=783,870) |                 |                  | Non-selective non-aspirin NSAIDs (n=566,209) |                 |                  |
|--------------------------------|--------------------------|-----------------|------------------|----------------------------------------------|-----------------|------------------|
|                                | Categories (quartiles)   | Number of cases | SIRs (95% CI)    | Categories (quartiles)                       | Number of cases | SIRs (95% CI)    |
| <b>Gastrointestinal cancer</b> |                          |                 |                  |                                              |                 |                  |
|                                | 0.5-2.5 years            | 4,158           | 2.77 (2.69-2.85) | 0.5-0.7 years                                | 865             | 1.00 (0.93-1.06) |
|                                | 2.5-5.5 years            | 4,532           | 1.83 (1.77-1.88) | 0.7-1.1 years                                | 832             | 0.92 (0.86-0.98) |
|                                | 5.5-7.7 years            | 1,310           | 0.31 (0.30-0.33) | 1.1-2.1 years                                | 977             | 0.86 (0.80-0.91) |
|                                | >7.7 years               | 969             | 0.37 (0.35-0.40) | >2.1 years                                   | 754             | 0.54 (0.50-0.58) |
| <b>Oesophageal cancer</b>      |                          |                 |                  |                                              |                 |                  |
|                                | 0.5-2.5 years            | 204             | 2.91 (2.52-3.33) | 0.5-0.7 years                                | 35              | 0.93 (0.65-1.29) |
|                                | 2.5-5.5 years            | 216             | 1.83 (1.60-2.09) | 0.7-1.1 years                                | 32              | 0.84 (0.57-1.18) |
|                                | 5.5-7.7 years            | 61              | 0.31 (0.24-0.40) | 1.1-2.1 years                                | 43              | 0.91 (0.66-1.23) |
|                                | >7.7 years               | 58              | 0.56 (0.42-0.72) | >2.1 years                                   | 23              | 0.41 (0.26-0.61) |
| <b>Gastric cancer</b>          |                          |                 |                  |                                              |                 |                  |
|                                | 0.5-2.5 years            | 61              | 2.89 (2.62-3.19) | 0.5-0.7 years                                | 55              | 0.73 (0.55-0.95) |
|                                | 2.5-5.5 years            | 466             | 2.00 (1.82-2.19) | 0.7-1.1 years                                | 61              | 0.78 (0.60-1.01) |
|                                | 5.5-7.7 years            | 99              | 0.26 (0.21-0.31) | 1.1-2.1 years                                | 80              | 0.82 (0.65-1.02) |
|                                | >7.7 years               | 110             | 0.45 (0.37-0.55) | >2.1 years                                   | 64              | 0.54 (0.42-0.69) |
| <b>Small bowel cancer</b>      |                          |                 |                  |                                              |                 |                  |
|                                | 0.5-2.5 years            | 96              | 2.78 (2.25-3.39) | 0.5-0.7 years                                | 22              | 0.94 (0.59-1.43) |
|                                | 2.5-5.5 years            | 109             | 1.94 (1.59-2.33) | 0.7-1.1 years                                | 20              | 0.83 (0.51-1.29) |
|                                | 5.5-7.7 years            | 26              | 0.28 (0.18-0.41) | 1.1-2.1 years                                | 25              | 0.85 (0.55-1.25) |
|                                | >7.7 years               | 22              | 0.39 (0.25-0.60) | >2.1 years                                   | 27              | 0.76 (0.50-1.11) |
| <b>Colorectal cancer</b>       |                          |                 |                  |                                              |                 |                  |
|                                | 0.5-2.5 years            | 2,658           | 2.78 (2.67-2.88) | 0.5-0.7 years                                | 540             | 0.99 (0.91-1.08) |
|                                | 2.5-5.5 years            | 2,844           | 1.79 (1.73-1.86) | 0.7-1.1 years                                | 489             | 0.86 (0.78-0.94) |

|                                             |                      |     |                  |                      |     |                  |
|---------------------------------------------|----------------------|-----|------------------|----------------------|-----|------------------|
|                                             | <i>5.5-7.7 years</i> | 813 | 0.31 (0.29-0.33) | <i>1.1-2.1 years</i> | 565 | 0.78 (0.72-0.85) |
|                                             | <i>&gt;7.7 years</i> | 604 | 0.36 (0.33-0.39) | <i>&gt;2.1 years</i> | 423 | 0.47 (0.43-0.52) |
| <b>Liver cancer</b>                         |                      |     |                  |                      |     |                  |
|                                             | <i>0.5-2.5 years</i> | 222 | 2.63 (2.30-3.00) | <i>0.5-0.7 years</i> | 63  | 1.23 (0.95-1.57) |
|                                             | <i>2.5-5.5 years</i> | 272 | 1.96 (1.74-2.21) | <i>0.7-1.1 years</i> | 53  | 1.02 (0.76-1.33) |
|                                             | <i>5.5-7.7 years</i> | 100 | 0.44 (0.35-0.53) | <i>1.1-2.1 years</i> | 70  | 1.10 (0.86-1.39) |
|                                             | <i>&gt;7.7 years</i> | 51  | 0.40 (0.30-0.53) | <i>&gt;2.1 years</i> | 46  | 0.61 (0.45-0.81) |
| <b>Gallbladder and biliary tract cancer</b> |                      |     |                  |                      |     |                  |
|                                             | <i>0.5-2.5 years</i> | 137 | 2.36 (1.98-2.79) | <i>0.5-0.7 years</i> | 42  | 1.17 (0.85-1.58) |
|                                             | <i>2.5-5.5 years</i> | 143 | 1.52 (1.28-1.79) | <i>0.7-1.1 years</i> | 51  | 1.34 (1.00-1.76) |
|                                             | <i>5.5-7.7 years</i> | 61  | 0.39 (0.30-.50)  | <i>1.1-2.1 years</i> | 52  | 1.06 (0.79-1.39) |
|                                             | <i>&gt;7.7 years</i> | 44  | 0.40 (0.29-0.53) | <i>&gt;2.1 years</i> | 45  | 0.73 (0.53-0.98) |
| <b>Pancreatic cancer</b>                    |                      |     |                  |                      |     |                  |
|                                             | <i>0.5-2.5 years</i> | 424 | 2.79 (2.53-3.06) | <i>0.5-0.7 years</i> | 107 | 1.09 (0.90-1.32) |
|                                             | <i>2.5-5.5 years</i> | 467 | 1.87 (1.71-2.06) | <i>0.7-1.1 years</i> | 123 | 1.20 (1.00-1.43) |
|                                             | <i>5.5-7.7 years</i> | 149 | 0.36 (0.30-0.42) | <i>1.1-2.1 years</i> | 136 | 1.05 (0.88-1.25) |
|                                             | <i>&gt;7.7 years</i> | 74  | 0.28 (0.23-0.37) | <i>&gt;2.1 years</i> | 124 | 0.78 (0.65-0.93) |

**Table 4: The risk of gastrointestinal cancer among maintenance users of cyclo-oxygenase-2 (COX-2) selective and relatively selective non-steroidal anti-inflammatory drugs (NSAIDs), and low-dose aspirin users, presented as standardized incidence ratios (SIRs) and 95% confidence intervals (CIs).**

|                                             | COX-2 selective NSAIDs       |                      | Relatively selective NSAIDs |                      | Low-dose aspirin (n=668,305) |                      |
|---------------------------------------------|------------------------------|----------------------|-----------------------------|----------------------|------------------------------|----------------------|
|                                             | maintenance users (n=17,948) |                      | maintenance users (n=7,609) |                      | Number                       |                      |
|                                             | <i>Number</i>                |                      | <i>Number of</i>            |                      | <i>Number</i>                |                      |
|                                             | <i>of cases</i>              | <i>SIRS (95% CI)</i> | <i>cases</i>                | <i>SIRS (95% CI)</i> | <i>of cases</i>              | <i>SIRS (95% CI)</i> |
| <b>Gastrointestinal cancer</b>              | 100                          | 0.89 (0.73-1.09)     | 74                          | 0.97 (0.76-1.21)     | 9,996                        | 0.86 (0.85-0.88)     |
| <b>Oesophageal cancer</b>                   | 7                            | 1.49 (0.60-3.07)     | 1                           | -                    | 493                          | 0.99 (0.91-1.08)     |
| <b>Gastric cancer</b>                       | 7                            | 0.74 (0.30-1.52)     | 4                           | -                    | 986                          | 0.94 (0.88-1.00)     |
| <b>Small bowel cancer</b>                   | 5                            | 1.72 (0.55-4.00)     | 3                           | -                    | 224                          | 0.84 (0.74-0.96)     |
| <b>Colorectal cancer</b>                    | 60                           | 0.85 (0.65-1.09)     | 50                          | 1.02 (0.76-1.35)     | 6,338                        | 0.85 (0.83-0.88)     |
| <b>Liver cancer</b>                         | 3                            | -                    | 3                           | -                    | 592                          | 0.97 (0.89-1.05)     |
| <b>Gallbladder and biliary tract cancer</b> | 5                            | 1.05 (0.34-2.44)     | 3                           | -                    | 344                          | 0.74 (0.66-0.82)     |
| <b>Pancreatic cancer</b>                    | 13                           | 1.02 (0.54-1.74)     | 10                          | 1.15 (0.55-2.12)     | 990                          | 0.80 (0.75-0.85)     |

**Table 5: The risk of gastrointestinal cancer among aspirin and non-selective non-aspirin non-steroidal anti-inflammatory drug (NSAID) users, stratified by additional use of proton pump inhibitors (PPIs) or statins compared to the total Swedish background population, expressed as standardized incidence ratios (SIRs) and 95% confidence intervals (CIs).**

|                                             | Aspirin users (n=783,870) |                      | Aspirin with PPI (n=200,828) |                      | Aspirin with statins (n=432,996) |                      |
|---------------------------------------------|---------------------------|----------------------|------------------------------|----------------------|----------------------------------|----------------------|
|                                             | <i>Number of cases</i>    | <i>SIRs (95% CI)</i> | <i>Number of cases</i>       | <i>SIRs (95% CI)</i> | <i>Number of cases</i>           | <i>SIRs (95% CI)</i> |
| <b>All gastrointestinal cancer</b>          | 10,969                    | 1.02 (1.00-1.04)     | 3,617                        | 1.25 (1.21-2.29)     | 6,210                            | 0.99 (0.96-1.01)     |
| <b>Oesophageal cancer</b>                   | 539                       | 1.10 (1.01-1.19)     | 247                          | 1.94 (1.71-2.20)     | 299                              | 0.98 (0.87-1.09)     |
| <b>Gastric cancer</b>                       | 1,079                     | 1.08 (1.01-1.14)     | 509                          | 1.89 (1.73-2.06)     | 619                              | 1.05 (0.98-1.13)     |
| <b>Small bowel cancer</b>                   | 253                       | 1.05 (0.93-1.19)     | 107                          | 1.67 (1.37-2.01)     | 139                              | 0.97 (0.81-1.14)     |
| <b>Colorectal cancer</b>                    | 6,919                     | 1.00 (0.98-1.03)     | 2,004                        | 1.07 (1.02-1.12)     | 3,893                            | 0.97 (0.94-1.00)     |
| <b>Liver cancer</b>                         | 645                       | 1.11 (1.03-1.20)     | 231                          | 1.52 (1.33-1.73)     | 351                              | 0.99 (0.89-1.10)     |
| <b>Gallbladder and biliary tract cancer</b> | 385                       | 0.92 (0.83-1.01)     | 117                          | 1.00 (0.82-1.19)     | 212                              | 0.90 (0.78-1.03)     |
| <b>Pancreatic cancer</b>                    | 1,114                     | 1.04 (0.98-1.11)     | 391                          | 1.36 (1.23-1.50)     | 678                              | 1.07 (0.99-2.15)     |

  

|                                             | Non-aspirin NSAIDs users (n=567,569) |                      | Non-selective non-aspirin with PPI (n=148,586) |                      | Non-selective non-aspirin with statins (n=77,514) |                      |
|---------------------------------------------|--------------------------------------|----------------------|------------------------------------------------|----------------------|---------------------------------------------------|----------------------|
|                                             | <i>Number of cases</i>               | <i>SIRs (95% CI)</i> | <i>Number of cases</i>                         | <i>SIRs (95% CI)</i> | <i>Number of cases</i>                            | <i>SIRs (95% CI)</i> |
| <b>All gastrointestinal cancer</b>          | 3,428                                | 0.79 (0.77-0.82)     | 1,360                                          | 1.08 (1.02-1.13)     | 625                                               | 0.71 (0.65-0.76)     |
| <b>Oesophageal cancer</b>                   | 134                                  | 0.75 (0.63-0.89)     | 67                                             | 1.36 (1.05-1.73)     | 24                                                | 0.64 (0.41-0.95)     |
| <b>Gastric cancer</b>                       | 260                                  | 0.70 (0.62-0.80)     | 156                                            | 1.47 (1.25-1.72)     | 44                                                | 0.58 (0.42-0.78)     |
| <b>Small bowel cancer</b>                   | 94                                   | 0.84 (0.68-1.02)     | 45                                             | 1.39 (1.02-1.87)     | 14                                                | 0.64 (0.35-1.07)     |
| <b>Colorectal cancer</b>                    | 2,017                                | 0.74 (0.71-0.77)     | 694                                            | 0.86 (0.80-0.93)     | 380                                               | 0.68 (0.61-0.75)     |
| <b>Liver cancer</b>                         | 232                                  | 0.96 (0.84-1.09)     | 102                                            | 1.51 (1.23-1.83)     | 38                                                | 0.78 (0.55-1.07)     |
| <b>Gallbladder and biliary tract cancer</b> | 190                                  | 1.03 (0.89-1.19)     | 68                                             | 1.21 (0.94-1.53)     | 29                                                | 0.76 (0.51-1.10)     |
| <b>Pancreatic cancer</b>                    | 490                                  | 1.00 (0.92-1.10)     | 222                                            | 1.55 (1.35-1.76)     | 93                                                | 0.92 (0.75-1.13)     |

1  
2  
3  
4  
5  
6  
7  
8  
9  
10  
11  
12  
13  
14  
15  
16  
17  
18  
19  
20  
21  
22  
23  
24  
25  
26  
27  
28  
29  
30  
31  
32  
33  
34  
35  
36  
37  
38  
39  
40  
41  
42  
43  
44  
45  
46  
47  
48  
49  
50  
51  
52  
53  
54  
55  
56  
57  
58  
59  
60

**Online Supplement 1**

Description of original cohort, the “Chemoprevention of Cancer” cohort, and flow-chart describing the selection of the study cohort.

For peer review only

1  
2  
3  
4  
5  
6  
7  
8  
9  
10  
11  
12  
13  
14  
15  
16  
17  
18  
19  
20  
21  
22  
23  
24  
25  
26  
27  
28  
29  
30  
31  
32  
33  
34  
35  
36  
37  
38  
39  
40  
41  
42  
43  
44  
45  
46  
47  
48  
49  
50  
51  
52  
53  
54  
55  
56  
57  
58  
59  
60

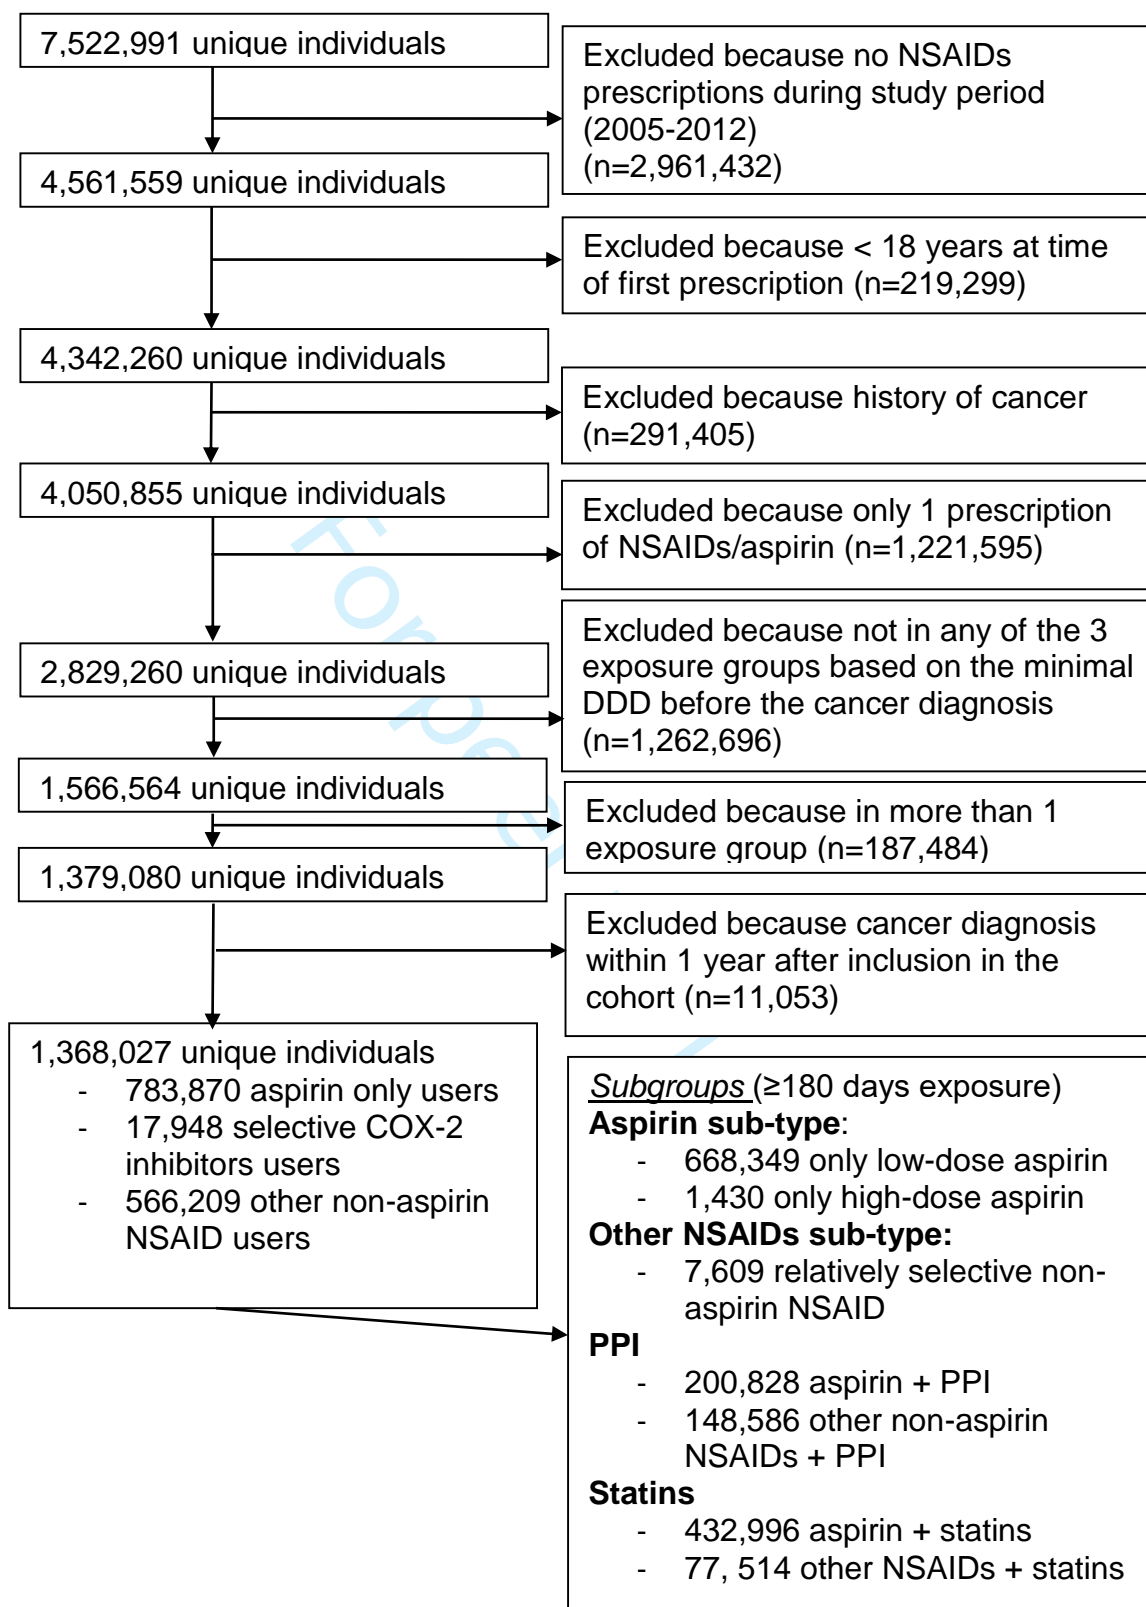

Abbreviations: COX, cyclooxygenase; DDD, defined daily dosage; NSAIDs, non-steroidal anti-inflammatory drugs; PPIs, proton pump inhibitors

1  
2 This cohort included all individuals residing in Sweden who received at least one  
3  
4 dispensed prescription of one of the following commonly prescribed drugs between July 1,  
5  
6 2005 and December 31, 2014 (with corresponding ATC codes) with follow-up for cancer  
7  
8 until December 2012: sex hormones (G03), drugs for peptic ulcers and gastro-esophageal  
9  
10 reflux disease (A02B), acetylsalicylic acid (B01AC06, N02BA), non-steroidal anti-  
11  
12 inflammatory drugs (M01A), HMG CoA reductase inhibitors (C10AA), drugs affecting bone  
13  
14 structure and mineralization, (M05B), and antibiotics (J01AA, J01CA04, J01FA, J01MA,  
15  
16 J01XD, J01XE, J04AB04). This cohort included approximately 85% of all Swedish  
17  
18 residents, with especially high coverage of adults.  
19  
20  
21  
22  
23  
24  
25  
26  
27  
28  
29  
30  
31  
32  
33  
34  
35  
36  
37  
38  
39  
40  
41  
42  
43  
44  
45  
46  
47  
48  
49  
50  
51  
52  
53  
54  
55  
56  
57  
58  
59  
60

**Supplement 2: Year of first prescription among aspirin and non-aspirin non-steroidal anti-inflammatory drugs (NSAIDs) users during the study period.**

|       | <b>Aspirin</b> | <b>Non-aspirin NSAIDs</b> |
|-------|----------------|---------------------------|
|       | <i>N (%)</i>   | <i>N (%)</i>              |
| 2005  | 430,391 (54.9) | 240,848 (42.5)            |
| 2006  | 79,356 (10.1)  | 143,805 (25.4)            |
| 2007  | 60,071 (7.7)   | 71,053 (12.6)             |
| 2008  | 55,527 (7.1)   | 46,013 (8.1)              |
| 2009  | 49,885 (6.4)   | 29,814 (5.3)              |
| 2010  | 43,290 (5.5)   | 18,957 (3.4)              |
| 2011  | 38,415 (4.9)   | 11,736 (2.1)              |
| 2012  | 26,935 (3.4)   | 3,983 (0.7)               |
| Total | 783,87         | 566,209                   |



**Supplement 3: The risk of gastrointestinal cancer among aspirin and non-selective non-aspirin non-steroidal anti-inflammatory drug (NSAID) users comparing users with non-users of additional proton pump inhibitors (PPI) or statins, calculated with Poisson Regression models and expressed as incidence rate ratios (IRR) and 95% confidence intervals (CIs).**

|                                             | <b>Non-selective</b>                |                                        |                                                |                                                                  |
|---------------------------------------------|-------------------------------------|----------------------------------------|------------------------------------------------|------------------------------------------------------------------|
|                                             | <b>Aspirin with PPI vs. without</b> | <b>Aspirin with statin vs. without</b> | <b>non-aspirin NSAIDs with PPI vs. without</b> | <b>Non-selective non-aspirin NSAIDs with statins vs. without</b> |
|                                             | <i>IRR (95% CI)</i>                 | <i>IRR (95% CI)</i>                    | <i>IRR (95% CI)</i>                            | <i>IRR (95% CI)</i>                                              |
| <b>All gastrointestinal cancer</b>          | 1.19 (1.11-1.26)                    | 0.81 (0.77-0.85)                       | 1.61 (1.49-1.74)                               | 0.86 (0.76-0.96)                                                 |
| <b>Oesophageal cancer</b>                   | 2.16 (1.67-2.80)                    | 0.59 (0.47-0.75)                       | 2.58 (1.77-3.75)                               | 0.65 (0.32-1.31)                                                 |
| <b>Gastric cancer</b>                       | 2.26 (1.88-2.71)                    | 0.81 (0.69-0.96)                       | 3.68 (2.80-4.83)                               | 0.62 (0.34-1.11)                                                 |
| <b>Small bowel cancer</b>                   | 1.65 (1.12-2.42)                    | 0.65 (0.47-0.90)                       | 2.20 (1.41-3.42)                               | 0.62 (0.26-1.47)                                                 |
| <b>Colorectal cancer</b>                    | 0.98 (0.90-1.06)                    | 0.85 (0.80-1.90)                       | 1.30 (1.17-1.44)                               | 0.94 (0.81-1.08)                                                 |
| <b>Liver cancer</b>                         | 1.56 (1.23-1.99)                    | 0.64 (0.53-0.78)                       | 2.12 (1.59-2.82)                               | 0.79 (0.49-1.27)                                                 |
| <b>Gallbladder and biliary tract cancer</b> | 0.70 (0.49-1.02)                    | 0.67 (0.52-0.86)                       | 1.28 (0.92-1.77)                               | 0.67 (0.40-1.11)                                                 |
| <b>Pancreatic cancer</b>                    | 1.32 (1.08-1.62)                    | 0.90 (0.77-1.04)                       | 1.88 (1.54-2.30)                               | 0.78 (0.55-1.09)                                                 |

*Adjusted for age at first prescription, sex, and interaction between PPI and statins*

STROBE Statement—Checklist of items that should be included in reports of *cohort studies*

|                              | Item No | Recommendation                                                                                                                                                                                    | Page                          |
|------------------------------|---------|---------------------------------------------------------------------------------------------------------------------------------------------------------------------------------------------------|-------------------------------|
| <b>Title and abstract</b>    | 1       | (a) Indicate the study's design with a commonly used term in the title or the abstract                                                                                                            | p 1 & 3<br>(abstract & title) |
|                              |         | (b) Provide in the abstract an informative and balanced summary of what was done and what was found                                                                                               | p 3                           |
| <b>Introduction</b>          |         |                                                                                                                                                                                                   |                               |
| Background/rationale         | 2       | Explain the scientific background and rationale for the investigation being reported                                                                                                              | p 5-6                         |
| Objectives                   | 3       | State specific objectives, including any prespecified hypotheses                                                                                                                                  | p 6                           |
| <b>Methods</b>               |         |                                                                                                                                                                                                   |                               |
| Study design                 | 4       | Present key elements of study design early in the paper                                                                                                                                           | p 7-10                        |
| Setting                      | 5       | Describe the setting, locations, and relevant dates, including periods of recruitment, exposure, follow-up, and data collection                                                                   | p 7-10                        |
| Participants                 | 6       | (a) Give the eligibility criteria, and the sources and methods of selection of participants. Describe methods of follow-up                                                                        | p 7-10                        |
|                              |         | (b) For matched studies, give matching criteria and number of exposed and unexposed                                                                                                               | n/a                           |
| Variables                    | 7       | Clearly define all outcomes, exposures, predictors, potential confounders, and effect modifiers. Give diagnostic criteria, if applicable                                                          | p 7-10 +<br>appendix          |
| Data sources/<br>measurement | 8*      | For each variable of interest, give sources of data and details of methods of assessment (measurement). Describe comparability of assessment methods if there is more than one group              | p 7-10                        |
| Bias                         | 9       | Describe any efforts to address potential sources of bias                                                                                                                                         | p 7-10                        |
| Study size                   | 10      | Explain how the study size was arrived at                                                                                                                                                         | Fig 1                         |
| Quantitative variables       | 11      | Explain how quantitative variables were handled in the analyses. If applicable, describe which groupings were chosen and why                                                                      | p 7-10                        |
| Statistical methods          | 12      | (a) Describe all statistical methods, including those used to control for confounding                                                                                                             | p 9-10                        |
|                              |         | (b) Describe any methods used to examine subgroups and interactions                                                                                                                               | p 9-10                        |
|                              |         | (c) Explain how missing data were addressed                                                                                                                                                       | p 9-10                        |
|                              |         | (d) If applicable, explain how loss to follow-up was addressed                                                                                                                                    | n/a                           |
|                              |         | (e) Describe any sensitivity analyses                                                                                                                                                             | n/a                           |
| <b>Results</b>               |         |                                                                                                                                                                                                   |                               |
| Participants                 | 13*     | (a) Report numbers of individuals at each stage of study—eg numbers potentially eligible, examined for eligibility, confirmed eligible, included in the study, completing follow-up, and analysed | Fig 1                         |
|                              |         | (b) Give reasons for non-participation at each stage                                                                                                                                              | Fig 1                         |
|                              |         | (c) Consider use of a flow diagram                                                                                                                                                                | Fig 1                         |
| Descriptive data             | 14*     | (a) Give characteristics of study participants (eg demographic, clinical, social) and information on exposures and potential confounders                                                          | p 11, Table 1                 |
|                              |         | (b) Indicate number of participants with missing data for each variable of interest                                                                                                               | n/a                           |
|                              |         | (c) Summarise follow-up time (eg, average and total amount)                                                                                                                                       | Table 1                       |
| Outcome data                 | 15*     | Report numbers of outcome events or summary measures over time                                                                                                                                    | Tables 1-3                    |
| Main results                 | 16      | (a) Give unadjusted estimates and, if applicable, confounder-adjusted                                                                                                                             | Tables 2-4                    |

|                          |    |                                                                                                                                                                            |                   |
|--------------------------|----|----------------------------------------------------------------------------------------------------------------------------------------------------------------------------|-------------------|
|                          |    | estimates and their precision (eg, 95% confidence interval). Make clear which confounders were adjusted for and why they were included                                     |                   |
|                          |    | (b) Report category boundaries when continuous variables were categorized                                                                                                  | Table 1           |
|                          |    | (c) If relevant, consider translating estimates of relative risk into absolute risk for a meaningful time period                                                           |                   |
| Other analyses           | 17 | Report other analyses done—eg analyses of subgroups and interactions, and sensitivity analyses                                                                             | p 11-13, appendix |
| <b>Discussion</b>        |    |                                                                                                                                                                            |                   |
| Key results              | 18 | Summarise key results with reference to study objectives                                                                                                                   | p 14              |
| Limitations              | 19 | Discuss limitations of the study, taking into account sources of potential bias or imprecision. Discuss both direction and magnitude of any potential bias                 | p 14-17           |
| Interpretation           | 20 | Give a cautious overall interpretation of results considering objectives, limitations, multiplicity of analyses, results from similar studies, and other relevant evidence | p 14-17           |
| Generalisability         | 21 | Discuss the generalisability (external validity) of the study results                                                                                                      | p 14-17           |
| <b>Other information</b> |    |                                                                                                                                                                            |                   |
| Funding                  | 22 | Give the source of funding and the role of the funders for the present study and, if applicable, for the original study on which the present article is based              | p 3, p 17         |

\*Give information separately for exposed and unexposed groups.

**Note:** An Explanation and Elaboration article discusses each checklist item and gives methodological background and published examples of transparent reporting. The STROBE checklist is best used in conjunction with this article (freely available on the Web sites of PLoS Medicine at <http://www.plosmedicine.org/>, Annals of Internal Medicine at <http://www.annals.org/>, and Epidemiology at <http://www.epidem.com/>). Information on the STROBE Initiative is available at <http://www.strobe-statement.org>.

# BMJ Open

## Maintenance use of non-steroidal anti-inflammatory drugs and risk of gastrointestinal cancer in a nationwide population-based cohort study in Sweden

|                                 |                                                                                                                                                                                                                    |
|---------------------------------|--------------------------------------------------------------------------------------------------------------------------------------------------------------------------------------------------------------------|
| Journal:                        | <i>BMJ Open</i>                                                                                                                                                                                                    |
| Manuscript ID                   | bmjopen-2018-021869.R1                                                                                                                                                                                             |
| Article Type:                   | Research                                                                                                                                                                                                           |
| Date Submitted by the Author:   | 06-Apr-2018                                                                                                                                                                                                        |
| Complete List of Authors:       | Brusselaers, Nele; Karolinska Institutet, Molecular medicine and Surgery Lagergren, Jesper; Karolinska Institutet, Department of Molecular medicine and Surgery; King's College London, Division of Cancer Studies |
| <b>Primary Subject Heading</b>: | Epidemiology                                                                                                                                                                                                       |
| Secondary Subject Heading:      | Oncology, Pharmacology and therapeutics                                                                                                                                                                            |
| Keywords:                       | Gastrointestinal tumours < GASTROENTEROLOGY, chemoprevention, non-steroidal antiinflammatory drugs, aspirin, coxibs, cancer                                                                                        |
|                                 |                                                                                                                                                                                                                    |

SCHOLARONE™  
Manuscripts

1  
2  
3 **Maintenance use of non-steroidal anti-inflammatory drugs**  
4  
5 **and risk of gastrointestinal cancer in a nationwide population-**  
6 **based cohort study in Sweden.**  
7  
8

9  
10 **Running title: NSAIDs and gastrointestinal cancer prevention**

11 **Authors:** Nele BRUSSELAERS<sup>1,2</sup>, MD MSc PhD, Jesper LAGERGREN<sup>3,4</sup>,  
12  
13 MD PhD.  
14

15 **Affiliations:**

16  
17  
18 <sup>1</sup> Centre for Translational Microbiome Research, Department of Microbiology,  
19 Tumor and Cell Biology, Karolinska Institutet, Karolinska Hospital, Stockholm,  
20  
21 Sweden  
22

23  
24 <sup>2</sup> Science for Life Laboratory (SciLifeLab), Stockholm, Sweden  
25

26  
27 <sup>3</sup> Upper Gastrointestinal Surgery, Department of Molecular medicine and  
28 Surgery, Karolinska Institutet, Karolinska University Hospital, Stockholm,  
29  
30 Sweden.  
31

32  
33 <sup>4</sup> Division of Cancer Studies, King's College London, United Kingdom.  
34

35  
36  
37 **Correspondence and requests for reprints:** Dr. Nele Brusselaers, Centre for  
38 Translational Microbiome Research, Department of Microbiology, Tumor and Cell  
39 biology, Karolinska Institutet, Nobelsvag16, 171 77 Stockholm, Sweden.  
40  
41 E-mail: Nele.Brusselaers@ki.se, Tel: +46 8 524 853 08  
42

43 **Email addresses authors:** [nele.brusselaers@ki.se](mailto:nele.brusselaers@ki.se); [jesper.lagergren@ki.se](mailto:jesper.lagergren@ki.se)  
44

45  
46 **Word count: 3,743 words; Tables: 4, Figures: 0; supplement: 4**  
47  
48  
49  
50  
51  
52  
53  
54  
55  
56  
57  
58  
59  
60

## Structured summary (228 words)

**Objectives:** Aspirin and other non-steroidal anti-inflammatory drugs (NSAIDs) are potential candidates for chemoprevention of gastrointestinal cancer. We aimed to assess the association between contemporary NSAID use ( $\geq 180$  days) and gastrointestinal cancer.

**Design:** Nationwide Swedish population-based cohort study (2005-2012,

**Setting:** Sweden

**Participants:** All adults exposed to maintenance NSAIDs use (aspirin,  $n=783,870$ ; unselective NSAIDs,  $n=566,209$ , selective COX-2 inhibitors,  $n=17,948$ ) compared to the Swedish background population of the same age, sex and calendar period.

**Outcome measures:** the risk of different gastro-intestinal cancer types expressed as standardized incidence ratios (SIR) and 95% confidence intervals (CI), taking into account concurrent proton-pump-inhibitors (PPIs) and statins usage.

**Results:** The SIR for gastro-intestinal cancer for aspirin-use was 1.02 (95%CI 1.00-1.04), with clearly reduced risk for long-term users (SIR=0.31, 95%CI 0.30-0.33 for 5.5-7.7 years), and stronger protective effect for low-dose aspirin (SIR=0.86, 95% CI 0.85-0.88). Users of non-selective NSAIDs showed an overall decreased risk of gastrointestinal cancer (SIR=0.79, 95%CI 0.77-0.82), in particular for cancer of the stomach, colorectum and oesophagus, and the SIRs were further decreased among long-term users. Users of selective COX-2 inhibitors showed a SIR=0.89 (95%CI 0.73-1.09) for gastrointestinal cancers. Both aspirin and unselective NSAIDs users who also

1  
2  
3 were using PPIs, had higher risks for all gastrointestinal cancer types; and  
4  
5 lower risk if using statins.  
6

7 **Conclusion:** Long-term use of (low-dose) aspirin and non-selective NSAIDs  
8  
9 was associated with a decreased risk of all gastrointestinal cancer types.  
10

11  
12  
13 **Key words:** gastro-intestinal cancer, chemoprevention, non-steroidal anti-  
14  
15 inflammatory drugs, aspirin, coxibs, cancer, pharmaco-epidemiology.  
16  
17  
18  
19  
20  
21  
22  
23  
24  
25  
26  
27  
28  
29  
30  
31  
32  
33  
34  
35  
36  
37  
38  
39  
40  
41  
42  
43  
44  
45  
46  
47  
48  
49  
50  
51  
52  
53  
54  
55  
56  
57  
58  
59  
60

### Article summary: Strengths and limitations of this study

- Population-based and nationwide design based on contemporary use of aspirin and other non-steroidal anti-inflammatory drugs (NSAIDs) – resulting in sufficient power to assess less common types of gastrointestinal cancer, and different formulations of NSAIDs.
- Concurrent maintenance use of statins and proton pump inhibitors is assessed.
- This study is based on real-life user information because of the population-based design, which leads to inherent problems of confounding by indication and reverse causality which were taken into account in the design and analyses.
- The findings are standardized for age, sex – which are often described as the major confounding factors in epidemiologic studies - and calendar time. Yet, other confounders could not be taken into account because the information was not available for the total background population.
- Exposure information is based on the Swedish Prescribed Drug Registry, which is initiated in July 2005 and has a complete nationwide coverage.



## Introduction

Inflammatory processes in tumour tissue are likely to contribute to tumour progression, immunosuppression and facilitate tumour growth, and cancer susceptibility and severity may also depend on different inflammatory responses.[1] Therefore, aspirin and other non-steroidal anti-inflammatory drugs (NSAIDs) are among the most promising candidates for chemoprevention of cancer, in particular tumours of the gastrointestinal tract. Despite the different indications for maintenance use of aspirin and non-aspirin NSAIDs, the underlying mechanisms are similar.[2 3] NSAIDs inhibit cyclo-oxygenase (COX), an enzyme responsible for the formation of thromboxane (a lipid acting as a vasoconstrictor, which also facilitates platelet aggregation) and prostaglandins (a messenger molecule in the inflammatory pathway); yet only aspirin permanently inhibits platelet formation.[4 5] There are 2 types of NSAIDs, inhibiting both COX-1 and COX-2, or only COX-2. COX-1 is expressed in most tissues regulating many physiological processes.[6] By inhibiting prostaglandin synthesis, NSAIDs compromise gastroduodenal defence mechanisms, including reducing blood flow and mucus and bicarbonate secretion, which may lead to dyspepsia and peptic ulcers, for which proton pump inhibitors (PPIs) are often prescribed as prevention or treatment.[5 6] COX-2 is expressed at sites of inflammation, and is the actual target of NSAIDs.[6] In contrast to non-selective COX-inhibitors (i.e. aspirin and most other NSAIDs), COX-2 selective inhibitors or coxibs are also weakly acidic, and therefore avoid substantial accumulation in (and damage of) the gastric mucosa.[6] Clinical studies have shown similar anti-inflammatory effects, a lower risk of gastrointestinal toxicity, yet a higher risk

1  
2  
3 of cardiovascular morbidity for COX-2 selective inhibitors compared to  
4 nonselective COX-inhibitors.[3 7 8] Some of the older NSAIDs are “relatively  
5 selective COX-2 inhibitors”, i.e. nabumetone, meloxicam, etodolac and  
6  
7 nimesulide.[3]  
8  
9

10  
11 However, epidemiological evidence to support a chemopreventive effect is still  
12 limited, mainly because large numbers are needed with a long follow-up, in  
13 particular for relatively rare cancer types. Meta-analyses have pooled the  
14 evidence of the gastrointestinal cancer preventive potential of aspirin and  
15 other NSAIDs.[9-14] A large meta-analysis[15] and another detailed scientific  
16 assessment[16] concluded that a preventive effect on colorectal cancer was  
17 especially pronounced in daily and long-term users (>5 years) in both  
18 interventional and observational studies,[15 16] with similar findings in recent  
19 studies on gastric cancer.[17 18] Yet, these studies used several different  
20 definitions of exposure, ranging from a single prescription of aspirin to daily  
21 use for >5 years, with too few studies reporting stratified analyses per dosage  
22 (or indication e.g. low dose anti-coagulants versus high dose analgesics) to  
23 draw reliable conclusions (although low dose has been recommended by  
24 individual studies).[15] The statistical power was too low to identify  
25 associations with many other types of (gastro-intestinal) cancer, and more,  
26 large original studies are needed to assess the potential preventive effect of  
27 other NSAIDs.[15]  
28  
29

30  
31 The role of PPI use on the association between NSAIDs with gastrointestinal  
32 cancer is insufficiently understood yet increasingly investigated, with growing  
33 evidence of carcinogenic and other long-term side-effects of PPIs.[19-22]  
34  
35  
36  
37  
38  
39  
40  
41  
42  
43  
44  
45  
46  
47  
48  
49  
50  
51  
52  
53  
54  
55  
56  
57  
58  
59  
60

1  
2  
3 The objective of this study was to assess the association of aspirin and other  
4 NSAIDs on the risk of different gastrointestinal cancer types, while also  
5 assessing the potential influence of concomitant PPI use.  
6  
7  
8  
9

## 10 11 **Material and Methods**

12  
13  
14 This nationwide Swedish population-based cohort study assessed the risk of  
15 gastrointestinal cancer in adult NSAIDs users compared to the risk in the  
16 entire Swedish background population of the corresponding sex, age and  
17 calendar year (7.1-7.6 million adults). [23] [23] [21][21] Participants were  
18 enrolled during the study period from July 1, 2005 (the start of the Swedish  
19 Prescribed Drug Registry) to December 31, 2012. The cohort members were  
20 followed up until the occurrence of any cancer (excluding non-melanoma skin  
21 cancer), death or December 31, 2012 (i.e. the end of data collection for the  
22 Swedish Cancer Registry), whichever occurred first. Individuals with a history  
23 of any cancer were excluded, as well as individuals with a cancer diagnosis  
24 within 12 months after inclusion (to avoid reverse causation). The unique 10-  
25 digit personal identity number, assigned to each Swedish resident, was used  
26 for identification of all participants and for linkages of their individual data  
27 between registries. This study was conducted according to a detailed and a-  
28 priori established study protocol.  
29  
30  
31  
32  
33  
34  
35  
36  
37  
38  
39  
40  
41  
42  
43  
44  
45  
46  
47  
48

### 49 ***Data collection***

50  
51 The data for the present study were derived from our Chemoprevention of  
52 cancer cohort. The study protocol conforms to the ethical guidelines of the  
53 1975 Declaration of Helsinki as reflected in a prior approval by the institution's  
54  
55  
56  
57  
58  
59  
60

1  
2  
3 human research committee, the Regional Ethical Review Board in Stockholm,  
4 without need for informed consent (2014/1291-31/4, approved 27 AUG  
5 2014)(see Supplement 1 and [24-26]). This data collection originates from the  
6 nationwide complete Swedish Prescribed Drug Registry, and includes all  
7 individuals residing in Sweden who have collected at least one dispensed  
8 prescription of any commonly prescribed drug between July 1, 2005 and  
9 December 31, 2014 (approximately 85% of all Swedish residents); with follow-  
10 up for cancer until December 31, 2012. This cohort has been linked to two  
11 other high-quality and complete nationwide Swedish registries, i.e. the  
12 Swedish Cancer Registry (>96% completeness of all cancers, originated in  
13 1961),[27] and the Swedish Causes of Death Registry (>99% completeness,  
14 originated in 1952), by means of the personal identity number.  
15  
16  
17  
18  
19  
20  
21  
22  
23  
24  
25  
26  
27  
28  
29  
30

### 31 **Exposures**

32  
33 Therapy with systemic NSAIDs was defined as at least 6 months ( $\geq 180$  days)  
34 cumulative exposure during the study period. This was a cumulative exposure  
35 based on the defined daily dosage (DDD) per prescribed package, which  
36 takes into account the potency of the drug as well as the prescribed quantity.  
37  
38 Three main types of NSAIDs were categorized based on their mechanisms of  
39 action (selective or non-selective COX inhibition) and drug class (aspirin or  
40 non-aspirin NSAIDs) with corresponding Anatomical Therapeutic Chemical  
41 classification codes (ATC): 1) aspirin (B01AC06, N02BA), 2) selective COX-2  
42 inhibitors (coxibs, M01AH), and 3) non-selective non-aspirin NSAIDs  
43 (remaining M01A codes). Individuals with  $\geq 180$  days of exposure to 2 or 3 of  
44 these groups were excluded, so the 3 groups are mutually exclusive. Users of  
45  
46  
47  
48  
49  
50  
51  
52  
53  
54  
55  
56  
57  
58  
59  
60

1  
2  
3 combination preparations including aspirin, i.e. with corticosteroid (M01BA03),  
4 PPIs (B01AC56), statins (C10BX), as well as preparations for local (oral) use  
5 (A01AD05) were also excluded.  
6  
7

8  
9 Additionally, the relatively selective COX-2 inhibitors, a subgroup of the non-  
10 selective NSAID users, containing meloxicam (M01AC06) and nabumetone  
11 (M01AX01), were also analysed separately. Aspirin users were also divided in  
12 2 groups according to their ATC code ( $\geq 180$  days): low dose (B01AC06), and  
13 high dose aspirin (N02BA) (those using both for  $\geq 180$  days were  
14 excluded).[28] High-dose aspirin (N02BA) and some other NSAIDs  
15 (Diclofenac, M01AB05 and Ibuprofen, M01AE01) are also available over the  
16 counter in Sweden, but they are sold in only small packages and at higher  
17 prices per dose.[28 29] Thus, we can assume that maintenance users had  
18 their doses prescribed, and were thus recorded in the present study.  
19  
20  
21  
22  
23  
24  
25  
26  
27  
28  
29  
30  
31  
32

### 33 **Outcomes**

34  
35 The outcome was a first gastrointestinal cancer diagnosis recorded in the  
36 Swedish Cancer Registry according to the International Classification of  
37 Diseases (ICD) 10<sup>th</sup> edition, including all cancers of the alimentary and  
38 hepatobiliary tract. Gastrointestinal cancers were categorized as follows: any  
39 gastrointestinal cancer (C15-C26) or cancer of the oesophagus (C15),  
40 stomach (C16), small bowel (C17), colorectum (C18-C21), liver, including  
41 intrahepatic bile ducts (C22), gallbladder or extrahepatic bile ducts (C23-24),  
42 or pancreas (C25). The category "other gastrointestinal cancer" (C26) was not  
43 analysed separately. Additionally, the most common histological tumour types  
44 were analysed separately: adenocarcinoma (code 096) for oesophageal,  
45  
46  
47  
48  
49  
50  
51  
52  
53  
54  
55  
56  
57  
58  
59  
60

1  
2  
3 gastric, gallbladder/biliary tract, pancreas and colorectal cancer; squamous  
4  
5 cell carcinoma (code 146) for oesophageal cancer; hepatocellular carcinoma  
6  
7 (code 066) and cholangiocarcinoma (code 076) for liver cancer; and carcinoid  
8  
9 (code 086) for small bowel cancer.  
10

### 11 12 13 14 **Statistical analyses**

15  
16  
17 The relative risks of developing gastrointestinal cancer in individuals exposed  
18  
19 to the drugs under study were standardized using the Swedish background  
20  
21 population of the corresponding age, sex, and calendar period. Standardized  
22  
23 incidence ratios (SIRs) and 95% confidence intervals (CIs) were calculated,  
24  
25 while accounting for changes in age and calendar categories when calculating  
26  
27 years of follow-up.[30] Follow-up time was counted from the dispense date of  
28  
29 the first NSAID prescription to the date of a first cancer diagnosis, death, or  
30  
31 the end of the study (31<sup>st</sup> December 2012), whichever occurred first. The  
32  
33 expected incidence rates were calculated from cancer data recorded in the  
34  
35 Swedish Cancer Registry and the age-stratified number of individuals per  
36  
37 calendar year according to Statistics Sweden (Population Statistics). The  
38  
39 overall SIR for gastrointestinal cancer was calculated, as well as SIRs for  
40  
41 each anatomical location separately, including sub-analyses for the most  
42  
43 common histological types. The analyses were also stratified for sex and age  
44  
45 for each cancer type. Subgroup analyses were performed for high-dose and  
46  
47 low-dose aspirin, users of relatively selective COX-2 inhibitors, NSAID use  
48  
49 with concurrent PPI (A02BC) or statin (C10AA) use ( $\geq 180$  days) if the groups  
50  
51 were sufficiently large. To assess the effect of PPI and statins, a multivariable  
52  
53 Poisson regression model was fitted, adjusting for age at first prescription, sex  
54  
55  
56  
57  
58  
59  
60

1  
2  
3 and interaction between PPI and statins, and presented as incidence rate  
4 ratios (IRR) and 95%CI. The duration of the exposures was assessed by  
5 dividing the total cumulative dosage (sum of DDDs per package) received  
6 before the cancer diagnosis into four equally sized groups (quartiles), yet their  
7 total follow-up time was taken into account for the analyses. There were no  
8 missing data on exposures, outcomes or confounding variables. Effect  
9 estimates were only reported when at least 5 individuals developed the  
10 outcome.  
11  
12  
13  
14  
15  
16  
17  
18  
19  
20  
21

### 22 ***Patient involvement***

23  
24 The Swedish patient organization for cancer of the esophagus, stomach, liver,  
25 and pancreas was involved in supporting the present study  
26 ([www.palema.org](http://www.palema.org)). The development of the research question and outcome  
27 measures were informed by patients' priorities, experience, and preferences.  
28  
29 The results will be disseminated to study participants by means of patient  
30 organizations. Patients are thanked in the acknowledgements.  
31  
32  
33  
34  
35  
36  
37  
38  
39

### 40 **Results**

41  
42 Among all 1,368,027 users of NSAIDs, there were 783,870 (57.3%) aspirin  
43 users, 566,209 (41.4%) non-selective NSAIDs users, and 17,948 (1.3%)  
44 COX-2 users (Table 1, Supplement 1). Aspirin users were more likely to be  
45 male (53.8%) and older than 70 years (54.9.2%), while non-selective NSAID  
46 users and COX-2 users were predominantly female (62.8% and 59.9%,  
47 respectively) and between 40 and 70 years of age (68.2% and 70.8%,  
48 respectively). Use of PPIs was found in 25.6%, 26.2%, and 31.2% of the  
49  
50  
51  
52  
53  
54  
55  
56  
57  
58  
59  
60

1  
2  
3 aspirin users, non-selective NSAIDs users, and COX-2 users, respectively;  
4  
5 and use of statins in 55.2%, 13.7% and 14.4%, respectively. The majority of  
6  
7 the population received their first prescription during the first half year of the  
8  
9 study period (2005), 54.9% of aspirin users, and 42.5% of non-selective  
10  
11 NSAIDs users (Supplement 2).  
12  
13

### 14 15 **Aspirin**

16  
17 As presented in Table 1, 10.969 (1.40%) aspirin users developed some type  
18  
19 of gastrointestinal cancer during the follow-up. The most common cancer sites  
20  
21 were colorectal (n=6,919; 0.88%), gastric (n=1,079; 0.14%), and pancreatic  
22  
23 (n=1,114; 0.14%). There was no association with gastrointestinal cancer  
24  
25 based on the overall SIRs for aspirin users (SIR=1.02, 95% CI 1.00-1.04)  
26  
27 (Table 2). Shorter duration of use (<5.5 years) seemed to be associated with  
28  
29 an increased risk for all gastro-intestinal cancers. Yet, longer duration of  
30  
31 aspirin use was followed by a decreased SIR for gastrointestinal cancer  
32  
33 (SIR=0.31, 95% CI 0.30-0.33 for those with an estimated use between 5.5-7.7  
34  
35 years, and SIR=0.37, 95%CI 0.35-0.40 for >7.7 years) (Table 3) and long-  
36  
37 term aspirin users had clearly decreased SIRs for each gastrointestinal  
38  
39 cancer type (Table 3). The subgroup analyses including only the low-dosage  
40  
41 aspirin users (N=668,305, 85.3% of the aspirin cohort) showed lower SIRs for  
42  
43 all cancer locations, with significantly reduced risks for all locations except for  
44  
45 oesophageal, gastric and liver cancer (Supplement 3).  
46  
47  
48  
49  
50  
51

### 52 **Non-selective NSAIDs**

53  
54  
55  
56  
57  
58  
59  
60



1  
2  
3 Table 1 shows that 3,428 (0.61%) of the non-selective NSAID users  
4 developed cancer, mainly colorectal (n=2,017; 0.36%), pancreatic (n=490;  
5 0.09%), and gastric cancers (n=260; 0.05%). Overall, there was a decreased  
6 risk of gastrointestinal cancer (SIR=0.79, 95%CI 0.77-0.82), and also for  
7 gastric (SIR=0.70, 95% CI 0.62-0.80), colorectal (SIR=0.74, 95% CI 0.71-  
8 0.77) and oesophageal (SIR=0.75, 95% CI 0.63-0.89) cancers analysed  
9 separately (and their main histological subtypes) (Table 2). There was no  
10 evidence of decreased SIRs for the other types of gastrointestinal cancer  
11 types, although the effect sizes indicated a decreased SIR of small bowel and  
12 liver cancer. Longer duration of use of non-selective NSAIDs was associated  
13 with a decreased gastrointestinal cancer risk for all anatomical locations  
14 (Table 3).  
15  
16  
17  
18  
19  
20  
21  
22  
23  
24  
25  
26  
27  
28  
29  
30

### 31 ***Selective COX-2 inhibitors***

32  
33 Overall, 100 (0.56%) COX-2 users developed some type of gastrointestinal  
34 cancer, predominantly colorectal (n=60; 0.33%), pancreatic (n=13; 0.07%),  
35 gastric (n=7; 0.04%), and oesophageal cancers (n=7; 0.04%). There was  
36 some evidence for a decreased risk of gastrointestinal cancer overall  
37 (SIR=0.89, 95% CI 0.73-1.09), although not statistically significant. None of  
38 the sub-analyses showed strong evidence for an association (Supplement 3).  
39  
40  
41  
42  
43  
44  
45  
46  
47

### 48 ***Relatively selective COX-2 inhibitors***

49  
50 Among the non-selective NSAIDs users, 7,609 individuals used relatively  
51 selective COX-2 inhibitors, of whom 74 (0.01%) developed cancer. There was  
52  
53  
54  
55  
56  
57  
58  
59  
60

1  
2  
3 no evidence for an association with any of the gastrointestinal cancer  
4 locations (Supplement 3).  
5  
6  
7

### 8 9 ***Aspirin with PPIs or statins***

10  
11 Users of aspirin with concomitant use of PPIs had higher SIRs for all  
12 gastrointestinal cancers compared to those not using PPIs, with all SIRs  
13 indicating an increased risk except for gallbladder cancer (Table 4). The SIRs  
14 were especially increased for gastric cancer (SIR=1.89; 95% CI 1.73-2.06)  
15 and oesophageal cancer (SIR=1.94; 95% CI 1.71-2.20). When using Poisson  
16 regression to compare aspirin users using PPIs directly with aspirin users not  
17 using PPIs (instead of using the background population as reference), the risk  
18 was increased for all gastrointestinal cancers (IRR=1.19, 95% CI 1.11-1.26),  
19 with significantly increased risks for oesophageal, gastric, small bowel, liver  
20 and pancreatic cancer (Supplement 4).  
21  
22  
23  
24  
25  
26  
27  
28  
29  
30  
31  
32

33 Among aspirin users exposed to statins, the SIRs were close to unity for each  
34 anatomical location (Table 4). When aspirin users using statins were directly  
35 compared with aspirin users not using statins, risks were decreased for all  
36 gastrointestinal cancers (IRR=0.81, 95% CI 0.77-0.85), with significant  
37 decreases for all cancer locations except for colorectal and pancreatic cancer  
38 (Supplement 4).  
39  
40  
41  
42  
43  
44  
45  
46  
47  
48  
49

### 50 51 ***Non-selective NSAIDs with PPIs or statins***

52  
53 In users of non-selective NSAIDs on therapy with PPIs, the SIRs were  
54 increased for all gastrointestinal cancer types (and again higher than among  
55  
56  
57  
58  
59  
60

1  
2  
3 those not using PPIs), except for colorectal cancer (Table 4). When users of  
4  
5 non-selective NSAIDs using PPIs were directly compared with those not using  
6  
7 PPIs, risks were increased for all gastrointestinal cancers (IRR=1.61, 95% CI  
8  
9 1.49-1.74), and each individual cancer location except for gallbladder cancer  
10  
11 (Supplement 4). Among non-selective NSAIDs users using statins, the SIRs  
12  
13 were lower than among all users of non-selective NSAIDs, and significantly  
14  
15 reduced for oesophageal, gastric and colorectal cancer. When users of non-  
16  
17 selective NSAIDs using statins were directly compared with those not using  
18  
19 statins, risks were decreased for all gastrointestinal cancers (IRR=0.86, 95%  
20  
21 CI 0.76-0.96), yet not significant for the individual cancer locations  
22  
23 (Supplement 4).  
24  
25  
26  
27  
28

## 29 Discussion

30  
31 This study on contemporary use of NSAIDs showed a decreased risk of all  
32  
33 types of gastrointestinal cancer among long-term users of aspirin (>5.5 years)  
34  
35 and non-selective NSAIDs users even for shorter duration of use (>0.7 years).  
36  
37 Long-term users of non-selective NSAIDs were at a particularly decreased  
38  
39 risk for gastric, oesophageal, and colorectal cancers. These seemingly  
40  
41 protective associations might be counteracted by concomitant PPI therapy,  
42  
43 and enhanced by concomitant statin use.  
44  
45  
46  
47  
48

49 The main strengths of this study are the population-based design and large  
50  
51 sample size, including all adults residing in Sweden during the study period,  
52  
53 which enabled separate analyses for contemporary use of different types of  
54  
55 NSAIDs, and evaluation of less common types of gastrointestinal cancer  
56  
57  
58  
59  
60

1  
2  
3 which could not be assessed previously because of insufficient power, in  
4 particular for non-aspirin NSAIDs. Other advantages include the complete  
5 follow-up and accurate censoring for mortality. The data on the exposures  
6 (medications) and outcomes (gastrointestinal cancers) were highly accurate  
7 due to the validity and completeness of the Swedish registries, eliminating  
8 recall bias.  
9  
10  
11  
12  
13  
14  
15  
16  
17

18 Although our findings for aspirin are largely consistent with the literature, that  
19 the protective effect is only seen after 5 years, reverse causation, confounding  
20 and/or bias appear to influence the aspirin analyses because of the apparent  
21 initial increased risk of cancer among short-term users. By excluding all  
22 individuals diagnosed with cancer within a year after enrolment, and only  
23 including those with a minimal accumulated duration of use of 6 months, the  
24 risk of reverse causation should be reduced. Yet, our results indicate that  
25 those with an estimated duration shorter than 5 years have an apparent  
26 increased risk, which might be because they take aspirin because of yet  
27 undiagnosed cancer-related pain or thrombotic events – indicating  
28 confounding by indication and reverse causation among the group with the  
29 shortest exposure time, an effect which could not have been detected in  
30 intervention trials or in case-control studies with a study-design-inherent more  
31 restrictive selection of study participants.[15 31] As previous studies reported,  
32 15-20% of cancer patients have thrombotic complications during the course of  
33 the disease (often as early manifestation of an occult malignancy),[32] yet  
34 these complications (e.g. deep venous thrombosis) are more likely to be  
35 treated with anti-coagulants than aspirin. However, when only looking at those  
36  
37  
38  
39  
40  
41  
42  
43  
44  
45  
46  
47  
48  
49  
50  
51  
52  
53  
54  
55  
56  
57  
58  
59  
60

1  
2  
3 exclusively using low-dose aspirin for  $\geq 180$  days, i.e. the platelet aggregation  
4 inhibitors, the protective effects were also visible in the overall analyses non  
5 taking into account duration, with SIR=0.86 (95%CI 0.85-0.88). This indicates  
6 that the apparent increased risks are mainly because of the small group using  
7 aspirin as analgesic (high dose), which shows it is important to distinguish  
8 between both groups of aspirin-use. Reverse causality seems to be less of a  
9 problem for other NSAIDs users, although these may be used as  
10 analgesics.[33] Yet, individuals using NSAIDs may be at a lower a-priori risk  
11 of developing gastro-intestinal cancer, because individuals with upper gastro-  
12 intestinal symptoms are less likely to be chronic NSAIDs users due to the risk  
13 of gastro-intestinal side-effects.

14  
15 Especially for aspirin users (with a high cardiovascular mortality, higher  
16 average age than NSAIDs users and more chronic comorbidities), death is a  
17 competing risk for the development of cancer, reducing the number at risk to  
18 develop cancer. Therefore, we censored follow-up time at time of death. In  
19 this cohort the standardised mortality risks were 9.64 (95%CI 9.60-9.69) for  
20 aspirin users and 2.08 (95% CI 2.05-2.11) for non-selective non-aspirin  
21 NSAIDs users indeed showing a higher risk of death competing with the risk  
22 of cancer, leading to an overestimation of the protective effect in particular  
23 among aspirin users

24  
25  
26  
27  
28  
29  
30  
31  
32  
33  
34  
35  
36  
37  
38  
39  
40  
41  
42  
43  
44  
45  
46  
47  
48 Another limitation is potential confounding, e.g. by socio-economic status,  
49 dietary factors, obesity, tobacco smoking, and alcohol consumption, which  
50 could not be taken into account since such information was not available for  
51 the total background population. However, we adjusted for age, sex and  
52  
53  
54  
55  
56  
57  
58  
59  
60

1  
2  
3 calendar period. Cancer-type specific confounders and their treatment such  
4 as *Helicobacter pylori* for gastric cancer, hepatitis B/C infection for liver cancer  
5 and chronic inflammatory diseases such as inflammatory bowel disease for  
6 bowel cancer and pancreatitis for pancreatic cancer, may also have  
7 contributed to the risk of cancer and timing of diagnosis. We may have  
8 incomplete exposure ascertainment (and underestimation of duration of use)  
9 for part of our cohort since no information was available on prescriptions  
10 before July 2005 or over-the-counter use. Yet, potential long-term (protective)  
11 effects may be expected to decrease gradually yet significantly after treatment  
12 cessation, reducing the potential effect of misclassification on our results due  
13 to exposure before 2005. We used the minimal exposure criterion of 180 days  
14 to exclude occasional users who are more likely to obtain their NSAIDs over-  
15 the-counter, so at a higher price. We did not have data on used daily dosage  
16 or duration of use, and used a proxy variable for duration based on  
17 accumulation of the average DDDs per package. This explains why some  
18 aspirin users had an estimated exposure time longer than the duration of  
19 follow-up, indicating a high daily dose. The high variability in actual and  
20 estimated administered dosage also hindered assessment of recency of use.  
21 Some previous studies subdivided aspirin use into “low dose” and “high dose”  
22 based on prescribed dosages (e.g. <75 mg/day[34] or <100 mg/day[14]), but  
23 since we did not have information on the number of prescribed pills per day,  
24 and different dosages could have been prescribed during the study period, we  
25 used the definition based on ATC coding and assessed the estimated  
26 duration of use, with the additional advantage that the low-dose aspirin was  
27 only available on prescription. This should also be a more accurate reflection  
28  
29  
30  
31  
32  
33  
34  
35  
36  
37  
38  
39  
40  
41  
42  
43  
44  
45  
46  
47  
48  
49  
50  
51  
52  
53  
54  
55  
56  
57  
58  
59  
60

1  
2  
3 of duration of use than the number of prescriptions.[9] In our study, the DDD  
4 per package could range from <5 to 500 (for other NSAIDs) or 1000 (for  
5 aspirin), which illustrates the variation between prescriptions. Since 1.4 million  
6 individuals were exposed to NSAIDs ( $\geq 180$  days), i.e. one fifth of the adult  
7 population in Sweden, our results are likely to be diluted since we compared  
8 them with the total background population. Yet, despite this dilution the  
9 associations among long-term users were strongly decreased.  
10  
11  
12  
13  
14  
15  
16  
17  
18  
19

20 Compared to previous studies, this study was better powered to separately  
21 analyses different gastrointestinal cancers and types of NSAIDs.[35] The  
22 above mentioned meta-analysis[15] identified only 2 cohort studies including  
23 over 100,000 individuals assessing colorectal cancer risk among aspirin-  
24 users.[36 37] Even our exposed groups for aspirin and non-selective NSAIDs  
25 alone were 5-7 times larger than earlier large studies. The decrease in  
26 gastrointestinal cancer risk became evident only after longer exposure, which  
27 has also been shown in previous research,[15 38] and is biologically plausible  
28 given the expected time latency for (hindering) cancer progression.  
29  
30  
31  
32  
33  
34  
35  
36  
37  
38  
39  
40  
41

42 The higher risk among aspirin and other NSAID users also using PPIs should  
43 be interpreted with some caution. PPIs are often prescribed for  
44 gastroesophageal reflux and peptic ulcers, which are risk factors for  
45 oesophageal and gastric cancer, respectively. Therefore, a higher cancer risk  
46 was expected for those locations, yet not for the other gastrointestinal cancer  
47 types. PPIs can also be used to prevent peptic ulcers in users of aspirin and  
48 other NSAIDs, usually in individuals without any gastro-intestinal morbidity.  
49  
50  
51  
52  
53  
54  
55  
56  
57  
58  
59  
60

1  
2  
3 Another study of our group based on the same source cohort,[26] investigated  
4 the risk of gastric cancer among PPI maintenance users, which suggested an  
5 increased risk in all indication groups for PPI (including those without  
6 gastrointestinal symptoms); which also supports a potential independent role  
7 for PPI in carcinogenesis as also suggested recently by other groups.[39 40]  
8  
9 Together with a potential increased risk of mortality related to long-term PPI  
10 use,[41] we believe a more careful approach should be considered when  
11 prescribing PPIs to prevent gastrointestinal complications in long-term  
12 NSAIDs users. Yet, the risk for gastrointestinal complications such as  
13 bleeding should be assessed on an individual bases based on other research  
14 investigating shorter-term effects.[42] Before considering implementing aspirin  
15 or other NSAIDs as wide-spread intervention, safety, in particular considering  
16 long-term use, needs to be considered, with previous research tending  
17 towards a “favourable benefit harm-profile” despite an excess risk of  
18 bleeding.[43]  
19  
20  
21  
22  
23  
24  
25  
26  
27  
28  
29  
30  
31  
32  
33  
34  
35  
36  
37  
38  
39  
40  
41  
42  
43  
44  
45  
46  
47

To conclude, this large Swedish nationwide and population-based cohort study on contemporary and long-term use of NSAIDs indicates a strongly protective effect of long-term use of both (low-dose) aspirin and other non-selective NSAIDs on gastrointestinal cancer development.

**Acknowledgements:** We are grateful to all thousands of patients, physicians and healthcare staff members who contributed to the data collection, and to the Swedish National Board of Health and Welfare that collected the data.



1  
2  
3 **Authors' contributions:** NB is the submission guarantor. NB and JL had full  
4 access to all the data in the study and take responsibility for the integrity of  
5 the data and the accuracy of the data analysis. NB conducted and is  
6 responsible for the data-analysis. Literature search: NB; Design of the study:  
7 both authors; Data collection and preparation for analyses: NB; Data analysis:  
8 NB; Data interpretation: both authors; Writing of first draft: NB, revised and  
9 approved by both authors.  
10  
11  
12  
13  
14  
15  
16  
17  
18  
19

20 **Funding:** This work was supported by SFO epidemiology (Karolinska  
21 Institutet, junior investigator award NB), Swedish Research Council (839-  
22 2008-7496), Swedish Cancer Society (CAN 2015/460). These funding  
23 sources had no role in the design and conduct of the study; collection,  
24 management, analysis, and interpretation of the data; and preparation,  
25 review, or approval of the manuscript.  
26  
27  
28  
29  
30  
31  
32  
33

34 **Competing interests:** none  
35  
36  
37

38 **Data sharing statement:** We are willing to share data upon request after  
39 ethics approval has been approved by the relevant committee and the  
40 governmental agencies that maintain the data.  
41  
42  
43  
44  
45  
46  
47  
48  
49  
50  
51  
52  
53  
54  
55  
56  
57  
58  
59  
60

## References

1. Balkwill F, Mantovani A. Inflammation and cancer: back to Virchow? *Lancet* 2001;**357**(9255):539-45 doi: 10.1016/s0140-6736(00)04046-0[published Online First: Epub Date]].
2. Simon LS, Yocum D. New and future drug therapies for rheumatoid arthritis. *Rheumatology (Oxford)* 2000;**39 Suppl 1**:36-42
3. Yang M, Wang HT, Zhao M, et al. Network Meta-Analysis Comparing Relatively Selective COX-2 Inhibitors Versus Coxibs for the Prevention of NSAID-Induced Gastrointestinal Injury. *Medicine* 2015;**94**(40):e1592 doi: 10.1097/MD.0000000000001592[published Online First: Epub Date]].
4. Sjodahl R. Nonsteroidal anti-inflammatory drugs and the gastrointestinal tract. Extent, mode, and dose dependence of anticancer effects. *Am J Med* 2001;**110**(1a):66s-69s
5. Huntjens DR, Danhof M, Della Pasqua OE. Pharmacokinetic-pharmacodynamic correlations and biomarkers in the development of COX-2 inhibitors. *Rheumatology (Oxford)* 2005;**44**(7):846-59 doi: 10.1093/rheumatology/keh627[published Online First: Epub Date]].
6. Bjarnason I, Thjodleifsson B. Gastrointestinal toxicity of non-steroidal anti-inflammatory drugs: the effect of nimesulide compared with naproxen on the human gastrointestinal tract. *Rheumatology (Oxford)* 1999;**38 Suppl 1**:24-32
7. Nissen SE, Yeomans ND, Solomon DH, et al. Cardiovascular Safety of Celecoxib, Naproxen, or Ibuprofen for Arthritis. *N Engl J Med* 2016;**375**(26):2519-29 doi: 10.1056/NEJMoa1611593[published Online First: Epub Date]].
8. Bakhriansyah M, Souverein PC, de Boer A, et al. Gastrointestinal toxicity among patients taking selective COX-2 inhibitors or conventional NSAIDs, alone or combined with proton pump inhibitors: a case-control study. *Pharmacoepidemiol Drug Saf* 2017 doi: 10.1002/pds.4183[published Online First: Epub Date]].

- 1  
2  
3 9. Capurso G, Schunemann HJ, Terrenato I, et al. Meta-analysis: the use of  
4 non-steroidal anti-inflammatory drugs and pancreatic cancer risk for  
5 different exposure categories. *Aliment Pharmacol Ther*  
6 2007;**26**(8):1089-99 doi: 10.1111/j.1365-2036.2007.03495.x[published  
7 Online First: Epub Date]].  
8  
9
- 10  
11 10. Tian W, Zhao Y, Liu S, et al. Meta-analysis on the relationship between  
12 nonsteroidal anti-inflammatory drug use and gastric cancer. *Eur J*  
13 *Cancer Prev* 2010;**19**(4):288-98 doi:  
14 10.1097/CEJ.0b013e328339648c[published Online First: Epub Date]].  
15
- 16  
17 11. Yang P, Zhou Y, Chen B, et al. Aspirin use and the risk of gastric cancer:  
18 a meta-analysis. *Dig Dis Sci* 2010;**55**(6):1533-9 doi: 10.1007/s10620-  
19 009-0915-0[published Online First: Epub Date]].  
20
- 21  
22 12. Ye X, Fu J, Yang Y, et al. Dose-risk and duration-risk relationships  
23 between aspirin and colorectal cancer: a meta-analysis of published  
24 cohort studies. *PLoS One* 2013;**8**(2):e57578 doi:  
25 10.1371/journal.pone.0057578[published Online First: Epub Date]].  
26
- 27  
28 13. Ye X, Fu J, Yang Y, et al. Frequency-risk and duration-risk relationships  
29 between aspirin use and gastric cancer: a systematic review and meta-  
30 analysis. *PLoS One* 2013;**8**(7):e71522 doi:  
31 10.1371/journal.pone.0071522[published Online First: Epub Date]].  
32
- 33  
34 14. Cui XJ, He Q, Zhang JM, et al. High-dose aspirin consumption contributes  
35 to decreased risk for pancreatic cancer in a systematic review and  
36 meta-analysis. *Pancreas* 2014;**43**(1):135-40 doi:  
37 10.1097/MPA.0b013e3182a8d41f[published Online First: Epub Date]].  
38
- 39  
40 15. Algra AM, Rothwell PM. Effects of regular aspirin on long-term cancer  
41 incidence and metastasis: a systematic comparison of evidence from  
42 observational studies versus randomised trials. *Lancet Oncol*  
43 2012;**13**(5):518-27 doi: 10.1016/S1470-2045(12)70112-2[published  
44 Online First: Epub Date]].  
45
- 46  
47 16. Sutcliffe P, Connock M, Gurung T, et al. Aspirin for prophylactic use in the  
48 primary prevention of cardiovascular disease and cancer: a systematic  
49 review and overview of reviews. *Health Technol Assess* 2013;**17**(43):1-  
50 253 doi: 10.3310/hta17430[published Online First: Epub Date]].  
51  
52  
53  
54  
55  
56  
57  
58  
59  
60

17. Cheung KS, Chan EW, Wong AYS, et al. Aspirin and Risk of Gastric Cancer After Helicobacter pylori Eradication: A Territory-Wide Study. LID - 10.1093/jnci/djx267 [doi]. (1460-2105 (Electronic))
18. Niikura R, Hayakawa Y, Hirata Y, et al. Distinct chemopreventive effects of aspirin in diffuse and intestinal-type gastric cancer. LID - canprevres.0276.2017 [pii] LID - 10.1158/1940-6207.CAPR-17-0276 [doi]. (1940-6215 (Electronic))
19. Imhann F, Bonder MJ, Vich Vila A, et al. Proton pump inhibitors affect the gut microbiome. Gut 2016;**65**(5):740-8 doi: 10.1136/gutjnl-2015-310376[published Online First: Epub Date]].
20. Alsalahi O, Dobrian AD. Proton Pump Inhibitors: The Culprit for Barrett's Esophagus? Front Oncol 2014;**4**:373 doi: 10.3389/fonc.2014.00373[published Online First: Epub Date]].
21. Kia L, Kahrilas PJ. Therapy: Risks associated with chronic PPI use - signal or noise? Nat Rev Gastroenterol Hepatol 2016 doi: 10.1038/nrgastro.2016.44[published Online First: Epub Date]].
22. Poulsen AH, Christensen S, McLaughlin JK, et al. Proton pump inhibitors and risk of gastric cancer: a population-based cohort study. Br J Cancer 2009;**100**(9):1503-7 doi: 10.1038/sj.bjc.6605024[published Online First: Epub Date]].
23. Statistics Sweden - Statistical Database Population Statistics (accessed 06 April 2016) <http://www.statistikdatabasen.scb.se/>. Secondary Statistics Sweden - Statistical Database Population Statistics (accessed 06 April 2016) <http://www.statistikdatabasen.scb.se/>. <http://www.statistikdatabasen.scb.se/>.
24. Sadr-Azodi O, Konings P, Brusselsaers N. Menopausal hormone therapy and pancreatic cancer risk in women: a population-based matched cohort study. United European gastroenterology journal 2017;**5**(8):1123-28 doi: 10.1177/2050640617702060[published Online First: Epub Date]].
25. Ma Y, Brusselsaers N. Maintenance use of aspirin or other non-steroidal anti-inflammatory drugs (NSAIDs) and prostate cancer risk. Prostate cancer and prostatic diseases 2017 doi: 10.1038/s41391-017-0021-x[published Online First: Epub Date]].

- 1  
2  
3 26. Brusselaers N, Wahlin K, Engstrand L, et al. Maintenance therapy with  
4 proton pump inhibitors and risk of gastric cancer: a nationwide  
5 population-based cohort study in Sweden. *BMJ Open*  
6 2017;**7**(10):e017739 doi: 10.1136/bmjopen-2017-017739[published  
7 Online First: Epub Date]].  
8  
9  
10  
11 27. Barlow L, Westergren K, Holmberg L, et al. The completeness of the  
12 Swedish Cancer Register: a sample survey for year 1998. *Acta Oncol*  
13 2009;**48**(1):27-33 doi: 902131375 [pii]  
14 10.1080/02841860802247664[published Online First: Epub Date]].  
15  
16 28. FASS (Farmaceutiska specialiteter i Sverige/ Pharmaceutical specialities in  
17 Sweden), 2015.  
18  
19 29. Läkemedelsverket (Medical Products Agency): Over-the-counter (OTC).  
20 Secondary Läkemedelsverket (Medical Products Agency): Over-the-  
21 counter (OTC) 2016.  
22 <https://lakemedelsverket.se/english/product/Medicinal-products/OTC/>.  
23  
24 30. Breslow N, Day N. *Statistical Methods in Cancer Research: The design*  
25 *and analysis of cohort studies*. Lyon, 1987.  
26  
27 31. Rothwell PM, Wilson M, Elwin CE, et al. Long-term effect of aspirin on  
28 colorectal cancer incidence and mortality: 20-year follow-up of five  
29 randomised trials. *Lancet* 2010;**376**(9754):1741-50 doi:  
30 10.1016/S0140-6736(10)61543-7[published Online First: Epub Date]].  
31  
32 32. Kyriazi V, Theodoulou E. Assessing the risk and prognosis of thrombotic  
33 complications in cancer patients. *Arch Pathol Lab Med*  
34 2013;**137**(9):1286-95 doi: 10.5858/arpa.2012-0490-RA[published  
35 Online First: Epub Date]].  
36  
37 33. Mercadante S. The use of anti-inflammatory drugs in cancer pain. *Cancer*  
38 *Treat Rev* 2001;**27**(1):51-61 doi: 10.1053/ctrv.2000.0192[published  
39 Online First: Epub Date]].  
40  
41 34. Din FV, Theodoratou E, Farrington SM, et al. Effect of aspirin and NSAIDs  
42 on risk and survival from colorectal cancer. *Gut* 2010;**59**(12):1670-9  
43 doi: 10.1136/gut.2009.203000[published Online First: Epub Date]].  
44  
45 35. Bosetti C, Rosato V, Gallus S, et al. Aspirin and cancer risk: a quantitative  
46 review to 2011. *Ann Oncol* 2012;**23**(6):1403-15 doi:  
47 10.1093/annonc/mds113[published Online First: Epub Date]].  
48  
49  
50  
51  
52  
53  
54  
55  
56  
57  
58  
59  
60

- 1  
2  
3 36. Jacobs EJ, Thun MJ, Bain EB, et al. A large cohort study of long-term  
4 daily use of adult-strength aspirin and cancer incidence. *J Natl Cancer*  
5 *Inst* 2007;**99**(8):608-15 doi: 10.1093/jnci/djk132[published Online First:  
6 Epub Date]].  
7  
8  
9 37. Smalley W, Ray WA, Daugherty J, et al. Use of nonsteroidal anti-  
10 inflammatory drugs and incidence of colorectal cancer: a population-  
11 based study. *Arch Intern Med* 1999;**159**(2):161-6  
12  
13 38. Cao Y, Nishihara R, Wu K, et al. Population-wide Impact of Long-term  
14 Use of Aspirin and the Risk for Cancer. *JAMA Oncol* 2016;**2**(6):762-9  
15 doi: 10.1001/jamaoncol.2015.6396[published Online First: Epub Date]].  
16  
17 39. Cheung KS, Chan EW, Wong AYS, et al. Long-term proton pump  
18 inhibitors and risk of gastric cancer development after treatment for  
19 *Helicobacter pylori*: a population-based study. *Gut* 2018;**67**(1):28-35  
20 doi: 10.1136/gutjnl-2017-314605[published Online First: Epub Date]].  
21  
22 40. Niikura R, Hayakawa Y, Hirata Y, et al. Long-term proton pump inhibitor  
23 use is a risk factor of gastric cancer after treatment for *Helicobacter*  
24 *pylori*: a retrospective cohort analysis. *Gut* 2017 doi: 10.1136/gutjnl-  
25 2017-315710[published Online First: Epub Date]].  
26  
27 41. Xie Y, Bowe B, Li T, et al. Risk of death among users of Proton Pump  
28 Inhibitors: a longitudinal observational cohort study of United States  
29 veterans. *BMJ Open* 2017;**7**(6):e015735 doi: 10.1136/bmjopen-2016-  
30 015735[published Online First: Epub Date]].  
31  
32 42. Li L, Geraghty OC, Mehta Z, et al. Age-specific risks, severity, time  
33 course, and outcome of bleeding on long-term antiplatelet treatment  
34 after vascular events: a population-based cohort study. *Lancet*  
35 2017;**390**(10093):490-99 doi: 10.1016/s0140-6736(17)30770-  
36 5[published Online First: Epub Date]].  
37  
38 43. Cuzick J, Thorat MA, Bosetti C, et al. Estimates of benefits and harms of  
39 prophylactic use of aspirin in the general population. *Ann Oncol*  
40 2015;**26**(1):47-57 doi: 10.1093/annonc/mdu225[published Online First:  
41 Epub Date]].  
42  
43  
44  
45  
46  
47  
48  
49  
50  
51  
52  
53  
54  
55  
56  
57  
58  
59  
60

**Table 1: Characteristics of the study cohort on therapy with aspirin, selective cyclo-oxygenase-2 (COX-2) inhibitors, and non-selective non-steroidal anti-inflammatory drug (NSAIDs).**

|                                        | <b>Aspirin only</b> | <b>Non-selective non-aspirin NSAIDs</b> | <b>Selective COX-2 inhibitors</b> |
|----------------------------------------|---------------------|-----------------------------------------|-----------------------------------|
|                                        | <i>Number (%)</i>   | <i>Number (%)</i>                       | <i>Number (%)</i>                 |
| Total                                  | 783,870             | 566,209                                 | 17,948                            |
| Sex                                    |                     |                                         |                                   |
| <i>Men</i>                             | 421,609 (53.8)      | 210,705 (37.2)                          | 7,201 (40.1)                      |
| <i>Women</i>                           | 362,261 (46.2)      | 355,504 (62.8)                          | 10,747 (59.9)                     |
| Age at first prescription              |                     |                                         |                                   |
| <i>&lt;40 years</i>                    | 12,189 (1.6)        | 110,592 (19.5)                          | 2,720 (15.2)                      |
| <i>40-49 years</i>                     | 32,743 (4.2)        | 125,977 (22.3)                          | 3,849 (21.5)                      |
| <i>50-59 years</i>                     | 108,683 (13.9)      | 146,981 (26.0)                          | 4,941 (27.5)                      |
| <i>60-69 years</i>                     | 200,154 (25.5)      | 112,682 (19.9)                          | 3,914 (21.8)                      |
| <i>≥70 years</i>                       | 430,101 (54.9)      | 69,977 (12.4)                           | 2,524 (14.1)                      |
| Calendar period at first prescription  |                     |                                         |                                   |
| <i>2005-2006</i>                       | 557,023 (71.1)      | 387,443 (68.4)                          | 10,393 (57.9)                     |
| <i>2007-2009</i>                       | 156,790 (20.0)      | 145,208 (25.7)                          | 5,500 (30.6)                      |
| <i>2010-2012</i>                       | 70,057 (8.9)        | 33,558 (5.9)                            | 2,055 (11.5)                      |
| Proton pump inhibitors use (≥180 days) |                     |                                         |                                   |
| <i>yes</i>                             | 200,828 (25.6)      | 148,586 (26.2)                          | 5,602 (31.2)                      |
| <i>no</i>                              | 583,042 (74.4)      | 417,623 (73.8)                          | 12,346 (68.8)                     |
| Statins use (≥180 days)                |                     |                                         |                                   |
| <i>yes</i>                             | 432,996 (55.2)      | 77,514 (13.7)                           | 2,589 (14.4)                      |
| <i>no</i>                              | 350,874 (44.8)      | 488,695 (86.3)                          | 15,359 (85.6)                     |
| Gastrointestinal cancer                | 10,969 (1.40)       | 3,428 (0.61)                            | 100 (0.56)                        |
| Oesophageal cancer                     | 539 (0.07)          | 134 (0.02)                              | 7 (0.04)                          |
| <i>Adenocarcinoma</i>                  | 319 (0.04)          | 75 (0.01)                               | 4 (0.02)                          |
| <i>Squamous cell carcinoma</i>         | 203 (0.03)          | 50 (0.01)                               | 2 (0.01)                          |
| Gastric cancer                         | 1,079 (0.14)        | 260 (0.05)                              | 7 (0.04)                          |
| <i>Adenocarcinoma</i>                  | 949 (0.12)          | 212 (0.04)                              | 3 (0.02)                          |
| Small bowel cancer                     | 253 (0.03)          | 94 (0.02)                               | 5 (0.03)                          |
| <i>Carcinoid</i>                       | 122 (0.02)          | 43 (0.01)                               | 2 (0.01)                          |
| Colorectal cancer                      | 6,919 (0.88)        | 2,017 (0.36)                            | 60 (0.33)                         |
| <i>Adenocarcinoma</i>                  | 6,608 (0.84)        | 1,887 (0.33)                            | 59 (0.33)                         |
| Liver cancer                           | 645 (0.08)          | 232 (0.04)                              | 3 (0.02)                          |
| <i>Hepatocellular carcinoma</i>        | 358 (0.05)          | 100 (0.02)                              | 1 (0.01)                          |
| <i>Cholangiocellular carcinoma</i>     | 81 (0.01)           | 41 (0.01)                               | 0 (0.00)                          |
| Gallbladder and biliary tract cancer   | 385 (0.05)          | 190 (0.03)                              | 5 (0.03)                          |
| <i>Adenocarcinoma</i>                  | 288 (0.04)          | 149 (0.03)                              | 2 (0.01)                          |
| Pancreatic cancer                      | 1,114 (0.14)        | 490 (0.09)                              | 13 (0.07)                         |
| <i>Adenocarcinoma</i>                  | 835 (0.11)          | 402 (0.07)                              | 11 (0.06)                         |

|                                       |             |             |             |
|---------------------------------------|-------------|-------------|-------------|
| Other gastrointestinal cancer         | 35 (0.00)   | 11 (0.00)   | 0 (0.00)    |
| Duration of follow-up in person-years |             |             |             |
| <i>Total</i>                          | 3,776,237   | 3,376,275   | 82,733      |
| <i>Mean (standard deviation)</i>      | 4.82 (2.40) | 5.96 (1.67) | 4.61 (2.21) |

For peer review only



**Table 2: The risk of different types of gastrointestinal cancer (and the major histological subtype) among users of aspirin and non-aspirin non-steroidal anti-inflammatory drugs (NSAIDs), expressed as standardized incidence ratios (SIRs) and 95% confidence intervals (CIs) and stratified by age and sex.**

|                                | Aspirin users (n=783,870) |                         | Non-selective non-aspirin NSAIDs users (n=566,209) |                         |
|--------------------------------|---------------------------|-------------------------|----------------------------------------------------|-------------------------|
|                                | Number of cases           | SIRS (95% CI)           | Number of cases                                    | SIRS (95% CI)           |
| <b>Gastrointestinal cancer</b> | <b>10,969</b>             | <b>1.02 (1.00-1.04)</b> | <b>3,428</b>                                       | <b>0.79 (0.77-0.82)</b> |
| <i>Men</i>                     | 6,659                     | 1.24 (1.21-1.27)        | 1,390                                              | 0.78 (0.74-0.82)        |
| <i>Women</i>                   | 4,310                     | 0.99 (0.96-1.02)        | 2,038                                              | 0.81 (0.77-0.84)        |
| 18-39 years                    | 3                         | -                       | 14                                                 | 0.59 (0.32-0.99)        |
| 40-49 years                    | 20                        | 0.70 (0.43-1.08)        | 116                                                | 0.67 (0.55-0.81)        |
| 50-59 years                    | 408                       | 1.13 (1.03-1.25)        | 423                                                | 0.61 (0.55-0.67)        |
| 60-69 years                    | 2,286                     | 1.13 (1.08-1.18)        | 1,074                                              | 0.71 (0.67-0.75)        |
| ≥70 years                      | 8,252                     | 0.99 (0.97-1.01)        | 1,801                                              | 0.94 (0.90-0.98)        |
| <b>Oesophageal cancer</b>      | <b>539</b>                | <b>1.10 (1.01-1.19)</b> | <b>134</b>                                         | <b>0.75 (0.63-0.89)</b> |
| <i>Adenocarcinoma</i>          | 319                       | 1.17 (1.04-1.30)        | 75                                                 | 0.81 (0.64-1.01)        |
| <i>Squamous cell carcinoma</i> | 203                       | 1.06 (0.92-1.22)        | 50                                                 | 0.66 (0.49-0.87)        |
| <i>Men</i>                     | 415                       | 1.09 (0.99-1.20)        | 90                                                 | 0.88 (0.63-0.97)        |
| <i>Women</i>                   | 124                       | 1.12 (0.93-1.33)        | 44                                                 | 0.68 (0.49-0.91)        |
| 18-39 years                    | 0                         | -                       | 0                                                  | -                       |
| 40-49 years                    | 1                         | -                       | 5                                                  | 0.87 (0.28-2.03)        |
| 50-59 years                    | 21                        | 0.99 (0.61-1.51)        | 18                                                 | 0.58 (0.34-0.92)        |
| 60-69 years                    | 164                       | 1.35 (1.15-1.57)        | 47                                                 | 0.65 (0.48-0.86)        |
| ≥70 years                      | 353                       | 1.02 (0.92-1.13)        | 64                                                 | 0.92 (0.71-1.18)        |
| <b>Gastric cancer</b>          | <b>1,079</b>              | <b>1.08 (1.01-1.14)</b> | <b>260</b>                                         | <b>0.70 (0.62-0.80)</b> |
| <i>Adenocarcinoma</i>          | 949                       | 1.07 (1.00-1.14)        | 212                                                | 0.66 (0.58-0.76)        |
| <i>Men</i>                     | 714                       | 1.08 (1.00-1.16)        | 128                                                | 0.72 (0.60-0.85)        |
| <i>Women</i>                   | 365                       | 1.08 (0.97-1.19)        | 132                                                | 0.69 (0.58-0.82)        |
| 18-39 years                    | 0                         | -                       | 1                                                  | -                       |
| 40-49 years                    | 3                         | -                       | 13                                                 | 0.71 (0.38-1.22)        |
| 50-59 years                    | 51                        | 1.48 (1.10-1.94)        | 37                                                 | 0.61 (0.43-0.85)        |
| 60-69 years                    | 208                       | 1.20 (1.04-1.37)        | 73                                                 | 0.61 (0.48-0.77)        |
| ≥70 years                      | 817                       | 1.03 (0.96-1.11)        | 136                                                | 0.81 (0.68-0.95)        |
| <b>Small bowel cancer</b>      | <b>253</b>                | <b>1.05 (0.93-1.19)</b> | <b>94</b>                                          | <b>0.84 (0.68-1.02)</b> |
| <i>Carcinoid</i>               | 122                       | 1.11 (0.92-1.32)        | 43                                                 | 0.84 (0.61-1.13)        |
| <i>Men</i>                     | 150                       | 1.05 (0.89-1.23)        | 34                                                 | 0.72 (0.50-1.00)        |
| <i>Women</i>                   | 103                       | 1.06 (0.86-1.28)        | 60                                                 | 0.93 (0.71-1.19)        |
| 18-39 years                    | 0                         | -                       | 1                                                  | -                       |
| 40-49 years                    | 1                         | -                       | 3                                                  | -                       |
| 50-59 years                    | 18                        | 1.53 (0.91-2.41)        | 18                                                 | 0.77 (0.46-1.22)        |

|                                             |                                    |              |                         |              |                         |
|---------------------------------------------|------------------------------------|--------------|-------------------------|--------------|-------------------------|
|                                             | 60-69 years                        | 64           | 1.16 (0.89-1.48)        | 33           | 0.81 (0.56-1.14)        |
|                                             | ≥70 years                          | 170          | 0.99 (0.85-1.15)        | 39           | 0.98 (0.69-1.34)        |
| <b>Colorectal cancer</b>                    |                                    | <b>6,919</b> | <b>1.00 (0.98-1.03)</b> | <b>2,017</b> | <b>0.74 (0.71-0.77)</b> |
|                                             | <i>Adenocarcinoma</i>              | 6,608        | 1.00 (0.80-1.03)        | 1,887        | 0.74 (0.70-0.77)        |
|                                             | <i>Men</i>                         | 4,105        | 1.03 (1.00-1.06)        | 793          | 0.73 (0.68-0.79)        |
|                                             | <i>Women</i>                       | 2,814        | 0.97 (0.93-1.00)        | 1,224        | 0.74 (0.70-0.78)        |
|                                             | 18-39 years                        | 2            | -                       | 10           | 0.61 (0.29-1.13)        |
|                                             | 40-49 years                        | 9            | 0.52 (0.24-0.98)        | 51           | 0.47 (0.35-0.62)        |
|                                             | 50-59 years                        | 241          | 1.16 (1.02-1.31)        | 232          | 0.55 (0.48-0.63)        |
|                                             | 60-69 years                        | 1,268        | 1.05 (0.99-1.11)        | 600          | 0.66 (0.60-0.71)        |
|                                             | ≥70 years                          | 5,399        | 0.99 (0.96-1.02)        | 1,124        | 0.88 (0.83-0.94)        |
| <b>Liver cancer</b>                         |                                    | <b>645</b>   | <b>1.11 (1.03-1.20)</b> | <b>232</b>   | <b>0.96 (0.84-1.09)</b> |
|                                             | <i>Hepatocellular carcinoma</i>    | 358          | 1.13 (1.02-1.25)        | 100          | 0.83 (0.77-1.01)        |
|                                             | <i>Cholangiocellular carcinoma</i> | 81           | 1.14 (0.91-1.42)        | 41           | 1.10 (0.79-1.49)        |
|                                             | <i>Men</i>                         | 449          | 1.12 (1.02-1.23)        | 130          | 1.00 (0.84-1.19)        |
|                                             | <i>Women</i>                       | 196          | 1.09 (0.94-1.26)        | 102          | 0.91 (0.74-1.10)        |
|                                             | 18-39 years                        | 0            | -                       | 3            | -                       |
|                                             | 40-49 years                        | 4            | -                       | 10           | 0.95 (0.46-1.75)        |
|                                             | 50-59 years                        | 32           | 1.04 (0.71-1.47)        | 44           | 0.90 (0.65-1.21)        |
|                                             | 60-69 years                        | 182          | 1.36 (1.17-1.57)        | 90           | 0.99 (0.79-1.21)        |
|                                             | ≥70 years                          | 427          | 1.03 (0.94-1.14)        | 85           | 0.95 (0.76-1.17)        |
| <b>Gallbladder and biliary tract cancer</b> |                                    | <b>385</b>   | <b>0.92 (0.83-1.01)</b> | <b>190</b>   | <b>1.03 (0.89-1.19)</b> |
|                                             | <i>Adenocarcinoma</i>              | 288          | 0.93 (0.82-1.04)        | 149          | 1.07 (0.90-1.25)        |
|                                             | <i>Men</i>                         | 181          | 1.00 (0.86-1.15)        | 50           | 0.98 (0.73-1.29)        |
|                                             | <i>Women</i>                       | 204          | 0.85 (0.74-0.80)        | 140          | 1.05 (0.88-1.24)        |
|                                             | 18-39 years                        | 0            | -                       | 1            | -                       |
|                                             | 40-49 years                        | 0            | -                       | 7            | 0.97 (0.39-2.00)        |
|                                             | 50-59 years                        | 6            | 0.52 (.19-1.13)         | 12           | 0.46 (0.24-0.80)        |
|                                             | 60-69 years                        | 91           | 1.31 (1.05-1.60)        | 63           | 1.00 (0.77-1.28)        |
|                                             | ≥70 years                          | 288          | 0.85 (0.76-0.96)        | 107          | 1.23 (1.00-1.48)        |
| <b>Pancreatic cancer</b>                    |                                    | <b>1,114</b> | <b>1.04 (0.98-1.11)</b> | <b>490</b>   | <b>1.00 (0.92-1.10)</b> |
|                                             | <i>Adenocarcinoma</i>              | 835          | 1.00 (0.93-1.07)        | 402          | 1.02 (0.92-1.13)        |
|                                             | <i>Men</i>                         | 629          | 1.07 (0.99-1.16)        | 163          | 0.89 (0.76-1.03)        |
|                                             | <i>Women</i>                       | 485          | 1.01 (0.92-1.11)        | 327          | 1.08 (0.96-1.20)        |
|                                             | 18-39 years                        | 1            | -                       | 1            | -                       |
|                                             | 40-49 years                        | 3            | -                       | 26           | 1.65 (1.08-2.42)        |
|                                             | 50-59 years                        | 37           | 0.91 (0.64-1.25)        | 68           | 0.86 (0.67-1.09)        |
|                                             | 60-69 years                        | 307          | 1.19 (1.06-1.33)        | 174          | 0.85 (0.73-0.99)        |
|                                             | ≥70 years                          | 766          | 1.00 (0.93-1.07)        | 221          | 1.18 (1.03-1.35)        |

**Table 3: The risk of gastrointestinal cancer among aspirin and non-aspirin non-steroidal anti-inflammatory drug (NSAID) users, by estimated duration of use, expressed as standardized incidence ratios (SIRs) and 95% confidence intervals (CIs).**

|                                | Aspirin only (n=783,870) |                 |                  | Non-selective non-aspirin NSAIDs (n=566,209) |                 |                  |
|--------------------------------|--------------------------|-----------------|------------------|----------------------------------------------|-----------------|------------------|
|                                | Categories (quartiles)   | Number of cases | SIRs (95% CI)    | Categories (quartiles)                       | Number of cases | SIRs (95% CI)    |
| <b>Gastrointestinal cancer</b> |                          |                 |                  |                                              |                 |                  |
|                                | 0.5-2.5 years            | 4,158           | 2.77 (2.69-2.85) | 0.5-0.7 years                                | 865             | 1.00 (0.93-1.06) |
|                                | 2.5-5.5 years            | 4,532           | 1.83 (1.77-1.88) | 0.7-1.1 years                                | 832             | 0.92 (0.86-0.98) |
|                                | 5.5-7.7 years            | 1,310           | 0.31 (0.30-0.33) | 1.1-2.1 years                                | 977             | 0.86 (0.80-0.91) |
|                                | >7.7 years               | 969             | 0.37 (0.35-0.40) | >2.1 years                                   | 754             | 0.54 (0.50-0.58) |
| <b>Oesophageal cancer</b>      |                          |                 |                  |                                              |                 |                  |
|                                | 0.5-2.5 years            | 204             | 2.91 (2.52-3.33) | 0.5-0.7 years                                | 35              | 0.93 (0.65-1.29) |
|                                | 2.5-5.5 years            | 216             | 1.83 (1.60-2.09) | 0.7-1.1 years                                | 32              | 0.84 (0.57-1.18) |
|                                | 5.5-7.7 years            | 61              | 0.31 (0.24-0.40) | 1.1-2.1 years                                | 43              | 0.91 (0.66-1.23) |
|                                | >7.7 years               | 58              | 0.56 (0.42-0.72) | >2.1 years                                   | 23              | 0.41 (0.26-0.61) |
| <b>Gastric cancer</b>          |                          |                 |                  |                                              |                 |                  |
|                                | 0.5-2.5 years            | 61              | 2.89 (2.62-3.19) | 0.5-0.7 years                                | 55              | 0.73 (0.55-0.95) |
|                                | 2.5-5.5 years            | 466             | 2.00 (1.82-2.19) | 0.7-1.1 years                                | 61              | 0.78 (0.60-1.01) |
|                                | 5.5-7.7 years            | 99              | 0.26 (0.21-0.31) | 1.1-2.1 years                                | 80              | 0.82 (0.65-1.02) |
|                                | >7.7 years               | 110             | 0.45 (0.37-0.55) | >2.1 years                                   | 64              | 0.54 (0.42-0.69) |
| <b>Small bowel cancer</b>      |                          |                 |                  |                                              |                 |                  |
|                                | 0.5-2.5 years            | 96              | 2.78 (2.25-3.39) | 0.5-0.7 years                                | 22              | 0.94 (0.59-1.43) |
|                                | 2.5-5.5 years            | 109             | 1.94 (1.59-2.33) | 0.7-1.1 years                                | 20              | 0.83 (0.51-1.29) |
|                                | 5.5-7.7 years            | 26              | 0.28 (0.18-0.41) | 1.1-2.1 years                                | 25              | 0.85 (0.55-1.25) |
|                                | >7.7 years               | 22              | 0.39 (0.25-0.60) | >2.1 years                                   | 27              | 0.76 (0.50-1.11) |
| <b>Colorectal cancer</b>       |                          |                 |                  |                                              |                 |                  |
|                                | 0.5-2.5 years            | 2,658           | 2.78 (2.67-2.88) | 0.5-0.7 years                                | 540             | 0.99 (0.91-1.08) |
|                                | 2.5-5.5 years            | 2,844           | 1.79 (1.73-1.86) | 0.7-1.1 years                                | 489             | 0.86 (0.78-0.94) |

|                                             |                      |     |                  |                      |     |                  |
|---------------------------------------------|----------------------|-----|------------------|----------------------|-----|------------------|
|                                             | <i>5.5-7.7 years</i> | 813 | 0.31 (0.29-0.33) | <i>1.1-2.1 years</i> | 565 | 0.78 (0.72-0.85) |
|                                             | <i>&gt;7.7 years</i> | 604 | 0.36 (0.33-0.39) | <i>&gt;2.1 years</i> | 423 | 0.47 (0.43-0.52) |
| <b>Liver cancer</b>                         | <i>0.5-2.5 years</i> | 222 | 2.63 (2.30-3.00) | <i>0.5-0.7 years</i> | 63  | 1.23 (0.95-1.57) |
|                                             | <i>2.5-5.5 years</i> | 272 | 1.96 (1.74-2.21) | <i>0.7-1.1 years</i> | 53  | 1.02 (0.76-1.33) |
|                                             | <i>5.5-7.7 years</i> | 100 | 0.44 (0.35-0.53) | <i>1.1-2.1 years</i> | 70  | 1.10 (0.86-1.39) |
|                                             | <i>&gt;7.7 years</i> | 51  | 0.40 (0.30-0.53) | <i>&gt;2.1 years</i> | 46  | 0.61 (0.45-0.81) |
| <b>Gallbladder and biliary tract cancer</b> | <i>0.5-2.5 years</i> | 137 | 2.36 (1.98-2.79) | <i>0.5-0.7 years</i> | 42  | 1.17 (0.85-1.58) |
|                                             | <i>2.5-5.5 years</i> | 143 | 1.52 (1.28-1.79) | <i>0.7-1.1 years</i> | 51  | 1.34 (1.00-1.76) |
|                                             | <i>5.5-7.7 years</i> | 61  | 0.39 (0.30-.50)  | <i>1.1-2.1 years</i> | 52  | 1.06 (0.79-1.39) |
|                                             | <i>&gt;7.7 years</i> | 44  | 0.40 (0.29-0.53) | <i>&gt;2.1 years</i> | 45  | 0.73 (0.53-0.98) |
| <b>Pancreatic cancer</b>                    | <i>0.5-2.5 years</i> | 424 | 2.79 (2.53-3.06) | <i>0.5-0.7 years</i> | 107 | 1.09 (0.90-1.32) |
|                                             | <i>2.5-5.5 years</i> | 467 | 1.87 (1.71-2.06) | <i>0.7-1.1 years</i> | 123 | 1.20 (1.00-1.43) |
|                                             | <i>5.5-7.7 years</i> | 149 | 0.36 (0.30-0.42) | <i>1.1-2.1 years</i> | 136 | 1.05 (0.88-1.25) |
|                                             | <i>&gt;7.7 years</i> | 74  | 0.28 (0.23-0.37) | <i>&gt;2.1 years</i> | 124 | 0.78 (0.65-0.93) |

**Table 4: The risk of gastrointestinal cancer among aspirin and non-selective non-aspirin non-steroidal anti-inflammatory drug (NSAID) users, stratified by additional use of proton pump inhibitors (PPIs) or statins compared to the total Swedish background population, expressed as standardized incidence ratios (SIRs) and 95% confidence intervals (CIs).**

|                                             | Aspirin users (n=783,870) |                      | Aspirin with PPI (n=200,828) |                      | Aspirin with statins (n=432,996) |                      |
|---------------------------------------------|---------------------------|----------------------|------------------------------|----------------------|----------------------------------|----------------------|
|                                             | <i>Number of cases</i>    | <i>SIRS (95% CI)</i> | <i>Number of cases</i>       | <i>SIRS (95% CI)</i> | <i>Number of cases</i>           | <i>SIRS (95% CI)</i> |
| <b>All gastrointestinal cancer</b>          | 10,969                    | 1.02 (1.00-1.04)     | 3,617                        | 1.25 (1.21-2.29)     | 6,210                            | 0.99 (0.96-1.01)     |
| <b>Oesophageal cancer</b>                   | 539                       | 1.10 (1.01-1.19)     | 247                          | 1.94 (1.71-2.20)     | 299                              | 0.98 (0.87-1.09)     |
| <b>Gastric cancer</b>                       | 1,079                     | 1.08 (1.01-1.14)     | 509                          | 1.89 (1.73-2.06)     | 619                              | 1.05 (0.98-1.13)     |
| <b>Small bowel cancer</b>                   | 253                       | 1.05 (0.93-1.19)     | 107                          | 1.67 (1.37-2.01)     | 139                              | 0.97 (0.81-1.14)     |
| <b>Colorectal cancer</b>                    | 6,919                     | 1.00 (0.98-1.03)     | 2,004                        | 1.07 (1.02-1.12)     | 3,893                            | 0.97 (0.94-1.00)     |
| <b>Liver cancer</b>                         | 645                       | 1.11 (1.03-1.20)     | 231                          | 1.52 (1.33-1.73)     | 351                              | 0.99 (0.89-1.10)     |
| <b>Gallbladder and biliary tract cancer</b> | 385                       | 0.92 (0.83-1.01)     | 117                          | 1.00 (0.82-1.19)     | 212                              | 0.90 (0.78-1.03)     |
| <b>Pancreatic cancer</b>                    | 1,114                     | 1.04 (0.98-1.11)     | 391                          | 1.36 (1.23-1.50)     | 678                              | 1.07 (0.99-2.15)     |

  

|                                             | Non-aspirin NSAIDs users (n=567,569) |                      | Non-selective non-aspirin with PPI (n=148,586) |                      | Non-selective non-aspirin with statins (n=77,514) |                      |
|---------------------------------------------|--------------------------------------|----------------------|------------------------------------------------|----------------------|---------------------------------------------------|----------------------|
|                                             | <i>Number of cases</i>               | <i>SIRS (95% CI)</i> | <i>Number of cases</i>                         | <i>SIRS (95% CI)</i> | <i>Number of cases</i>                            | <i>SIRS (95% CI)</i> |
| <b>All gastrointestinal cancer</b>          | 3,428                                | 0.79 (0.77-0.82)     | 1,360                                          | 1.08 (1.02-1.13)     | 625                                               | 0.71 (0.65-0.76)     |
| <b>Oesophageal cancer</b>                   | 134                                  | 0.75 (0.63-0.89)     | 67                                             | 1.36 (1.05-1.73)     | 24                                                | 0.64 (0.41-0.95)     |
| <b>Gastric cancer</b>                       | 260                                  | 0.70 (0.62-0.80)     | 156                                            | 1.47 (1.25-1.72)     | 44                                                | 0.58 (0.42-0.78)     |
| <b>Small bowel cancer</b>                   | 94                                   | 0.84 (0.68-1.02)     | 45                                             | 1.39 (1.02-1.87)     | 14                                                | 0.64 (0.35-1.07)     |
| <b>Colorectal cancer</b>                    | 2,017                                | 0.74 (0.71-0.77)     | 694                                            | 0.86 (0.80-0.93)     | 380                                               | 0.68 (0.61-0.75)     |
| <b>Liver cancer</b>                         | 232                                  | 0.96 (0.84-1.09)     | 102                                            | 1.51 (1.23-1.83)     | 38                                                | 0.78 (0.55-1.07)     |
| <b>Gallbladder and biliary tract cancer</b> | 190                                  | 1.03 (0.89-1.19)     | 68                                             | 1.21 (0.94-1.53)     | 29                                                | 0.76 (0.51-1.10)     |
| <b>Pancreatic cancer</b>                    | 490                                  | 1.00 (0.92-1.10)     | 222                                            | 1.55 (1.35-1.76)     | 93                                                | 0.92 (0.75-1.13)     |

## Online Supplement 1

Description of original cohort, the “Chemoprevention of Cancer” cohort, and flow-chart describing the selection of the study cohort.

For peer review only

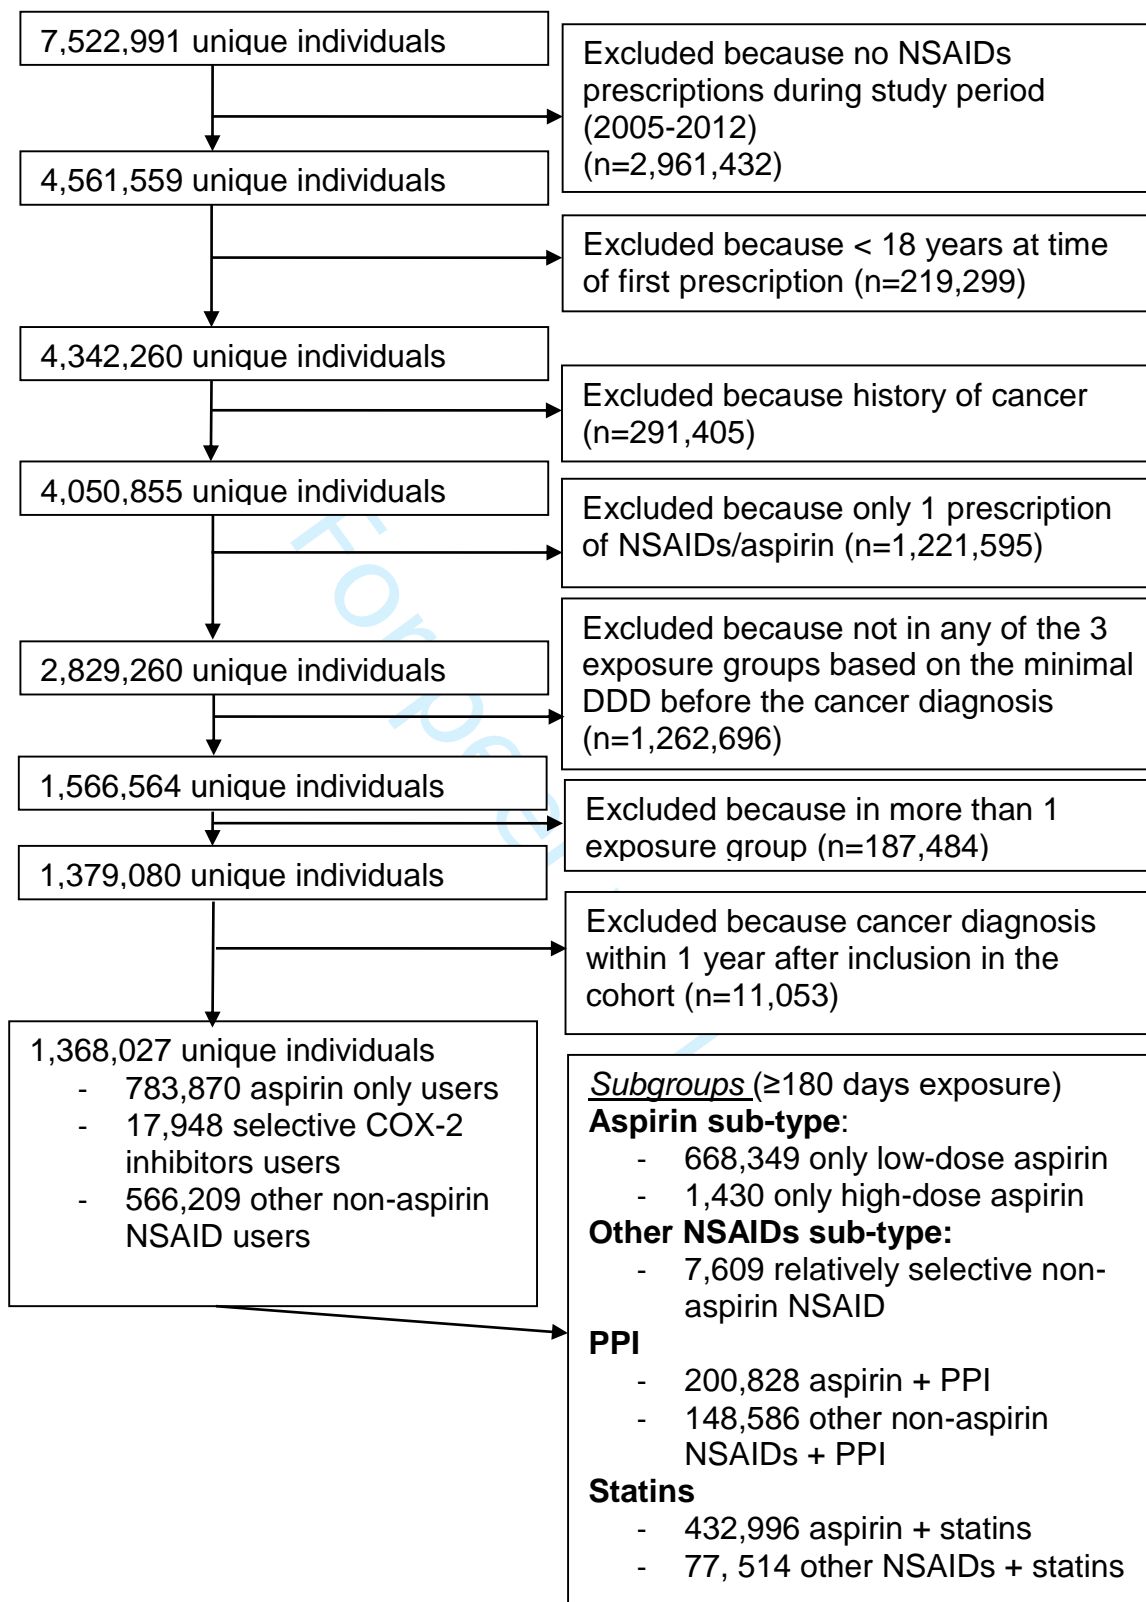

Abbreviations: COX, cyclooxygenase; DDD, defined daily dosage; NSAIDs, non-steroidal anti-inflammatory drugs; PPIs, proton pump inhibitors

1  
2 This cohort included all individuals residing in Sweden who received at least one  
3  
4 dispensed prescription of one of the following commonly prescribed drugs between July 1,  
5  
6 2005 and December 31, 2014 (with corresponding ATC codes) with follow-up for cancer  
7  
8 until December 2012: sex hormones (G03), drugs for peptic ulcers and gastro-esophageal  
9  
10 reflux disease (A02B), acetylsalicylic acid (B01AC06, N02BA), non-steroidal anti-  
11  
12 inflammatory drugs (M01A), HMG CoA reductase inhibitors (C10AA), drugs affecting bone  
13  
14 structure and mineralization, (M05B), and antibiotics (J01AA, J01CA04, J01FA, J01MA,  
15  
16 J01XD, J01XE, J04AB04). This cohort included approximately 85% of all Swedish  
17  
18 residents, with especially high coverage of adults.  
19  
20  
21  
22  
23  
24  
25  
26  
27  
28  
29  
30  
31  
32  
33  
34  
35  
36  
37  
38  
39  
40  
41  
42  
43  
44  
45  
46  
47  
48  
49  
50  
51  
52  
53  
54  
55  
56  
57  
58  
59  
60



**Supplement 2: Year of first prescription among aspirin and non-aspirin non-steroidal anti-inflammatory drugs (NSAIDs) users during the study period.**

|              | <b>Aspirin</b> | <b>Non-aspirin NSAIDs</b> |
|--------------|----------------|---------------------------|
|              | <i>N (%)</i>   | <i>N (%)</i>              |
| 2005         | 430,391 (54.9) | 240,848 (42.5)            |
| 2006         | 79,356 (10.1)  | 143,805 (25.4)            |
| 2007         | 60,071 (7.7)   | 71,053 (12.6)             |
| 2008         | 55,527 (7.1)   | 46,013 (8.1)              |
| 2009         | 49,885 (6.4)   | 29,814 (5.3)              |
| 2010         | 43,290 (5.5)   | 18,957 (3.4)              |
| 2011         | 38,415 (4.9)   | 11,736 (2.1)              |
| 2012         | 26,935 (3.4)   | 3,983 (0.7)               |
| <b>Total</b> | <b>783,87</b>  | <b>566,209</b>            |

For peer review only

**Supplement 3: The risk of gastrointestinal cancer among maintenance users of cyclo-oxygenase-2 (COX-2) selective inhibitors and relatively selective COX-2 inhibitors, and low-dose aspirin users, presented as standardized incidence ratios (SIRs) and 95% confidence intervals (CIs).**

|                                             | COX-2 selective inhibitors      |                      | Relatively selective COX-2                |                      | Low-dose aspirin |                      |
|---------------------------------------------|---------------------------------|----------------------|-------------------------------------------|----------------------|------------------|----------------------|
|                                             | maintenance users<br>(n=17,948) |                      | inhibitors maintenance<br>users (n=7,609) |                      | (n=668,305)      |                      |
|                                             | <i>Number</i>                   |                      | <i>Number</i>                             |                      | <i>Number</i>    |                      |
|                                             | <i>of cases</i>                 | <i>SIRS (95% CI)</i> | <i>of cases</i>                           | <i>SIRS (95% CI)</i> | <i>of cases</i>  | <i>SIRS (95% CI)</i> |
| <b>Gastrointestinal cancer</b>              | 100                             | 0.89 (0.73-1.09)     | 74                                        | 0.97 (0.76-1.21)     | 9,996            | 0.86 (0.85-0.88)     |
| <b>Oesophageal cancer</b>                   | 7                               | 1.49 (0.60-3.07)     | 1                                         | -                    | 493              | 0.99 (0.91-1.08)     |
| <b>Gastric cancer</b>                       | 7                               | 0.74 (0.30-1.52)     | 4                                         | -                    | 986              | 0.94 (0.88-1.00)     |
| <b>Small bowel cancer</b>                   | 5                               | 1.72 (0.55-4.00)     | 3                                         | -                    | 224              | 0.84 (0.74-0.96)     |
| <b>Colorectal cancer</b>                    | 60                              | 0.85 (0.65-1.09)     | 50                                        | 1.02 (0.76-1.35)     | 6,338            | 0.85 (0.83-0.88)     |
| <b>Liver cancer</b>                         | 3                               | -                    | 3                                         | -                    | 592              | 0.97 (0.89-1.05)     |
| <b>Gallbladder and biliary tract cancer</b> | 5                               | 1.05 (0.34-2.44)     | 3                                         | -                    | 344              | 0.74 (0.66-0.82)     |
| <b>Pancreatic cancer</b>                    | 13                              | 1.02 (0.54-1.74)     | 10                                        | 1.15 (0.55-2.12)     | 990              | 0.80 (0.75-0.85)     |

**Supplement 4: The risk of gastrointestinal cancer among aspirin and non-selective non-aspirin non-steroidal anti-inflammatory drug (NSAID) users comparing users with non-users of additional proton pump inhibitors (PPI) or statins, calculated with Poisson Regression models and expressed as incidence rate ratios (IRR) and 95% confidence intervals (CIs).**

|                                             | Non-selective                |                                 |                                         |                                                           |
|---------------------------------------------|------------------------------|---------------------------------|-----------------------------------------|-----------------------------------------------------------|
|                                             | Aspirin with PPI vs. without | Aspirin with statin vs. without | non-aspirin NSAIDs with PPI vs. without | Non-selective non-aspirin NSAIDs with statins vs. without |
|                                             | <i>IRR (95% CI)</i>          | <i>IRR (95% CI)</i>             | <i>IRR (95% CI)</i>                     | <i>IRR (95% CI)</i>                                       |
| <b>All gastrointestinal cancer</b>          | 1.19 (1.11-1.26)             | 0.81 (0.77-0.85)                | 1.61 (1.49-1.74)                        | 0.86 (0.76-0.96)                                          |
| <b>Oesophageal cancer</b>                   | 2.16 (1.67-2.80)             | 0.59 (0.47-0.75)                | 2.58 (1.77-3.75)                        | 0.65 (0.32-1.31)                                          |
| <b>Gastric cancer</b>                       | 2.26 (1.88-2.71)             | 0.81 (0.69-0.96)                | 3.68 (2.80-4.83)                        | 0.62 (0.34-1.11)                                          |
| <b>Small bowel cancer</b>                   | 1.65 (1.12-2.42)             | 0.65 (0.47-0.90)                | 2.20 (1.41-3.42)                        | 0.62 (0.26-1.47)                                          |
| <b>Colorectal cancer</b>                    | 0.98 (0.90-1.06)             | 0.85 (0.80-1.90)                | 1.30 (1.17-1.44)                        | 0.94 (0.81-1.08)                                          |
| <b>Liver cancer</b>                         | 1.56 (1.23-1.99)             | 0.64 (0.53-0.78)                | 2.12 (1.59-2.82)                        | 0.79 (0.49-1.27)                                          |
| <b>Gallbladder and biliary tract cancer</b> | 0.70 (0.49-1.02)             | 0.67 (0.52-0.86)                | 1.28 (0.92-1.77)                        | 0.67 (0.40-1.11)                                          |
| <b>Pancreatic cancer</b>                    | 1.32 (1.08-1.62)             | 0.90 (0.77-1.04)                | 1.88 (1.54-2.30)                        | 0.78 (0.55-1.09)                                          |

*Adjusted for age at first prescription, sex, and interaction between PPI and statins*

STROBE Statement—Checklist of items that should be included in reports of *cohort studies*

|                              | Item No | Recommendation                                                                                                                                                                                    | Page                          |
|------------------------------|---------|---------------------------------------------------------------------------------------------------------------------------------------------------------------------------------------------------|-------------------------------|
| <b>Title and abstract</b>    | 1       | (a) Indicate the study's design with a commonly used term in the title or the abstract                                                                                                            | p 1 & 3<br>(abstract & title) |
|                              |         | (b) Provide in the abstract an informative and balanced summary of what was done and what was found                                                                                               | p 3                           |
| <b>Introduction</b>          |         |                                                                                                                                                                                                   |                               |
| Background/rationale         | 2       | Explain the scientific background and rationale for the investigation being reported                                                                                                              | p 5-6                         |
| Objectives                   | 3       | State specific objectives, including any prespecified hypotheses                                                                                                                                  | p 6                           |
| <b>Methods</b>               |         |                                                                                                                                                                                                   |                               |
| Study design                 | 4       | Present key elements of study design early in the paper                                                                                                                                           | p 7-10                        |
| Setting                      | 5       | Describe the setting, locations, and relevant dates, including periods of recruitment, exposure, follow-up, and data collection                                                                   | p 7-10                        |
| Participants                 | 6       | (a) Give the eligibility criteria, and the sources and methods of selection of participants. Describe methods of follow-up                                                                        | p 7-10                        |
|                              |         | (b) For matched studies, give matching criteria and number of exposed and unexposed                                                                                                               | n/a                           |
| Variables                    | 7       | Clearly define all outcomes, exposures, predictors, potential confounders, and effect modifiers. Give diagnostic criteria, if applicable                                                          | p 7-10 +<br>appendix          |
| Data sources/<br>measurement | 8*      | For each variable of interest, give sources of data and details of methods of assessment (measurement). Describe comparability of assessment methods if there is more than one group              | p 7-10                        |
| Bias                         | 9       | Describe any efforts to address potential sources of bias                                                                                                                                         | p 7-10                        |
| Study size                   | 10      | Explain how the study size was arrived at                                                                                                                                                         | Fig 1                         |
| Quantitative variables       | 11      | Explain how quantitative variables were handled in the analyses. If applicable, describe which groupings were chosen and why                                                                      | p 7-10                        |
| Statistical methods          | 12      | (a) Describe all statistical methods, including those used to control for confounding                                                                                                             | p 9-10                        |
|                              |         | (b) Describe any methods used to examine subgroups and interactions                                                                                                                               | p 9-10                        |
|                              |         | (c) Explain how missing data were addressed                                                                                                                                                       | p 9-10                        |
|                              |         | (d) If applicable, explain how loss to follow-up was addressed                                                                                                                                    | n/a                           |
|                              |         | (e) Describe any sensitivity analyses                                                                                                                                                             | n/a                           |
| <b>Results</b>               |         |                                                                                                                                                                                                   |                               |
| Participants                 | 13*     | (a) Report numbers of individuals at each stage of study—eg numbers potentially eligible, examined for eligibility, confirmed eligible, included in the study, completing follow-up, and analysed | Fig 1                         |
|                              |         | (b) Give reasons for non-participation at each stage                                                                                                                                              | Fig 1                         |
|                              |         | (c) Consider use of a flow diagram                                                                                                                                                                | Fig 1                         |
| Descriptive data             | 14*     | (a) Give characteristics of study participants (eg demographic, clinical, social) and information on exposures and potential confounders                                                          | p 11, Table 1                 |
|                              |         | (b) Indicate number of participants with missing data for each variable of interest                                                                                                               | n/a                           |
|                              |         | (c) Summarise follow-up time (eg, average and total amount)                                                                                                                                       | Table 1                       |
| Outcome data                 | 15*     | Report numbers of outcome events or summary measures over time                                                                                                                                    | Tables 1-3                    |
| Main results                 | 16      | (a) Give unadjusted estimates and, if applicable, confounder-adjusted                                                                                                                             | Tables 2-4                    |

|                          |    |                                                                                                                                                                            |                   |
|--------------------------|----|----------------------------------------------------------------------------------------------------------------------------------------------------------------------------|-------------------|
|                          |    | estimates and their precision (eg, 95% confidence interval). Make clear which confounders were adjusted for and why they were included                                     |                   |
|                          |    | (b) Report category boundaries when continuous variables were categorized                                                                                                  | Table 1           |
|                          |    | (c) If relevant, consider translating estimates of relative risk into absolute risk for a meaningful time period                                                           |                   |
| Other analyses           | 17 | Report other analyses done—eg analyses of subgroups and interactions, and sensitivity analyses                                                                             | p 11-13, appendix |
| <b>Discussion</b>        |    |                                                                                                                                                                            |                   |
| Key results              | 18 | Summarise key results with reference to study objectives                                                                                                                   | p 14              |
| Limitations              | 19 | Discuss limitations of the study, taking into account sources of potential bias or imprecision. Discuss both direction and magnitude of any potential bias                 | p 14-17           |
| Interpretation           | 20 | Give a cautious overall interpretation of results considering objectives, limitations, multiplicity of analyses, results from similar studies, and other relevant evidence | p 14-17           |
| Generalisability         | 21 | Discuss the generalisability (external validity) of the study results                                                                                                      | p 14-17           |
| <b>Other information</b> |    |                                                                                                                                                                            |                   |
| Funding                  | 22 | Give the source of funding and the role of the funders for the present study and, if applicable, for the original study on which the present article is based              | p 3, p 17         |

\*Give information separately for exposed and unexposed groups.

**Note:** An Explanation and Elaboration article discusses each checklist item and gives methodological background and published examples of transparent reporting. The STROBE checklist is best used in conjunction with this article (freely available on the Web sites of PLoS Medicine at <http://www.plosmedicine.org/>, Annals of Internal Medicine at <http://www.annals.org/>, and Epidemiology at <http://www.epidem.com/>). Information on the STROBE Initiative is available at <http://www.strobe-statement.org>.

# BMJ Open

## Maintenance use of non-steroidal anti-inflammatory drugs and risk of gastrointestinal cancer in a nationwide population-based cohort study in Sweden

|                                 |                                                                                                                                                                                                                    |
|---------------------------------|--------------------------------------------------------------------------------------------------------------------------------------------------------------------------------------------------------------------|
| Journal:                        | <i>BMJ Open</i>                                                                                                                                                                                                    |
| Manuscript ID                   | bmjopen-2018-021869.R2                                                                                                                                                                                             |
| Article Type:                   | Research                                                                                                                                                                                                           |
| Date Submitted by the Author:   | 17-May-2018                                                                                                                                                                                                        |
| Complete List of Authors:       | Brusselaers, Nele; Karolinska Institutet, Molecular medicine and Surgery Lagergren, Jesper; Karolinska Institutet, Department of Molecular medicine and Surgery; King's College London, Division of Cancer Studies |
| <b>Primary Subject Heading</b>: | Epidemiology                                                                                                                                                                                                       |
| Secondary Subject Heading:      | Oncology, Pharmacology and therapeutics                                                                                                                                                                            |
| Keywords:                       | Gastrointestinal tumours < GASTROENTEROLOGY, chemoprevention, non-steroidal antiinflammatory drugs, aspirin, coxibs, cancer                                                                                        |
|                                 |                                                                                                                                                                                                                    |

SCHOLARONE™  
Manuscripts

1  
2  
3 **Maintenance use of non-steroidal anti-inflammatory drugs**  
4  
5 **and risk of gastrointestinal cancer in a nationwide population-**  
6  
7 **based cohort study in Sweden.**  
8  
9

10 **Running title: NSAIDs and gastrointestinal cancer prevention**

11 **Authors:** Nele BRUSSELAERS<sup>1,2</sup>, MD MSc PhD, Jesper LAGERGREN<sup>3,4</sup>,  
12  
13 MD PhD.  
14  
15

16 **Affiliations:**

17  
18 <sup>1</sup> Centre for Translational Microbiome Research, Department of Microbiology,  
19  
20 Tumor and Cell Biology, Karolinska Institutet, Karolinska Hospital, Stockholm,  
21  
22 Sweden  
23  
24

25 <sup>2</sup> Science for Life Laboratory (SciLifeLab), Stockholm, Sweden  
26

27 <sup>3</sup> Upper Gastrointestinal Surgery, Department of Molecular medicine and  
28  
29 Surgery, Karolinska Institutet, Karolinska University Hospital, Stockholm,  
30  
31 Sweden.  
32  
33

34 <sup>4</sup> Division of Cancer Studies, King's College London, United Kingdom.  
35  
36

37 **Correspondence and requests for reprints:** Dr. Nele Brusselaers, Centre for  
38  
39 Translational Microbiome Research, Department of Microbiology, Tumor and Cell  
40  
41 biology, Karolinska Institutet, Nobelsvag16, 171 77 Stockholm, Sweden.  
42  
43 E-mail: Nele.Brusselaers@ki.se, Tel: +46 8 524 853 08

44 **Email addresses authors:** [nele.brusselaers@ki.se](mailto:nele.brusselaers@ki.se); [jesper.lagergren@ki.se](mailto:jesper.lagergren@ki.se)  
45

46 **Word count: 3,7772 words; Tables: 4, Figures: 0; supplement: 4**  
47  
48  
49  
50  
51  
52  
53  
54  
55  
56  
57  
58  
59  
60

## Structured summary (239 words)

**Objectives:** Aspirin and other non-steroidal anti-inflammatory drugs (NSAIDs) are potential candidates for chemoprevention of gastrointestinal cancer. We aimed to assess the association between contemporary NSAID use ( $\geq 180$  days) and gastrointestinal cancer.

**Design:** Nationwide Swedish population-based cohort study (2005-2012,

**Setting:** Sweden

**Participants:** All adults exposed to maintenance NSAIDs use (aspirin,  $n=783,870$ ; unselective NSAIDs,  $n=566,209$ , selective COX-2 inhibitors,  $n=17,948$ ) compared to the Swedish background population of the same age, sex and calendar period.

**Outcome measures:** the risk of different gastro-intestinal cancer types expressed as standardized incidence ratios (SIR) and 95% confidence intervals (CI), taking into account concurrent proton-pump-inhibitors (PPIs) and statins usage.

**Results:** The SIR for gastro-intestinal cancer for aspirin-use was 1.02 (95%CI 1.00-1.04), with clearly reduced risk for long-term users (SIR=0.31, 95%CI 0.30-0.33 for 5.5-7.7 years), but an increased risk for short-term users (SIR=2.77, 95% CI 2.69-2.85), and stronger protective effect for low-dose aspirin (SIR=0.86, 95% CI 0.85-0.88). Users of non-selective NSAIDs showed an overall decreased risk of gastrointestinal cancer (SIR=0.79, 95%CI 0.77-0.82), in particular for cancer of the stomach, colorectum and oesophagus, and the SIRs were further decreased among long-term users. Users of selective COX-2 inhibitors showed a SIR=0.89 (95%CI 0.73-1.09) for gastrointestinal cancers. Both aspirin and unselective NSAIDs users who also



1  
2  
3 were using PPIs, had higher risks for all gastrointestinal cancer types; and  
4  
5 lower risk if using statins.  
6

7 **Conclusion:** Long-term use of (low-dose) aspirin and non-selective NSAIDs  
8  
9 was associated with a decreased risk of all gastrointestinal cancer types.  
10

11  
12  
13 **Key words:** gastro-intestinal cancer, chemoprevention, non-steroidal anti-  
14  
15 inflammatory drugs, aspirin, coxibs, cancer, pharmaco-epidemiology.  
16  
17  
18  
19  
20  
21  
22  
23  
24  
25  
26  
27  
28  
29  
30  
31  
32  
33  
34  
35  
36  
37  
38  
39  
40  
41  
42  
43  
44  
45  
46  
47  
48  
49  
50  
51  
52  
53  
54  
55  
56  
57  
58  
59  
60

### Article summary: Strengths and limitations of this study

- Population-based and nationwide design based on contemporary use of aspirin and other non-steroidal anti-inflammatory drugs (NSAIDs) – resulting in sufficient power to assess less common types of gastrointestinal cancer, and different formulations of NSAIDs.
- Concurrent maintenance use of statins and proton pump inhibitors is assessed.
- This study is based on real-life user information because of the population-based design, which leads to inherent problems of confounding by indication and reverse causality which were taken into account in the design and analyses.
- The findings are standardized for age, sex – which are often described as the major confounding factors in epidemiologic studies - and calendar time. Yet, other confounders could not be taken into account because the information was not available for the total background population.
- Exposure information is based on the Swedish Prescribed Drug Registry, which is initiated in July 2005 and has a complete nationwide coverage.

## Introduction

Inflammatory processes in tumour tissue are likely to contribute to tumour progression, immunosuppression and facilitate tumour growth, and cancer susceptibility and severity may also depend on different inflammatory responses.[1] Therefore, aspirin and other non-steroidal anti-inflammatory drugs (NSAIDs) are among the most promising candidates for chemoprevention of cancer, in particular tumours of the gastrointestinal tract. Despite the different indications for maintenance use of aspirin and non-aspirin NSAIDs, the underlying mechanisms are similar.[2 3] NSAIDs inhibit cyclo-oxygenase (COX), an enzyme responsible for the formation of thromboxane (a lipid acting as a vasoconstrictor, which also facilitates platelet aggregation) and prostaglandins (a messenger molecule in the inflammatory pathway); yet only aspirin permanently inhibits platelet formation.[4 5] There are 2 types of NSAIDs, inhibiting both COX-1 and COX-2, or only COX-2. COX-1 is expressed in most tissues regulating many physiological processes.[6] By inhibiting prostaglandin synthesis, NSAIDs compromise gastroduodenal defence mechanisms, including reducing blood flow and mucus and bicarbonate secretion, which may lead to dyspepsia and peptic ulcers, for which proton pump inhibitors (PPIs) are often prescribed as prevention or treatment.[5 6] COX-2 is expressed at sites of inflammation, and is the actual target of NSAIDs.[6] In contrast to non-selective COX-inhibitors (i.e. aspirin and most other NSAIDs), COX-2 selective inhibitors or coxibs are also weakly acidic, and therefore avoid substantial accumulation in (and damage of) the gastric mucosa.[6] Clinical studies have shown similar anti-inflammatory effects, a lower risk of gastrointestinal toxicity, yet a higher risk

1  
2  
3 of cardiovascular morbidity for COX-2 selective inhibitors compared to  
4 nonselective COX-inhibitors.[3 7 8] Some of the older NSAIDs are “relatively  
5 selective COX-2 inhibitors”, i.e. nabumetone, meloxicam, etodolac and  
6  
7 nimesulide.[3]  
8  
9

10  
11 However, epidemiological evidence to support a chemopreventive effect is still  
12 limited, mainly because large numbers are needed with a long follow-up, in  
13 particular for relatively rare cancer types. Meta-analyses have pooled the  
14 evidence of the gastrointestinal cancer preventive potential of aspirin and  
15 other NSAIDs.[9-14] A large meta-analysis[15] and another detailed scientific  
16 assessment[16] concluded that a preventive effect on colorectal cancer was  
17 especially pronounced in daily and long-term users (>5 years) in both  
18 interventional and observational studies,[15 16] with similar findings in recent  
19 studies on gastric cancer.[17 18] Yet, these studies used several different  
20 definitions of exposure, ranging from a single prescription of aspirin to daily  
21 use for >5 years, with too few studies reporting stratified analyses per dosage  
22 (or indication e.g. low dose anti-coagulants versus high dose analgesics) to  
23 draw reliable conclusions (although low dose has been recommended by  
24 individual studies).[15] The statistical power was too low to identify  
25 associations with many other types of (gastro-intestinal) cancer, and more,  
26 large original studies are needed to assess the potential preventive effect of  
27 other NSAIDs.[15]  
28  
29

30  
31 The role of PPI use on the association between NSAIDs with gastrointestinal  
32 cancer is insufficiently understood yet increasingly investigated, with growing  
33 evidence of carcinogenic and other long-term side-effects of PPIs[19-22] as  
34 also shown by our group.[23-25]  
35  
36  
37  
38  
39  
40  
41  
42  
43  
44  
45  
46  
47  
48  
49  
50  
51  
52  
53  
54  
55  
56  
57  
58  
59  
60

1  
2  
3 The objective of this study was to assess the association of aspirin and other  
4 NSAIDs on the risk of different gastrointestinal cancer types, while also  
5 assessing the potential influence of concomitant PPI use.  
6  
7  
8  
9  
10

## 11 **Material and Methods**

12  
13  
14 This nationwide Swedish population-based cohort study assessed the risk of  
15 gastrointestinal cancer in adult NSAIDs users,[26] compared to the risk in the  
16 entire Swedish background population of the corresponding sex, age and  
17 calendar year (7.1-7.6 million adults) as provided by Statistics Sweden. [27]  
18 [27] [27] Participants were enrolled during the study period from July 1, 2005  
19 (the start of the Swedish Prescribed Drug Registry) to December 31, 2012, as  
20 described in more detail elsewhere.[23 25 28 29] The cohort members were  
21 followed up until the occurrence of any cancer (excluding non-melanoma skin  
22 cancer), death or December 31, 2012 (i.e. the end of data collection for the  
23 Swedish Cancer Registry), whichever occurred first. Individuals with a history  
24 of any cancer were excluded, as well as individuals with a cancer diagnosis  
25 within 12 months after inclusion (to avoid reverse causation). The unique 10-  
26 digit personal identity number, assigned to each Swedish resident, was used  
27 for identification of all participants and for linkages of their individual data  
28 between registries. This study was conducted according to a detailed and a-  
29 priori established study protocol.  
30  
31  
32  
33  
34  
35  
36  
37  
38  
39  
40  
41  
42  
43  
44  
45  
46  
47  
48  
49  
50

### 51 **Data collection**

52  
53 The data for the present study were derived from our Chemoprevention of  
54 cancer cohort. The study protocol conforms to the ethical guidelines of the  
55  
56  
57  
58  
59  
60

1  
2  
3 1975 Declaration of Helsinki as reflected in a prior approval by the institution's  
4 human research committee, the Regional Ethical Review Board in Stockholm,  
5 without need for informed consent (2014/1291-31/4, approved 27 AUG  
6 2014)(see Supplement 1 and [25 26 30]). This data collection originates from  
7 the nationwide complete Swedish Prescribed Drug Registry, and includes all  
8 individuals residing in Sweden who have collected at least one dispensed  
9 prescription of any commonly prescribed drug between July 1, 2005 and  
10 December 31, 2014 (approximately 85% of all Swedish residents); with follow-  
11 up for cancer until December 31, 2012. This cohort has been linked to two  
12 other high-quality and complete nationwide Swedish registries, i.e. the  
13 Swedish Cancer Registry (>96% completeness of all cancers, originated in  
14 1961),[31] and the Swedish Causes of Death Registry (>99% completeness,  
15 originated in 1952), by means of the personal identity number.  
16  
17  
18  
19  
20  
21  
22  
23  
24  
25  
26  
27  
28  
29  
30  
31  
32

### 33 **Exposures**

34  
35 Therapy with systemic NSAIDs was defined as at least 6 months ( $\geq 180$  days)  
36 cumulative exposure during the study period. This was a cumulative exposure  
37 based on the defined daily dosage (DDD) per prescribed package, which  
38 takes into account the potency of the drug as well as the prescribed quantity.  
39  
40 Three main types of NSAIDs were categorized based on their mechanisms of  
41 action (selective or non-selective COX inhibition) and drug class (aspirin or  
42 non-aspirin NSAIDs) with corresponding Anatomical Therapeutic Chemical  
43 classification codes (ATC): 1) aspirin (B01AC06, N02BA), 2) selective COX-2  
44 inhibitors (coxibs, M01AH), and 3) non-selective non-aspirin NSAIDs  
45  
46 (remaining M01A codes). Individuals with  $\geq 180$  days of exposure to 2 or 3 of  
47  
48  
49  
50  
51  
52  
53  
54  
55  
56  
57  
58  
59  
60

1  
2  
3 these groups were excluded, so the 3 groups are mutually exclusive. Users of  
4 combination preparations including aspirin, i.e. with corticosteroid (M01BA03),  
5 PPIs (B01AC56), statins (C10BX), as well as preparations for local (oral) use  
6 (A01AD05) were also excluded.

7  
8  
9  
10  
11 Additionally, the relatively selective COX-2 inhibitors, a subgroup of the non-  
12 selective NSAID users, containing meloxicam (M01AC06) and nabumetone  
13 (M01AX01), were also analysed separately. Aspirin users were also divided in  
14 2 groups according to their ATC code ( $\geq 180$  days): low dose (B01AC06), and  
15 high dose aspirin (N02BA) (those using both for  $\geq 180$  days were  
16 excluded).[32] High-dose aspirin (N02BA) and some other NSAIDs  
17 (Diclofenac, M01AB05 and Ibuprofen, M01AE01) are also available over the  
18 counter in Sweden, but they are sold in only small packages and at higher  
19 prices per dose.[32 33] Thus, we can assume that maintenance users had  
20 their doses prescribed, and were thus recorded in the present study.  
21  
22  
23  
24  
25  
26  
27  
28  
29  
30  
31  
32  
33  
34

### 35 **Outcomes**

36  
37 The outcome was a first gastrointestinal cancer diagnosis recorded in the  
38 Swedish Cancer Registry according to the International Classification of  
39 Diseases (ICD) 10<sup>th</sup> edition, including all cancers of the alimentary and  
40 hepatobiliary tract. Gastrointestinal cancers were categorized as follows: any  
41 gastrointestinal cancer (C15-C26) or cancer of the oesophagus (C15),  
42 stomach (C16), small bowel (C17), colorectum (C18-C21), liver, including  
43 intrahepatic bile ducts (C22), gallbladder or extrahepatic bile ducts (C23-24),  
44 or pancreas (C25). The category “other gastrointestinal cancer” (C26) was not  
45 analysed separately. Additionally, the most common histological tumour types  
46  
47  
48  
49  
50  
51  
52  
53  
54  
55  
56  
57  
58  
59  
60

1  
2  
3 were analysed separately: adenocarcinoma (code 096) for oesophageal,  
4 gastric, gallbladder/biliary tract, pancreas and colorectal cancer; squamous  
5 cell carcinoma (code 146) for oesophageal cancer; hepatocellular carcinoma  
6 (code 066) and cholangiocarcinoma (code 076) for liver cancer; and carcinoid  
7 (code 086) for small bowel cancer.  
8  
9  
10  
11  
12  
13  
14  
15  
16

### 17 **Statistical analyses**

18  
19 The relative risks of developing gastrointestinal cancer in individuals exposed  
20 to the drugs under study were standardized using the Swedish background  
21 population of the corresponding age, sex, and calendar period. Standardized  
22 incidence ratios (SIRs) and 95% confidence intervals (CIs) were calculated,  
23 while accounting for changes in age and calendar categories when calculating  
24 years of follow-up.[34] Follow-up time was counted from the dispense date of  
25 the first NSAID prescription to the date of a first cancer diagnosis, death, or  
26 the end of the study (31<sup>st</sup> December 2012), whichever occurred first. The  
27 expected incidence rates were calculated from cancer data recorded in the  
28 Swedish Cancer Registry and the age-stratified number of individuals per  
29 calendar year according to Statistics Sweden (Population Statistics). The  
30 overall SIR for gastrointestinal cancer was calculated, as well as SIRs for  
31 each anatomical location separately, including sub-analyses for the most  
32 common histological types. The analyses were also stratified for sex and age  
33 for each cancer type. Subgroup analyses were performed for high-dose and  
34 low-dose aspirin, users of relatively selective COX-2 inhibitors, NSAID use  
35 with concurrent PPI (A02BC) or statin (C10AA) use ( $\geq 180$  days) if the groups  
36 were sufficiently large. To assess the effect of PPI and statins, a multivariable  
37  
38  
39  
40  
41  
42  
43  
44  
45  
46  
47  
48  
49  
50  
51  
52  
53  
54  
55  
56  
57  
58  
59  
60



1  
2  
3 Poisson regression model was fitted, adjusting for age at first prescription, sex  
4 and interaction between PPI and statins, and presented as incidence rate  
5 ratios (IRR) and 95%CI. The duration of the exposures was assessed by  
6 dividing the total cumulative dosage (sum of DDDs per package) received  
7 before the cancer diagnosis into four equally sized groups (quartiles), yet their  
8 total follow-up time was taken into account for the analyses. There were no  
9 missing data on exposures, outcomes or confounding variables. Effect  
10 estimates were only reported when at least 5 individuals developed the  
11 outcome.  
12  
13  
14  
15  
16  
17  
18  
19  
20  
21  
22  
23

### 24 ***Patient involvement***

25  
26 The Swedish patient organization for cancer of the esophagus, stomach, liver,  
27 and pancreas was involved in supporting the present study  
28 ([www.palema.org](http://www.palema.org)). The development of the research question and outcome  
29 measures were informed by patients' priorities, experience, and preferences.  
30  
31 The results will be disseminated to study participants by means of patient  
32 organizations. Patients are thanked in the acknowledgements.  
33  
34  
35  
36  
37  
38  
39  
40  
41  
42

### 43 **Results**

44 Among all 1,368,027 users of NSAIDs, there were 783,870 (57.3%) aspirin  
45 users, 566,209 (41.4%) non-selective NSAIDs users, and 17,948 (1.3%)  
46 COX-2 users (Table 1, Supplement 1). Aspirin users were more likely to be  
47 male (53.8%) and older than 70 years (54.9.2%), while non-selective NSAID  
48 users and COX-2 users were predominantly female (62.8% and 59.9%,  
49 respectively) and between 40 and 70 years of age (68.2% and 70.8%,  
50  
51  
52  
53  
54  
55  
56  
57  
58  
59  
60

1  
2  
3 respectively). Use of PPIs was found in 25.6%, 26.2%, and 31.2% of the  
4  
5 aspirin users, non-selective NSAIDs users, and COX-2 users, respectively;  
6  
7 and use of statins in 55.2%, 13.7% and 14.4%, respectively. The majority of  
8  
9 the population received their first prescription during the first half year of the  
10  
11 study period (2005), 54.9% of aspirin users, and 42.5% of non-selective  
12  
13 NSAIDs users (Supplement 2).  
14  
15

### 16 17 18 **Aspirin**

19  
20 As presented in Table 1, 10,969 (1.40%) aspirin users developed some type  
21  
22 of gastrointestinal cancer during the follow-up. The most common cancer sites  
23  
24 were colorectal (n=6,919; 0.88%), gastric (n=1,079; 0.14%), and pancreatic  
25  
26 (n=1,114; 0.14%). There was no association with gastrointestinal cancer  
27  
28 based on the overall SIRs for aspirin users (SIR=1.02, 95% CI 1.00-1.04)  
29  
30 (Table 2). Shorter duration of use (<5.5 years) seemed to be associated with  
31  
32 an increased risk for all gastro-intestinal cancers. Yet, longer duration of  
33  
34 aspirin use was followed by a decreased SIR for gastrointestinal cancer  
35  
36 (SIR=0.31, 95% CI 0.30-0.33 for those with an estimated use between 5.5-7.7  
37  
38 years, and SIR=0.37, 95%CI 0.35-0.40 for >7.7 years) (Table 3) and long-  
39  
40 term aspirin users had clearly decreased SIRs for each gastrointestinal  
41  
42 cancer type (Table 3). The subgroup analyses including only the low-dosage  
43  
44 aspirin users (N=668,305, 85.3% of the aspirin cohort) showed lower SIRs for  
45  
46 all cancer locations, with significantly reduced risks for all locations except for  
47  
48 oesophageal, gastric and liver cancer (Supplement 3).  
49  
50  
51  
52  
53

### 54 55 **Non-selective NSAIDs**

1  
2  
3 Table 1 shows that 3,428 (0.61%) of the non-selective NSAID users  
4 developed cancer, mainly colorectal (n=2,017; 0.36%), pancreatic (n=490;  
5 0.09%), and gastric cancers (n=260; 0.05%). Overall, there was a decreased  
6 risk of gastrointestinal cancer (SIR=0.79, 95%CI 0.77-0.82), and also for  
7 gastric (SIR=0.70, 95% CI 0.62-0.80), colorectal (SIR=0.74, 95% CI 0.71-  
8 0.77) and oesophageal (SIR=0.75, 95% CI 0.63-0.89) cancers analysed  
9 separately (and their main histological subtypes) (Table 2). There was no  
10 evidence of decreased SIRs for the other types of gastrointestinal cancer  
11 types, although the effect sizes indicated a decreased SIR of small bowel and  
12 liver cancer. Longer duration of use of non-selective NSAIDs was associated  
13 with a decreased gastrointestinal cancer risk for all anatomical locations  
14 (Table 3).  
15  
16  
17  
18  
19  
20  
21  
22  
23  
24  
25  
26  
27  
28  
29  
30

### 31 **Selective COX-2 inhibitors**

32  
33 Overall, 100 (0.56%) COX-2 users developed some type of gastrointestinal  
34 cancer, predominantly colorectal (n=60; 0.33%), pancreatic (n=13; 0.07%),  
35 gastric (n=7; 0.04%), and oesophageal cancers (n=7; 0.04%). There was  
36 some evidence for a decreased risk of gastrointestinal cancer overall  
37 (SIR=0.89, 95% CI 0.73-1.09), although not statistically significant. None of  
38 the sub-analyses showed strong evidence for an association (Supplement 3).  
39  
40  
41  
42  
43  
44  
45  
46  
47

### 48 **Relatively selective COX-2 inhibitors**

49  
50 Among the non-selective NSAIDs users, 7,609 individuals used relatively  
51 selective COX-2 inhibitors, of whom 74 (0.01%) developed cancer. There was  
52  
53  
54  
55  
56  
57  
58  
59  
60

1  
2  
3 no evidence for an association with any of the gastrointestinal cancer  
4 locations (Supplement 3).  
5  
6  
7

### 8 9 ***Aspirin with PPIs or statins***

10  
11 Users of aspirin with concomitant use of PPIs had higher SIRs for all  
12 gastrointestinal cancers compared to those not using PPIs, with all SIRs  
13 indicating an increased risk except for gallbladder cancer (Table 4). The SIRs  
14 were especially increased for gastric cancer (SIR=1.89; 95% CI 1.73-2.06)  
15 and oesophageal cancer (SIR=1.94; 95% CI 1.71-2.20). When using Poisson  
16 regression to compare aspirin users using PPIs directly with aspirin users not  
17 using PPIs (instead of using the background population as reference), the risk  
18 was increased for all gastrointestinal cancers (IRR=1.19, 95% CI 1.11-1.26),  
19 with significantly increased risks for oesophageal, gastric, small bowel, liver  
20 and pancreatic cancer (Supplement 4).  
21  
22  
23  
24  
25  
26  
27  
28  
29  
30  
31  
32

33 Among aspirin users exposed to statins, the SIRs were close to unity for each  
34 anatomical location (Table 4). When aspirin users using statins were directly  
35 compared with aspirin users not using statins, risks were decreased for all  
36 gastrointestinal cancers (IRR=0.81, 95% CI 0.77-0.85), with significant  
37 decreases for all cancer locations except for colorectal and pancreatic cancer  
38 (Supplement 4).  
39  
40  
41  
42  
43  
44  
45  
46  
47

### 48 ***Non-selective NSAIDs with PPIs or statins***

49  
50 In users of non-selective NSAIDs on therapy with PPIs, the SIRs were  
51 increased for all gastrointestinal cancer types (and again higher than among  
52 those not using PPIs), except for colorectal cancer (Table 4). When users of  
53  
54  
55  
56  
57  
58  
59  
60

1  
2  
3 non-selective NSAIDs using PPIs were directly compared with those not using  
4 PPIs, risks were increased for all gastrointestinal cancers (IRR=1.61, 95% CI  
5 1.49-1.74), and each individual cancer location except for gallbladder cancer  
6 (Supplement 4). Among non-selective NSAIDs users using statins, the SIRs  
7 were lower than among all users of non-selective NSAIDs, and significantly  
8 reduced for oesophageal, gastric and colorectal cancer. When users of non-  
9 selective NSAIDs using statins were directly compared with those not using  
10 statins, risks were decreased for all gastrointestinal cancers (IRR=0.86, 95%  
11 CI 0.76-0.96), yet not significant for the individual cancer locations  
12 (Supplement 4).  
13  
14  
15  
16  
17  
18  
19  
20  
21  
22  
23  
24  
25  
26

## 27 **Discussion**

28  
29 This study on contemporary use of NSAIDs showed a decreased risk of all  
30 types of gastrointestinal cancer among long-term users of aspirin (>5.5 years)  
31 and non-selective NSAIDs users even for shorter duration of use (>0.7 years).  
32  
33 Long-term users of non-selective NSAIDs were at a particularly decreased  
34 risk for gastric, oesophageal, and colorectal cancers. These seemingly  
35 protective associations might be counteracted by concomitant PPI therapy,  
36 and enhanced by concomitant statin use.  
37  
38  
39  
40  
41  
42  
43  
44  
45  
46

47 The main strengths of this study are the population-based design and large  
48 sample size, including all adults residing in Sweden during the study period,  
49 which enabled separate analyses for contemporary use of different types of  
50 NSAIDs, and evaluation of less common types of gastrointestinal cancer  
51 which could not be assessed previously because of insufficient power, in  
52  
53  
54  
55  
56  
57  
58  
59  
60

1  
2  
3 particular for non-aspirin NSAIDs. Other advantages include the complete  
4 follow-up and accurate censoring for mortality. The data on the exposures  
5 (medications) and outcomes (gastrointestinal cancers) were highly accurate  
6 due to the validity and completeness of the Swedish registries, eliminating  
7 recall bias.  
8  
9  
10  
11  
12

13  
14  
15 Although our findings for aspirin are largely consistent with the literature, that  
16 the protective effect is only seen after 5 years, reverse causation, confounding  
17 and/or bias appear to influence the aspirin analyses because of the apparent  
18 initial increased risk of cancer among short-term users. By excluding all  
19 individuals diagnosed with cancer within a year after enrolment, and only  
20 including those with a minimal accumulated duration of use of 6 months, the  
21 risk of reverse causation should be reduced. Yet, our results indicate that  
22 those with an estimated duration shorter than 5 years have an apparent  
23 increased risk, which might be because they take aspirin because of yet  
24 undiagnosed cancer-related pain or thrombotic events – indicating  
25 confounding by indication and reverse causation among the group with the  
26 shortest exposure time, an effect which could not have been detected in  
27 intervention trials or in case-control studies with a study-design-inherent more  
28 restrictive selection of study participants.[15 35] As previous studies reported,  
29 15-20% of cancer patients have thrombotic complications during the course of  
30 the disease (often as early manifestation of an occult malignancy),[36] yet  
31 these complications (e.g. deep venous thrombosis) are more likely to be  
32 treated with anti-coagulants than aspirin. However, when only looking at those  
33 exclusively using low-dose aspirin for  $\geq 180$  days, i.e. the platelet aggregation  
34  
35  
36  
37  
38  
39  
40  
41  
42  
43  
44  
45  
46  
47  
48  
49  
50  
51  
52  
53  
54  
55  
56  
57  
58  
59  
60

1  
2  
3 inhibitors, the protective effects were also visible in the overall analyses non  
4 taking into account duration, with SIR=0.86 (95%CI 0.85-0.88). This indicates  
5 that the apparent increased risks are mainly because of the small group using  
6 aspirin as analgesic (high dose), which shows it is important to distinguish  
7 between both groups of aspirin-use. Reverse causality seems to be less of a  
8 problem for other NSAIDs users, although these may be used as  
9 analgesics.[37] Yet, individuals using NSAIDs may be at a lower a-priori risk  
10 of developing gastro-intestinal cancer, because individuals with upper gastro-  
11 intestinal symptoms are less likely to be chronic NSAIDs users due to the risk  
12 of gastro-intestinal side-effects.

13  
14 Especially for aspirin users (with a high cardiovascular mortality, higher  
15 average age than NSAIDs users and more chronic comorbidities), death is a  
16 competing risk for the development of cancer, reducing the number at risk to  
17 develop cancer. Therefore, we censored follow-up time at time of death. In  
18 this cohort the standardised mortality risks were 9.64 (95%CI 9.60-9.69) for  
19 aspirin users and 2.08 (95% CI 2.05-2.11) for non-selective non-aspirin  
20 NSAIDs users indeed showing a higher risk of death competing with the risk  
21 of cancer, leading to an overestimation of the protective effect in particular  
22 among aspirin users

23  
24  
25  
26  
27  
28  
29  
30  
31  
32  
33  
34  
35  
36  
37  
38  
39  
40  
41  
42  
43  
44  
45  
46 Another limitation is potential confounding, e.g. by socio-economic status,  
47 dietary factors, obesity, tobacco smoking, and alcohol consumption, which  
48 could not be taken into account since such information was not available for  
49 the total background population. However, we adjusted for age, sex and  
50 calendar period. Cancer-type specific confounders and their treatment such  
51  
52  
53  
54  
55  
56  
57  
58  
59  
60

1  
2  
3 as *Helicobacter pylori* for gastric cancer, hepatitis B/C infection for liver cancer  
4  
5 and chronic inflammatory diseases such as inflammatory bowel disease for  
6  
7 bowel cancer and pancreatitis for pancreatic cancer, may also have  
8  
9 contributed to the risk of cancer and timing of diagnosis. We may have  
10  
11 incomplete exposure ascertainment (and underestimation of duration of use)  
12  
13 for part of our cohort since no information was available on prescriptions  
14  
15 before July 2005 or over-the-counter use. Yet, potential long-term (protective)  
16  
17 effects may be expected to decrease gradually yet significantly after treatment  
18  
19 cessation, reducing the potential effect of misclassification on our results due  
20  
21 to exposure before 2005. We used the minimal exposure criterion of 180 days  
22  
23 to exclude occasional users who are more likely to obtain their NSAIDs over-  
24  
25 the-counter, so at a higher price. We did not have data on used daily dosage  
26  
27 or duration of use, and used a proxy variable for duration based on  
28  
29 accumulation of the average DDDs per package. This explains why some  
30  
31 aspirin users had an estimated exposure time longer than the duration of  
32  
33 follow-up, indicating a high daily dose. The high variability in actual and  
34  
35 estimated administered dosage also hindered assessment of recency of use.  
36  
37 Some previous studies subdivided aspirin use into “low dose” and “high dose”  
38  
39 based on prescribed dosages (e.g. <75 mg/day[38] or <100 mg/day[14]), but  
40  
41 since we did not have information on the number of prescribed pills per day,  
42  
43 and different dosages could have been prescribed during the study period, we  
44  
45 used the definition based on ATC coding and assessed the estimated  
46  
47 duration of use, with the additional advantage that the low-dose aspirin was  
48  
49 only available on prescription. This should also be a more accurate reflection  
50  
51 of duration of use than the number of prescriptions.[9] In our study, the DDD  
52  
53  
54  
55  
56  
57  
58  
59  
60



1  
2  
3 per package could range from <5 to 500 (for other NSAIDs) or 1000 (for  
4 aspirin), which illustrates the variation between prescriptions. Since 1.4 million  
5 individuals were exposed to NSAIDs ( $\geq 180$  days), i.e. one fifth of the adult  
6 population in Sweden, our results are likely to be diluted since we compared  
7 them with the total background population. Yet, despite this dilution the  
8 associations among long-term users were strongly decreased.  
9  
10  
11  
12  
13  
14

15  
16  
17  
18 Compared to previous studies, this study was better powered to separately  
19 analyses different gastrointestinal cancers and types of NSAIDs.[39] The  
20 above mentioned meta-analysis[15] identified only 2 cohort studies including  
21 over 100,000 individuals assessing colorectal cancer risk among aspirin-  
22 users.[40 41] Even our exposed groups for aspirin and non-selective NSAIDs  
23 alone were 5-7 times larger than earlier large studies. The decrease in  
24 gastrointestinal cancer risk became evident only after longer exposure, which  
25 has also been shown in previous research,[15 42] and is biologically plausible  
26 given the expected time latency for (hindering) cancer progression.  
27  
28  
29  
30  
31  
32  
33  
34  
35  
36  
37  
38

39 The higher risk among aspirin and other NSAID users also using PPIs should  
40 be interpreted with some caution. PPIs are often prescribed for  
41 gastroesophageal reflux and peptic ulcers, which are risk factors for  
42 oesophageal and gastric cancer, respectively. Therefore, a higher cancer risk  
43 was expected for those locations, yet not for the other gastrointestinal cancer  
44 types. PPIs can also be used to prevent peptic ulcers in users of aspirin and  
45 other NSAIDs, usually in individuals without any gastro-intestinal morbidity.  
46  
47  
48  
49  
50  
51  
52  
53

54 Two other studies of our group based on the same source cohort,[23 25]  
55  
56  
57  
58  
59  
60

1  
2  
3 investigated the risk of gastric and oesophageal cancer among PPI  
4 maintenance users, which suggested an increased risk in all indication groups  
5 for PPI (including those without gastrointestinal symptoms, and aspirin/NSAID  
6 users); which also supports a potential independent role for PPI in  
7 carcinogenesis as also suggested recently by other groups.[43 44] Together  
8 with a potential increased risk of mortality related to long-term PPI use,[45] we  
9 believe a more careful approach should be considered when prescribing PPIs  
10 to prevent gastrointestinal complications in long-term NSAIDs users. Yet, the  
11 risk for gastrointestinal complications such as bleeding should be assessed  
12 on an individual bases based on other research investigating shorter-term  
13 effects.[46] Before considering implementing aspirin or other NSAIDs as wide-  
14 spread intervention, safety, in particular considering long-term use, needs to  
15 be considered, with previous research tending towards a “favourable benefit  
16 harm-profile” despite an excess risk of bleeding.[47]  
17  
18  
19  
20  
21  
22  
23  
24  
25  
26  
27  
28  
29  
30  
31  
32  
33  
34

35 To conclude, this large Swedish nationwide and population-based cohort  
36 study on contemporary and long-term use of NSAIDs indicates a strongly  
37 protective effect of long-term use of both (low-dose) aspirin and other non-  
38 selective NSAIDs on gastrointestinal cancer development.  
39  
40  
41  
42  
43  
44  
45

46 **Acknowledgements:** We are grateful to all thousands of patients, physicians  
47 and healthcare staff members who contributed to the data collection, and to  
48 the Swedish National Board of Health and Welfare that collected the data.  
49  
50  
51  
52  
53  
54  
55  
56  
57  
58  
59  
60

1  
2  
3 **Authors' contributions:** NB is the submission guarantor. NB and JL had full  
4 access to all the data in the study and take responsibility for the integrity of  
5 the data and the accuracy of the data analysis. NB conducted and is  
6 responsible for the data-analysis. Literature search: NB; Design of the study:  
7 both authors; Data collection and preparation for analyses: NB; Data analysis:  
8 NB; Data interpretation: both authors; Writing of first draft: NB, revised and  
9 approved by both authors.  
10  
11  
12  
13  
14  
15  
16  
17  
18  
19

20 **Funding:** This work was supported by SFO epidemiology (Karolinska  
21 Institutet, junior investigator award NB), Swedish Research Council (839-  
22 2008-7496), Swedish Cancer Society (CAN 2015/460). These funding  
23 sources had no role in the design and conduct of the study; collection,  
24 management, analysis, and interpretation of the data; and preparation,  
25 review, or approval of the manuscript.  
26  
27  
28  
29  
30  
31  
32  
33

34 **Competing interests:** none  
35  
36  
37

38 **Data sharing statement:** We are willing to share data upon request after  
39 ethics approval has been approved by the relevant committee and the  
40 governmental agencies that maintain the data.  
41  
42  
43  
44  
45  
46  
47  
48  
49  
50  
51  
52  
53  
54  
55  
56  
57  
58  
59  
60

## References

1. Balkwill F, Mantovani A. Inflammation and cancer: back to Virchow? *Lancet* 2001;**357**(9255):539-45 doi: 10.1016/s0140-6736(00)04046-0[published Online First: Epub Date]].
2. Simon LS, Yocum D. New and future drug therapies for rheumatoid arthritis. *Rheumatology (Oxford)* 2000;**39 Suppl 1**:36-42
3. Yang M, Wang HT, Zhao M, et al. Network Meta-Analysis Comparing Relatively Selective COX-2 Inhibitors Versus Coxibs for the Prevention of NSAID-Induced Gastrointestinal Injury. *Medicine* 2015;**94**(40):e1592 doi: 10.1097/MD.0000000000001592[published Online First: Epub Date]].
4. Sjodahl R. Nonsteroidal anti-inflammatory drugs and the gastrointestinal tract. Extent, mode, and dose dependence of anticancer effects. *Am J Med* 2001;**110**(1a):66s-69s
5. Huntjens DR, Danhof M, Della Pasqua OE. Pharmacokinetic-pharmacodynamic correlations and biomarkers in the development of COX-2 inhibitors. *Rheumatology (Oxford)* 2005;**44**(7):846-59 doi: 10.1093/rheumatology/keh627[published Online First: Epub Date]].
6. Bjarnason I, Thjodleifsson B. Gastrointestinal toxicity of non-steroidal anti-inflammatory drugs: the effect of nimesulide compared with naproxen on the human gastrointestinal tract. *Rheumatology (Oxford)* 1999;**38 Suppl 1**:24-32
7. Nissen SE, Yeomans ND, Solomon DH, et al. Cardiovascular Safety of Celecoxib, Naproxen, or Ibuprofen for Arthritis. *N Engl J Med* 2016;**375**(26):2519-29 doi: 10.1056/NEJMoa1611593[published Online First: Epub Date]].
8. Bakhriansyah M, Souverein PC, de Boer A, et al. Gastrointestinal toxicity among patients taking selective COX-2 inhibitors or conventional NSAIDs, alone or combined with proton pump inhibitors: a case-control study. *Pharmacoepidemiol Drug Saf* 2017 doi: 10.1002/pds.4183[published Online First: Epub Date]].

- 1  
2  
3 9. Capurso G, Schunemann HJ, Terrenato I, et al. Meta-analysis: the use of  
4 non-steroidal anti-inflammatory drugs and pancreatic cancer risk for  
5 different exposure categories. *Aliment Pharmacol Ther*  
6 2007;**26**(8):1089-99 doi: 10.1111/j.1365-2036.2007.03495.x[published  
7 Online First: Epub Date]].  
8  
9
- 10  
11 10. Tian W, Zhao Y, Liu S, et al. Meta-analysis on the relationship between  
12 nonsteroidal anti-inflammatory drug use and gastric cancer. *Eur J*  
13 *Cancer Prev* 2010;**19**(4):288-98 doi:  
14 10.1097/CEJ.0b013e328339648c[published Online First: Epub Date]].  
15
- 16  
17 11. Yang P, Zhou Y, Chen B, et al. Aspirin use and the risk of gastric cancer:  
18 a meta-analysis. *Dig Dis Sci* 2010;**55**(6):1533-9 doi: 10.1007/s10620-  
19 009-0915-0[published Online First: Epub Date]].  
20
- 21  
22 12. Ye X, Fu J, Yang Y, et al. Dose-risk and duration-risk relationships  
23 between aspirin and colorectal cancer: a meta-analysis of published  
24 cohort studies. *PLoS One* 2013;**8**(2):e57578 doi:  
25 10.1371/journal.pone.0057578[published Online First: Epub Date]].  
26
- 27  
28 13. Ye X, Fu J, Yang Y, et al. Frequency-risk and duration-risk relationships  
29 between aspirin use and gastric cancer: a systematic review and meta-  
30 analysis. *PLoS One* 2013;**8**(7):e71522 doi:  
31 10.1371/journal.pone.0071522[published Online First: Epub Date]].  
32
- 33  
34 14. Cui XJ, He Q, Zhang JM, et al. High-dose aspirin consumption contributes  
35 to decreased risk for pancreatic cancer in a systematic review and  
36 meta-analysis. *Pancreas* 2014;**43**(1):135-40 doi:  
37 10.1097/MPA.0b013e3182a8d41f[published Online First: Epub Date]].  
38
- 39  
40 15. Algra AM, Rothwell PM. Effects of regular aspirin on long-term cancer  
41 incidence and metastasis: a systematic comparison of evidence from  
42 observational studies versus randomised trials. *Lancet Oncol*  
43 2012;**13**(5):518-27 doi: 10.1016/S1470-2045(12)70112-2[published  
44 Online First: Epub Date]].  
45
- 46  
47 16. Sutcliffe P, Connock M, Gurung T, et al. Aspirin for prophylactic use in the  
48 primary prevention of cardiovascular disease and cancer: a systematic  
49 review and overview of reviews. *Health Technol Assess* 2013;**17**(43):1-  
50 253 doi: 10.3310/hta17430[published Online First: Epub Date]].  
51  
52  
53  
54  
55  
56  
57  
58  
59  
60

- 1  
2  
3 17. Cheung KS, Chan EW, Wong AYS, et al. Aspirin and Risk of Gastric  
4 Cancer After Helicobacter pylori Eradication: A Territory-Wide Study.  
5 LID - 10.1093/jnci/djx267 [doi]. (1460-2105 (Electronic))  
6  
7
- 8 18. Niikura R, Hayakawa Y, Hirata Y, et al. Distinct chemopreventive effects  
9 of aspirin in diffuse and intestinal-type gastric cancer. LID -  
10 canprevres.0276.2017 [pii] LID - 10.1158/1940-6207.CAPR-17-0276  
11 [doi]. (1940-6215 (Electronic))  
12  
13
- 14 19. Imhann F, Bonder MJ, Vich Vila A, et al. Proton pump inhibitors affect the  
15 gut microbiome. Gut 2016;**65**(5):740-8 doi: 10.1136/gutjnl-2015-  
16 310376[published Online First: Epub Date]].  
17  
18
- 19 20. Alsalahi O, Dobrian AD. Proton Pump Inhibitors: The Culprit for Barrett's  
20 Esophagus? Front Oncol 2014;**4**:373 doi:  
21 10.3389/fonc.2014.00373[published Online First: Epub Date]].  
22  
23
- 24 21. Kia L, Kahrilas PJ. Therapy: Risks associated with chronic PPI use -  
25 signal or noise? Nat Rev Gastroenterol Hepatol 2016 doi:  
26 10.1038/nrgastro.2016.44[published Online First: Epub Date]].  
27  
28
- 29 22. Poulsen AH, Christensen S, McLaughlin JK, et al. Proton pump inhibitors  
30 and risk of gastric cancer: a population-based cohort study. Br J  
31 Cancer 2009;**100**(9):1503-7 doi: 10.1038/sj.bjc.6605024[published  
32 Online First: Epub Date]].  
33  
34
- 35 23. Brusselaers N, Engstrand L, Lagergren J. Maintenance proton pump  
36 inhibition therapy and risk of oesophageal cancer. Cancer  
37 epidemiology 2018;**53**:172-77 doi:  
38 10.1016/j.canep.2018.02.004[published Online First: Epub Date]].  
39  
40
- 41 24. Brusselaers N, Engstrand L, Lagergren J. PPI use and oesophageal  
42 cancer: What if the results are true? Cancer epidemiology 2018 doi:  
43 10.1016/j.canep.2018.04.004[published Online First: Epub Date]].  
44  
45
- 46 25. Brusselaers N, Wahlin K, Engstrand L, et al. Maintenance therapy with  
47 proton pump inhibitors and risk of gastric cancer: a nationwide  
48 population-based cohort study in Sweden. BMJ Open  
49 2017;**7**(10):e017739 doi: 10.1136/bmjopen-2017-017739[published  
50 Online First: Epub Date]].  
51  
52
- 53 26. Ma Y, Brusselaers N. Maintenance use of aspirin or other non-steroidal  
54 anti-inflammatory drugs (NSAIDs) and prostate cancer risk. Prostate  
55  
56  
57  
58  
59

- 1  
2  
3 Cancer Prostatic Dis 2017 doi: 10.1038/s41391-017-0021-x[published  
4 Online First: Epub Date]].  
5  
6 27. Statistics Sweden - Statistical Database Population Statistics (accessed  
7 06 April 2016) <http://www.statistikdatabasen.scb.se/>. Secondary  
8 Statistics Sweden - Statistical Database Population Statistics  
9 (accessed 06 April 2016) <http://www.statistikdatabasen.scb.se/>.  
10 <http://www.statistikdatabasen.scb.se/>.  
11  
12  
13  
14 28. Simin J, Tamimi R, Lagergren J, et al. Menopausal hormone therapy and  
15 cancer risk: An overestimated risk? Eur J Cancer 2017;**84**:60-68 doi:  
16 10.1016/j.ejca.2017.07.012[published Online First: Epub Date]].  
17  
18 29. Brusselaers N, Maret-Ouda J, Konings P, et al. Menopausal hormone  
19 therapy and the risk of esophageal and gastric cancer. Int J Cancer  
20 2016 doi: 10.1002/ijc.30588[published Online First: Epub Date]].  
21  
22 30. Sadr-Azodi O, Konings P, Brusselaers N. Menopausal hormone therapy  
23 and pancreatic cancer risk in women: a population-based matched  
24 cohort study. United European Gastroenterol J 2017;**5**(8):1123-28 doi:  
25 10.1177/2050640617702060[published Online First: Epub Date]].  
26  
27 31. Barlow L, Westergren K, Holmberg L, et al. The completeness of the  
28 Swedish Cancer Register: a sample survey for year 1998. Acta Oncol  
29 2009;**48**(1):27-33 doi: 902131375 [pii]  
30 10.1080/02841860802247664[published Online First: Epub Date]].  
31  
32 32. FASS (Farmaceutiska specialiteter i Sverige/ Pharmaceutical specialities in  
33 Sweden), 2015.  
34  
35 33. Läkemedelsverket (Medical Products Agency): Over-the-counter (OTC).  
36 Secondary Läkemedelsverket (Medical Products Agency): Over-the-  
37 counter (OTC) 2016.  
38 <https://lakemedelsverket.se/english/product/Medicinal-products/OTC/>.  
39  
40 34. Breslow N, Day N. *Statistical Methods in Cancer Research: The design  
41 and analysis of cohort studies*. Lyon, 1987.  
42  
43 35. Rothwell PM, Wilson M, Elwin CE, et al. Long-term effect of aspirin on  
44 colorectal cancer incidence and mortality: 20-year follow-up of five  
45 randomised trials. Lancet 2010;**376**(9754):1741-50 doi:  
46 10.1016/S0140-6736(10)61543-7[published Online First: Epub Date]].  
47  
48  
49  
50  
51  
52  
53  
54  
55  
56  
57  
58  
59  
60

- 1  
2  
3 36. Kyriazi V, Theodoulou E. Assessing the risk and prognosis of thrombotic  
4 complications in cancer patients. *Arch Pathol Lab Med*  
5 2013;**137**(9):1286-95 doi: 10.5858/arpa.2012-0490-RA[published  
6 Online First: Epub Date]].  
7  
8  
9 37. Mercadante S. The use of anti-inflammatory drugs in cancer pain. *Cancer*  
10 *Treat Rev* 2001;**27**(1):51-61 doi: 10.1053/ctrv.2000.0192[published  
11 Online First: Epub Date]].  
12  
13  
14 38. Din FV, Theodoratou E, Farrington SM, et al. Effect of aspirin and NSAIDs  
15 on risk and survival from colorectal cancer. *Gut* 2010;**59**(12):1670-9  
16 doi: 10.1136/gut.2009.203000[published Online First: Epub Date]].  
17  
18  
19 39. Bosetti C, Rosato V, Gallus S, et al. Aspirin and cancer risk: a quantitative  
20 review to 2011. *Ann Oncol* 2012;**23**(6):1403-15 doi:  
21 10.1093/annonc/mds113[published Online First: Epub Date]].  
22  
23  
24 40. Jacobs EJ, Thun MJ, Bain EB, et al. A large cohort study of long-term  
25 daily use of adult-strength aspirin and cancer incidence. *J Natl Cancer*  
26 *Inst* 2007;**99**(8):608-15 doi: 10.1093/jnci/djk132[published Online First:  
27 Epub Date]].  
28  
29  
30 41. Smalley W, Ray WA, Daugherty J, et al. Use of nonsteroidal anti-  
31 inflammatory drugs and incidence of colorectal cancer: a population-  
32 based study. *Arch Intern Med* 1999;**159**(2):161-6  
33  
34  
35 42. Cao Y, Nishihara R, Wu K, et al. Population-wide Impact of Long-term  
36 Use of Aspirin and the Risk for Cancer. *JAMA Oncol* 2016;**2**(6):762-9  
37 doi: 10.1001/jamaoncol.2015.6396[published Online First: Epub Date]].  
38  
39  
40 43. Cheung KS, Chan EW, Wong AYS, et al. Long-term proton pump  
41 inhibitors and risk of gastric cancer development after treatment for  
42 *Helicobacter pylori*: a population-based study. *Gut* 2018;**67**(1):28-35  
43 doi: 10.1136/gutjnl-2017-314605[published Online First: Epub Date]].  
44  
45  
46 44. Niikura R, Hayakawa Y, Hirata Y, et al. Long-term proton pump inhibitor  
47 use is a risk factor of gastric cancer after treatment for *Helicobacter*  
48 *pylori*: a retrospective cohort analysis. *Gut* 2017 doi: 10.1136/gutjnl-  
49 2017-315710[published Online First: Epub Date]].  
50  
51  
52 45. Xie Y, Bowe B, Li T, et al. Risk of death among users of Proton Pump  
53 Inhibitors: a longitudinal observational cohort study of United States  
54  
55  
56  
57  
58  
59  
60



1  
2  
3 veterans. BMJ Open 2017;7(6):e015735 doi: 10.1136/bmjopen-2016-  
4 015735[published Online First: Epub Date]].  
5

- 6 46. Li L, Geraghty OC, Mehta Z, et al. Age-specific risks, severity, time  
7 course, and outcome of bleeding on long-term antiplatelet treatment  
8 after vascular events: a population-based cohort study. Lancet  
9 2017;**390**(10093):490-99 doi: 10.1016/s0140-6736(17)30770-  
10 5[published Online First: Epub Date]].  
11  
12 47. Cuzick J, Thorat MA, Bosetti C, et al. Estimates of benefits and harms of  
13 prophylactic use of aspirin in the general population. Ann Oncol  
14 2015;**26**(1):47-57 doi: 10.1093/annonc/mdu225[published Online First:  
15 Epub Date]].  
16  
17  
18  
19  
20  
21  
22  
23  
24  
25  
26  
27  
28  
29  
30  
31  
32  
33  
34  
35  
36  
37  
38  
39  
40  
41  
42  
43  
44  
45  
46  
47  
48  
49  
50  
51  
52  
53  
54  
55  
56  
57  
58  
59  
60

**Table 1: Characteristics of the study cohort on therapy with aspirin, selective cyclo-oxygenase-2 (COX-2) inhibitors, and non-selective non-steroidal anti-inflammatory drug (NSAIDs).**

|                                        | <b>Aspirin only</b> | <b>Non-selective non-aspirin NSAIDs</b> | <b>Selective COX-2 inhibitors</b> |
|----------------------------------------|---------------------|-----------------------------------------|-----------------------------------|
|                                        | <i>Number (%)</i>   | <i>Number (%)</i>                       | <i>Number (%)</i>                 |
| Total                                  | 783,870             | 566,209                                 | 17,948                            |
| Sex                                    |                     |                                         |                                   |
| <i>Men</i>                             | 421,609 (53.8)      | 210,705 (37.2)                          | 7,201 (40.1)                      |
| <i>Women</i>                           | 362,261 (46.2)      | 355,504 (62.8)                          | 10,747 (59.9)                     |
| Age at first prescription              |                     |                                         |                                   |
| <40 years                              | 12,189 (1.6)        | 110,592 (19.5)                          | 2,720 (15.2)                      |
| 40-49 years                            | 32,743 (4.2)        | 125,977 (22.3)                          | 3,849 (21.5)                      |
| 50-59 years                            | 108,683 (13.9)      | 146,981 (26.0)                          | 4,941 (27.5)                      |
| 60-69 years                            | 200,154 (25.5)      | 112,682 (19.9)                          | 3,914 (21.8)                      |
| ≥70 years                              | 430,101 (54.9)      | 69,977 (12.4)                           | 2,524 (14.1)                      |
| Calendar period at first prescription  |                     |                                         |                                   |
| 2005-2006                              | 557,023 (71.1)      | 387,443 (68.4)                          | 10,393 (57.9)                     |
| 2007-2009                              | 156,790 (20.0)      | 145,208 (25.7)                          | 5,500 (30.6)                      |
| 2010-2012                              | 70,057 (8.9)        | 33,558 (5.9)                            | 2,055 (11.5)                      |
| Proton pump inhibitors use (≥180 days) |                     |                                         |                                   |
| <i>yes</i>                             | 200,828 (25.6)      | 148,586 (26.2)                          | 5,602 (31.2)                      |
| <i>no</i>                              | 583,042 (74.4)      | 417,623 (73.8)                          | 12,346 (68.8)                     |
| Statins use (≥180 days)                |                     |                                         |                                   |
| <i>yes</i>                             | 432,996 (55.2)      | 77,514 (13.7)                           | 2,589 (14.4)                      |
| <i>no</i>                              | 350,874 (44.8)      | 488,695 (86.3)                          | 15,359 (85.6)                     |
| Gastrointestinal cancer                | 10,969 (1.40)       | 3,428 (0.61)                            | 100 (0.56)                        |
| Oesophageal cancer                     | 539 (0.07)          | 134 (0.02)                              | 7 (0.04)                          |
| <i>Adenocarcinoma</i>                  | 319 (0.04)          | 75 (0.01)                               | 4 (0.02)                          |
| <i>Squamous cell carcinoma</i>         | 203 (0.03)          | 50 (0.01)                               | 2 (0.01)                          |
| Gastric cancer                         | 1,079 (0.14)        | 260 (0.05)                              | 7 (0.04)                          |
| <i>Adenocarcinoma</i>                  | 949 (0.12)          | 212 (0.04)                              | 3 (0.02)                          |
| Small bowel cancer                     | 253 (0.03)          | 94 (0.02)                               | 5 (0.03)                          |
| <i>Carcinoid</i>                       | 122 (0.02)          | 43 (0.01)                               | 2 (0.01)                          |
| Colorectal cancer                      | 6,919 (0.88)        | 2,017 (0.36)                            | 60 (0.33)                         |
| <i>Adenocarcinoma</i>                  | 6,608 (0.84)        | 1,887 (0.33)                            | 59 (0.33)                         |
| Liver cancer                           | 645 (0.08)          | 232 (0.04)                              | 3 (0.02)                          |
| <i>Hepatocellular carcinoma</i>        | 358 (0.05)          | 100 (0.02)                              | 1 (0.01)                          |
| <i>Cholangiocellular carcinoma</i>     | 81 (0.01)           | 41 (0.01)                               | 0 (0.00)                          |
| Gallbladder and biliary tract cancer   | 385 (0.05)          | 190 (0.03)                              | 5 (0.03)                          |
| <i>Adenocarcinoma</i>                  | 288 (0.04)          | 149 (0.03)                              | 2 (0.01)                          |
| Pancreatic cancer                      | 1,114 (0.14)        | 490 (0.09)                              | 13 (0.07)                         |
| <i>Adenocarcinoma</i>                  | 835 (0.11)          | 402 (0.07)                              | 11 (0.06)                         |

|    |                                       |             |             |             |
|----|---------------------------------------|-------------|-------------|-------------|
| 1  |                                       |             |             |             |
| 2  |                                       |             |             |             |
| 3  | Other gastrointestinal cancer         | 35 (0.00)   | 11 (0.00)   | 0 (0.00)    |
| 4  | Duration of follow-up in person-years |             |             |             |
| 5  | <i>Total</i>                          | 3,776,237   | 3,376,275   | 82,733      |
| 6  | <i>Mean (standard deviation)</i>      | 4.82 (2.40) | 5.96 (1.67) | 4.61 (2.21) |
| 7  |                                       |             |             |             |
| 8  |                                       |             |             |             |
| 9  |                                       |             |             |             |
| 10 |                                       |             |             |             |
| 11 |                                       |             |             |             |
| 12 |                                       |             |             |             |
| 13 |                                       |             |             |             |
| 14 |                                       |             |             |             |
| 15 |                                       |             |             |             |
| 16 |                                       |             |             |             |
| 17 |                                       |             |             |             |
| 18 |                                       |             |             |             |
| 19 |                                       |             |             |             |
| 20 |                                       |             |             |             |
| 21 |                                       |             |             |             |
| 22 |                                       |             |             |             |
| 23 |                                       |             |             |             |
| 24 |                                       |             |             |             |
| 25 |                                       |             |             |             |
| 26 |                                       |             |             |             |
| 27 |                                       |             |             |             |
| 28 |                                       |             |             |             |
| 29 |                                       |             |             |             |
| 30 |                                       |             |             |             |
| 31 |                                       |             |             |             |
| 32 |                                       |             |             |             |
| 33 |                                       |             |             |             |
| 34 |                                       |             |             |             |
| 35 |                                       |             |             |             |
| 36 |                                       |             |             |             |
| 37 |                                       |             |             |             |
| 38 |                                       |             |             |             |
| 39 |                                       |             |             |             |
| 40 |                                       |             |             |             |
| 41 |                                       |             |             |             |
| 42 |                                       |             |             |             |
| 43 |                                       |             |             |             |
| 44 |                                       |             |             |             |
| 45 |                                       |             |             |             |
| 46 |                                       |             |             |             |
| 47 |                                       |             |             |             |
| 48 |                                       |             |             |             |
| 49 |                                       |             |             |             |
| 50 |                                       |             |             |             |
| 51 |                                       |             |             |             |
| 52 |                                       |             |             |             |
| 53 |                                       |             |             |             |
| 54 |                                       |             |             |             |
| 55 |                                       |             |             |             |
| 56 |                                       |             |             |             |
| 57 |                                       |             |             |             |
| 58 |                                       |             |             |             |
| 59 |                                       |             |             |             |
| 60 |                                       |             |             |             |

For peer review only

**Table 2: The risk of different types of gastrointestinal cancer (and the major histological subtype) among users of aspirin and non-aspirin non-steroidal anti-inflammatory drugs (NSAIDs), expressed as standardized incidence ratios (SIRs) and 95% confidence intervals (CIs) and stratified by age and sex.**

|                                | Aspirin users (n=783,870) |                         | Non-selective non-aspirin NSAIDs users (n=566,209) |                         |
|--------------------------------|---------------------------|-------------------------|----------------------------------------------------|-------------------------|
|                                | Number of cases           | SIRS (95% CI)           | Number of cases                                    | SIRS (95% CI)           |
| <b>Gastrointestinal cancer</b> | <b>10,969</b>             | <b>1.02 (1.00-1.04)</b> | <b>3,428</b>                                       | <b>0.79 (0.77-0.82)</b> |
| <i>Men</i>                     | 6,659                     | 1.24 (1.21-1.27)        | 1,390                                              | 0.78 (0.74-0.82)        |
| <i>Women</i>                   | 4,310                     | 0.99 (0.96-1.02)        | 2,038                                              | 0.81 (0.77-0.84)        |
| 18-39 years                    | 3                         | -                       | 14                                                 | 0.59 (0.32-0.99)        |
| 40-49 years                    | 20                        | 0.70 (0.43-1.08)        | 116                                                | 0.67 (0.55-0.81)        |
| 50-59 years                    | 408                       | 1.13 (1.03-1.25)        | 423                                                | 0.61 (0.55-0.67)        |
| 60-69 years                    | 2,286                     | 1.13 (1.08-1.18)        | 1,074                                              | 0.71 (0.67-0.75)        |
| ≥70 years                      | 8,252                     | 0.99 (0.97-1.01)        | 1,801                                              | 0.94 (0.90-0.98)        |
| <b>Oesophageal cancer</b>      | <b>539</b>                | <b>1.10 (1.01-1.19)</b> | <b>134</b>                                         | <b>0.75 (0.63-0.89)</b> |
| <i>Adenocarcinoma</i>          | 319                       | 1.17 (1.04-1.30)        | 75                                                 | 0.81 (0.64-1.01)        |
| <i>Squamous cell carcinoma</i> | 203                       | 1.06 (0.92-1.22)        | 50                                                 | 0.66 (0.49-0.87)        |
| <i>Men</i>                     | 415                       | 1.09 (0.99-1.20)        | 90                                                 | 0.88 (0.63-0.97)        |
| <i>Women</i>                   | 124                       | 1.12 (0.93-1.33)        | 44                                                 | 0.68 (0.49-0.91)        |
| 18-39 years                    | 0                         | -                       | 0                                                  | -                       |
| 40-49 years                    | 1                         | -                       | 5                                                  | 0.87 (0.28-2.03)        |
| 50-59 years                    | 21                        | 0.99 (0.61-1.51)        | 18                                                 | 0.58 (0.34-0.92)        |
| 60-69 years                    | 164                       | 1.35 (1.15-1.57)        | 47                                                 | 0.65 (0.48-0.86)        |
| ≥70 years                      | 353                       | 1.02 (0.92-1.13)        | 64                                                 | 0.92 (0.71-1.18)        |
| <b>Gastric cancer</b>          | <b>1,079</b>              | <b>1.08 (1.01-1.14)</b> | <b>260</b>                                         | <b>0.70 (0.62-0.80)</b> |
| <i>Adenocarcinoma</i>          | 949                       | 1.07 (1.00-1.14)        | 212                                                | 0.66 (0.58-0.76)        |
| <i>Men</i>                     | 714                       | 1.08 (1.00-1.16)        | 128                                                | 0.72 (0.60-0.85)        |
| <i>Women</i>                   | 365                       | 1.08 (0.97-1.19)        | 132                                                | 0.69 (0.58-0.82)        |
| 18-39 years                    | 0                         | -                       | 1                                                  | -                       |
| 40-49 years                    | 3                         | -                       | 13                                                 | 0.71 (0.38-1.22)        |
| 50-59 years                    | 51                        | 1.48 (1.10-1.94)        | 37                                                 | 0.61 (0.43-0.85)        |
| 60-69 years                    | 208                       | 1.20 (1.04-1.37)        | 73                                                 | 0.61 (0.48-0.77)        |
| ≥70 years                      | 817                       | 1.03 (0.96-1.11)        | 136                                                | 0.81 (0.68-0.95)        |
| <b>Small bowel cancer</b>      | <b>253</b>                | <b>1.05 (0.93-1.19)</b> | <b>94</b>                                          | <b>0.84 (0.68-1.02)</b> |
| <i>Carcinoid</i>               | 122                       | 1.11 (0.92-1.32)        | 43                                                 | 0.84 (0.61-1.13)        |
| <i>Men</i>                     | 150                       | 1.05 (0.89-1.23)        | 34                                                 | 0.72 (0.50-1.00)        |
| <i>Women</i>                   | 103                       | 1.06 (0.86-1.28)        | 60                                                 | 0.93 (0.71-1.19)        |
| 18-39 years                    | 0                         | -                       | 1                                                  | -                       |
| 40-49 years                    | 1                         | -                       | 3                                                  | -                       |

|    |                                             |                                    |              |                         |              |                         |
|----|---------------------------------------------|------------------------------------|--------------|-------------------------|--------------|-------------------------|
| 1  |                                             |                                    |              |                         |              |                         |
| 2  |                                             | 50-59 years                        | 18           | 1.53 (0.91-2.41)        | 18           | 0.77 (0.46-1.22)        |
| 3  |                                             | 60-69 years                        | 64           | 1.16 (0.89-1.48)        | 33           | 0.81 (0.56-1.14)        |
| 4  |                                             | ≥70 years                          | 170          | 0.99 (0.85-1.15)        | 39           | 0.98 (0.69-1.34)        |
| 5  |                                             |                                    |              |                         |              |                         |
| 6  | <b>Colorectal cancer</b>                    |                                    | <b>6,919</b> | <b>1.00 (0.98-1.03)</b> | <b>2,017</b> | <b>0.74 (0.71-0.77)</b> |
| 7  |                                             | <i>Adenocarcinoma</i>              | 6,608        | 1.00 (0.80-1.03)        | 1,887        | 0.74 (0.70-0.77)        |
| 8  |                                             | Men                                | 4,105        | 1.03 (1.00-1.06)        | 793          | 0.73 (0.68-0.79)        |
| 9  |                                             | Women                              | 2,814        | 0.97 (0.93-1.00)        | 1,224        | 0.74 (0.70-0.78)        |
| 10 |                                             | 18-39 years                        | 2            | -                       | 10           | 0.61 (0.29-1.13)        |
| 11 |                                             | 40-49 years                        | 9            | 0.52 (0.24-0.98)        | 51           | 0.47 (0.35-0.62)        |
| 12 |                                             | 50-59 years                        | 241          | 1.16 (1.02-1.31)        | 232          | 0.55 (0.48-0.63)        |
| 13 |                                             | 60-69 years                        | 1,268        | 1.05 (0.99-1.11)        | 600          | 0.66 (0.60-0.71)        |
| 14 |                                             | ≥70 years                          | 5,399        | 0.99 (0.96-1.02)        | 1,124        | 0.88 (0.83-0.94)        |
| 15 |                                             |                                    |              |                         |              |                         |
| 16 | <b>Liver cancer</b>                         |                                    | <b>645</b>   | <b>1.11 (1.03-1.20)</b> | <b>232</b>   | <b>0.96 (0.84-1.09)</b> |
| 17 |                                             | <i>Hepatocellular carcinoma</i>    | 358          | 1.13 (1.02-1.25)        | 100          | 0.83 (0.77-1.01)        |
| 18 |                                             | <i>Cholangiocellular carcinoma</i> | 81           | 1.14 (0.91-1.42)        | 41           | 1.10 (0.79-1.49)        |
| 19 |                                             | Men                                | 449          | 1.12 (1.02-1.23)        | 130          | 1.00 (0.84-1.19)        |
| 20 |                                             | Women                              | 196          | 1.09 (0.94-1.26)        | 102          | 0.91 (0.74-1.10)        |
| 21 |                                             | 18-39 years                        | 0            | -                       | 3            | -                       |
| 22 |                                             | 40-49 years                        | 4            | -                       | 10           | 0.95 (0.46-1.75)        |
| 23 |                                             | 50-59 years                        | 32           | 1.04 (0.71-1.47)        | 44           | 0.90 (0.65-1.21)        |
| 24 |                                             | 60-69 years                        | 182          | 1.36 (1.17-1.57)        | 90           | 0.99 (0.79-1.21)        |
| 25 |                                             | ≥70 years                          | 427          | 1.03 (0.94-1.14)        | 85           | 0.95 (0.76-1.17)        |
| 26 |                                             |                                    |              |                         |              |                         |
| 27 | <b>Gallbladder and biliary tract cancer</b> |                                    | <b>385</b>   | <b>0.92 (0.83-1.01)</b> | <b>190</b>   | <b>1.03 (0.89-1.19)</b> |
| 28 |                                             | <i>Adenocarcinoma</i>              | 288          | 0.93 (0.82-1.04)        | 149          | 1.07 (0.90-1.25)        |
| 29 |                                             | Men                                | 181          | 1.00 (0.86-1.15)        | 50           | 0.98 (0.73-1.29)        |
| 30 |                                             | Women                              | 204          | 0.85 (0.74-0.80)        | 140          | 1.05 (0.88-1.24)        |
| 31 |                                             | 18-39 years                        | 0            | -                       | 1            | -                       |
| 32 |                                             | 40-49 years                        | 0            | -                       | 7            | 0.97 (0.39-2.00)        |
| 33 |                                             | 50-59 years                        | 6            | 0.52 (.19-1.13)         | 12           | 0.46 (0.24-0.80)        |
| 34 |                                             | 60-69 years                        | 91           | 1.31 (1.05-1.60)        | 63           | 1.00 (0.77-1.28)        |
| 35 |                                             | ≥70 years                          | 288          | 0.85 (0.76-0.96)        | 107          | 1.23 (1.00-1.48)        |
| 36 |                                             |                                    |              |                         |              |                         |
| 37 | <b>Pancreatic cancer</b>                    |                                    | <b>1,114</b> | <b>1.04 (0.98-1.11)</b> | <b>490</b>   | <b>1.00 (0.92-1.10)</b> |
| 38 |                                             | <i>Adenocarcinoma</i>              | 835          | 1.00 (0.93-1.07)        | 402          | 1.02 (0.92-1.13)        |
| 39 |                                             | Men                                | 629          | 1.07 (0.99-1.16)        | 163          | 0.89 (0.76-1.03)        |
| 40 |                                             | Women                              | 485          | 1.01 (0.92-1.11)        | 327          | 1.08 (0.96-1.20)        |
| 41 |                                             | 18-39 years                        | 1            | -                       | 1            | -                       |
| 42 |                                             | 40-49 years                        | 3            | -                       | 26           | 1.65 (1.08-2.42)        |
| 43 |                                             | 50-59 years                        | 37           | 0.91 (0.64-1.25)        | 68           | 0.86 (0.67-1.09)        |
| 44 |                                             | 60-69 years                        | 307          | 1.19 (1.06-1.33)        | 174          | 0.85 (0.73-0.99)        |
| 45 |                                             | ≥70 years                          | 766          | 1.00 (0.93-1.07)        | 221          | 1.18 (1.03-1.35)        |
| 46 |                                             |                                    |              |                         |              |                         |
| 47 |                                             |                                    |              |                         |              |                         |
| 48 |                                             |                                    |              |                         |              |                         |
| 49 |                                             |                                    |              |                         |              |                         |
| 50 |                                             |                                    |              |                         |              |                         |
| 51 |                                             |                                    |              |                         |              |                         |
| 52 |                                             |                                    |              |                         |              |                         |
| 53 |                                             |                                    |              |                         |              |                         |
| 54 |                                             |                                    |              |                         |              |                         |
| 55 |                                             |                                    |              |                         |              |                         |
| 56 |                                             |                                    |              |                         |              |                         |
| 57 |                                             |                                    |              |                         |              |                         |
| 58 |                                             |                                    |              |                         |              |                         |
| 59 |                                             |                                    |              |                         |              |                         |
| 60 |                                             |                                    |              |                         |              |                         |

**Table 3: The risk of gastrointestinal cancer among aspirin and non-aspirin non-steroidal anti-inflammatory drug (NSAID) users, by estimated duration of use, expressed as standardized incidence ratios (SIRs) and 95% confidence intervals (CIs).**

|                                | Aspirin only (n=783,870) |                 |                  | Non-selective non-aspirin NSAIDs (n=566,209) |                 |                  |
|--------------------------------|--------------------------|-----------------|------------------|----------------------------------------------|-----------------|------------------|
|                                | Categories (quartiles)   | Number of cases | SIRs (95% CI)    | Categories (quartiles)                       | Number of cases | SIRs (95% CI)    |
| <b>Gastrointestinal cancer</b> |                          |                 |                  |                                              |                 |                  |
|                                | 0.5-2.5 years            | 4,158           | 2.77 (2.69-2.85) | 0.5-0.7 years                                | 865             | 1.00 (0.93-1.06) |
|                                | 2.5-5.5 years            | 4,532           | 1.83 (1.77-1.88) | 0.7-1.1 years                                | 832             | 0.92 (0.86-0.98) |
|                                | 5.5-7.7 years            | 1,310           | 0.31 (0.30-0.33) | 1.1-2.1 years                                | 977             | 0.86 (0.80-0.91) |
|                                | >7.7 years               | 969             | 0.37 (0.35-0.40) | >2.1 years                                   | 754             | 0.54 (0.50-0.58) |
| <b>Oesophageal cancer</b>      |                          |                 |                  |                                              |                 |                  |
|                                | 0.5-2.5 years            | 204             | 2.91 (2.52-3.33) | 0.5-0.7 years                                | 35              | 0.93 (0.65-1.29) |
|                                | 2.5-5.5 years            | 216             | 1.83 (1.60-2.09) | 0.7-1.1 years                                | 32              | 0.84 (0.57-1.18) |
|                                | 5.5-7.7 years            | 61              | 0.31 (0.24-0.40) | 1.1-2.1 years                                | 43              | 0.91 (0.66-1.23) |
|                                | >7.7 years               | 58              | 0.56 (0.42-0.72) | >2.1 years                                   | 23              | 0.41 (0.26-0.61) |
| <b>Gastric cancer</b>          |                          |                 |                  |                                              |                 |                  |
|                                | 0.5-2.5 years            | 61              | 2.89 (2.62-3.19) | 0.5-0.7 years                                | 55              | 0.73 (0.55-0.95) |
|                                | 2.5-5.5 years            | 466             | 2.00 (1.82-2.19) | 0.7-1.1 years                                | 61              | 0.78 (0.60-1.01) |
|                                | 5.5-7.7 years            | 99              | 0.26 (0.21-0.31) | 1.1-2.1 years                                | 80              | 0.82 (0.65-1.02) |
|                                | >7.7 years               | 110             | 0.45 (0.37-0.55) | >2.1 years                                   | 64              | 0.54 (0.42-0.69) |
| <b>Small bowel cancer</b>      |                          |                 |                  |                                              |                 |                  |
|                                | 0.5-2.5 years            | 96              | 2.78 (2.25-3.39) | 0.5-0.7 years                                | 22              | 0.94 (0.59-1.43) |
|                                | 2.5-5.5 years            | 109             | 1.94 (1.59-2.33) | 0.7-1.1 years                                | 20              | 0.83 (0.51-1.29) |
|                                | 5.5-7.7 years            | 26              | 0.28 (0.18-0.41) | 1.1-2.1 years                                | 25              | 0.85 (0.55-1.25) |
|                                | >7.7 years               | 22              | 0.39 (0.25-0.60) | >2.1 years                                   | 27              | 0.76 (0.50-1.11) |
| <b>Colorectal cancer</b>       |                          |                 |                  |                                              |                 |                  |
|                                | 0.5-2.5 years            | 2,658           | 2.78 (2.67-2.88) | 0.5-0.7 years                                | 540             | 0.99 (0.91-1.08) |
|                                | 2.5-5.5 years            | 2,844           | 1.79 (1.73-1.86) | 0.7-1.1 years                                | 489             | 0.86 (0.78-0.94) |

|                                             |                      |     |                  |                      |     |                  |
|---------------------------------------------|----------------------|-----|------------------|----------------------|-----|------------------|
|                                             | <i>5.5-7.7 years</i> | 813 | 0.31 (0.29-0.33) | <i>1.1-2.1 years</i> | 565 | 0.78 (0.72-0.85) |
|                                             | <i>&gt;7.7 years</i> | 604 | 0.36 (0.33-0.39) | <i>&gt;2.1 years</i> | 423 | 0.47 (0.43-0.52) |
| <b>Liver cancer</b>                         |                      |     |                  |                      |     |                  |
|                                             | <i>0.5-2.5 years</i> | 222 | 2.63 (2.30-3.00) | <i>0.5-0.7 years</i> | 63  | 1.23 (0.95-1.57) |
|                                             | <i>2.5-5.5 years</i> | 272 | 1.96 (1.74-2.21) | <i>0.7-1.1 years</i> | 53  | 1.02 (0.76-1.33) |
|                                             | <i>5.5-7.7 years</i> | 100 | 0.44 (0.35-0.53) | <i>1.1-2.1 years</i> | 70  | 1.10 (0.86-1.39) |
|                                             | <i>&gt;7.7 years</i> | 51  | 0.40 (0.30-0.53) | <i>&gt;2.1 years</i> | 46  | 0.61 (0.45-0.81) |
| <b>Gallbladder and biliary tract cancer</b> |                      |     |                  |                      |     |                  |
|                                             | <i>0.5-2.5 years</i> | 137 | 2.36 (1.98-2.79) | <i>0.5-0.7 years</i> | 42  | 1.17 (0.85-1.58) |
|                                             | <i>2.5-5.5 years</i> | 143 | 1.52 (1.28-1.79) | <i>0.7-1.1 years</i> | 51  | 1.34 (1.00-1.76) |
|                                             | <i>5.5-7.7 years</i> | 61  | 0.39 (0.30-.50)  | <i>1.1-2.1 years</i> | 52  | 1.06 (0.79-1.39) |
|                                             | <i>&gt;7.7 years</i> | 44  | 0.40 (0.29-0.53) | <i>&gt;2.1 years</i> | 45  | 0.73 (0.53-0.98) |
| <b>Pancreatic cancer</b>                    |                      |     |                  |                      |     |                  |
|                                             | <i>0.5-2.5 years</i> | 424 | 2.79 (2.53-3.06) | <i>0.5-0.7 years</i> | 107 | 1.09 (0.90-1.32) |
|                                             | <i>2.5-5.5 years</i> | 467 | 1.87 (1.71-2.06) | <i>0.7-1.1 years</i> | 123 | 1.20 (1.00-1.43) |
|                                             | <i>5.5-7.7 years</i> | 149 | 0.36 (0.30-0.42) | <i>1.1-2.1 years</i> | 136 | 1.05 (0.88-1.25) |
|                                             | <i>&gt;7.7 years</i> | 74  | 0.28 (0.23-0.37) | <i>&gt;2.1 years</i> | 124 | 0.78 (0.65-0.93) |

**Table 4: The risk of gastrointestinal cancer among aspirin and non-selective non-aspirin non-steroidal anti-inflammatory drug (NSAID) users, stratified by additional use of proton pump inhibitors (PPIs) or statins compared to the total Swedish background population, expressed as standardized incidence ratios (SIRs) and 95% confidence intervals (CIs).**

|                                             | Aspirin users (n=783,870) |                  | Aspirin with PPI (n=200,828) |                  | Aspirin with statins (n=432,996) |                  |
|---------------------------------------------|---------------------------|------------------|------------------------------|------------------|----------------------------------|------------------|
|                                             | Number of cases           | SIRS (95% CI)    | Number of cases              | SIRS (95% CI)    | Number of cases                  | SIRS (95% CI)    |
| <b>All gastrointestinal cancer</b>          | 10,969                    | 1.02 (1.00-1.04) | 3,617                        | 1.25 (1.21-2.29) | 6,210                            | 0.99 (0.96-1.01) |
| <b>Oesophageal cancer</b>                   | 539                       | 1.10 (1.01-1.19) | 247                          | 1.94 (1.71-2.20) | 299                              | 0.98 (0.87-1.09) |
| <b>Gastric cancer</b>                       | 1,079                     | 1.08 (1.01-1.14) | 509                          | 1.89 (1.73-2.06) | 619                              | 1.05 (0.98-1.13) |
| <b>Small bowel cancer</b>                   | 253                       | 1.05 (0.93-1.19) | 107                          | 1.67 (1.37-2.01) | 139                              | 0.97 (0.81-1.14) |
| <b>Colorectal cancer</b>                    | 6,919                     | 1.00 (0.98-1.03) | 2,004                        | 1.07 (1.02-1.12) | 3,893                            | 0.97 (0.94-1.00) |
| <b>Liver cancer</b>                         | 645                       | 1.11 (1.03-1.20) | 231                          | 1.52 (1.33-1.73) | 351                              | 0.99 (0.89-1.10) |
| <b>Gallbladder and biliary tract cancer</b> | 385                       | 0.92 (0.83-1.01) | 117                          | 1.00 (0.82-1.19) | 212                              | 0.90 (0.78-1.03) |
| <b>Pancreatic cancer</b>                    | 1,114                     | 1.04 (0.98-1.11) | 391                          | 1.36 (1.23-1.50) | 678                              | 1.07 (0.99-2.15) |

  

|                                             | Non-aspirin NSAIDs users (n=567,569) |                  | Non-selective non-aspirin with PPI (n=148,586) |                  | Non-selective non-aspirin with statins (n=77,514) |                  |
|---------------------------------------------|--------------------------------------|------------------|------------------------------------------------|------------------|---------------------------------------------------|------------------|
|                                             | Number of cases                      | SIRS (95% CI)    | Number of cases                                | SIRS (95% CI)    | Number of cases                                   | SIRS (95% CI)    |
| <b>All gastrointestinal cancer</b>          | 3,428                                | 0.79 (0.77-0.82) | 1,360                                          | 1.08 (1.02-1.13) | 625                                               | 0.71 (0.65-0.76) |
| <b>Oesophageal cancer</b>                   | 134                                  | 0.75 (0.63-0.89) | 67                                             | 1.36 (1.05-1.73) | 24                                                | 0.64 (0.41-0.95) |
| <b>Gastric cancer</b>                       | 260                                  | 0.70 (0.62-0.80) | 156                                            | 1.47 (1.25-1.72) | 44                                                | 0.58 (0.42-0.78) |
| <b>Small bowel cancer</b>                   | 94                                   | 0.84 (0.68-1.02) | 45                                             | 1.39 (1.02-1.87) | 14                                                | 0.64 (0.35-1.07) |
| <b>Colorectal cancer</b>                    | 2,017                                | 0.74 (0.71-0.77) | 694                                            | 0.86 (0.80-0.93) | 380                                               | 0.68 (0.61-0.75) |
| <b>Liver cancer</b>                         | 232                                  | 0.96 (0.84-1.09) | 102                                            | 1.51 (1.23-1.83) | 38                                                | 0.78 (0.55-1.07) |
| <b>Gallbladder and biliary tract cancer</b> | 190                                  | 1.03 (0.89-1.19) | 68                                             | 1.21 (0.94-1.53) | 29                                                | 0.76 (0.51-1.10) |
| <b>Pancreatic cancer</b>                    | 490                                  | 1.00 (0.92-1.10) | 222                                            | 1.55 (1.35-1.76) | 93                                                | 0.92 (0.75-1.13) |



1  
2  
3  
4  
5  
6  
7  
8  
9  
10  
11  
12  
13  
14  
15  
16  
17  
18  
19  
20  
21  
22  
23  
24  
25  
26  
27  
28  
29  
30  
31  
32  
33  
34  
35  
36  
37  
38  
39  
40  
41  
42  
43  
44  
45  
46  
47

For peer review only

## Online Supplement 1

Description of original cohort, the “Chemoprevention of Cancer” cohort, and flow-chart describing the selection of the study cohort.

For peer review only



Abbreviations: COX, cyclooxygenase; DDD, defined daily dosage; NSAIDs, non-steroidal anti-inflammatory drugs; PPIs, proton pump inhibitors

1  
2 This cohort included all individuals residing in Sweden who received at least one  
3  
4 dispensed prescription of one of the following commonly prescribed drugs between July 1,  
5  
6 2005 and December 31, 2014 (with corresponding ATC codes) with follow-up for cancer  
7  
8 until December 2012: sex hormones (G03), drugs for peptic ulcers and gastro-esophageal  
9  
10 reflux disease (A02B), acetylsalicylic acid (B01AC06, N02BA), non-steroidal anti-  
11  
12 inflammatory drugs (M01A), HMG CoA reductase inhibitors (C10AA), drugs affecting bone  
13  
14 structure and mineralization, (M05B), and antibiotics (J01AA, J01CA04, J01FA, J01MA,  
15  
16 J01XD, J01XE, J04AB04). This cohort included approximately 85% of all Swedish  
17  
18 residents, with especially high coverage of adults.  
19  
20  
21  
22  
23  
24  
25  
26  
27  
28  
29  
30  
31  
32  
33  
34  
35  
36  
37  
38  
39  
40  
41  
42  
43  
44  
45  
46  
47  
48  
49  
50  
51  
52  
53  
54  
55  
56  
57  
58  
59  
60

**Supplement 2: Year of first prescription among aspirin and non-aspirin non-steroidal anti-inflammatory drugs (NSAIDs) users during the study period.**

|              | <b>Aspirin</b> | <b>Non-aspirin NSAIDs</b> |
|--------------|----------------|---------------------------|
|              | <i>N (%)</i>   | <i>N (%)</i>              |
| 2005         | 430,391 (54.9) | 240,848 (42.5)            |
| 2006         | 79,356 (10.1)  | 143,805 (25.4)            |
| 2007         | 60,071 (7.7)   | 71,053 (12.6)             |
| 2008         | 55,527 (7.1)   | 46,013 (8.1)              |
| 2009         | 49,885 (6.4)   | 29,814 (5.3)              |
| 2010         | 43,290 (5.5)   | 18,957 (3.4)              |
| 2011         | 38,415 (4.9)   | 11,736 (2.1)              |
| 2012         | 26,935 (3.4)   | 3,983 (0.7)               |
| <b>Total</b> | <b>783,87</b>  | <b>566,209</b>            |

For peer review only

**Supplement 3: The risk of gastrointestinal cancer among maintenance users of cyclo-oxygenase-2 (COX-2) selective inhibitors and relatively selective COX-2 inhibitors, and low-dose aspirin users, presented as standardized incidence ratios (SIRs) and 95% confidence intervals (CIs).**

|                                             | COX-2 selective inhibitors      |                      | Relatively selective COX-2                |                      | Low-dose aspirin |                      |
|---------------------------------------------|---------------------------------|----------------------|-------------------------------------------|----------------------|------------------|----------------------|
|                                             | maintenance users<br>(n=17,948) |                      | inhibitors maintenance<br>users (n=7,609) |                      | (n=668,305)      |                      |
|                                             | <i>Number</i>                   |                      | <i>Number</i>                             |                      | <i>Number</i>    |                      |
|                                             | <i>of cases</i>                 | <i>SIRS (95% CI)</i> | <i>of cases</i>                           | <i>SIRS (95% CI)</i> | <i>of cases</i>  | <i>SIRS (95% CI)</i> |
| <b>Gastrointestinal cancer</b>              | 100                             | 0.89 (0.73-1.09)     | 74                                        | 0.97 (0.76-1.21)     | 9,996            | 0.86 (0.85-0.88)     |
| <b>Oesophageal cancer</b>                   | 7                               | 1.49 (0.60-3.07)     | 1                                         | -                    | 493              | 0.99 (0.91-1.08)     |
| <b>Gastric cancer</b>                       | 7                               | 0.74 (0.30-1.52)     | 4                                         | -                    | 986              | 0.94 (0.88-1.00)     |
| <b>Small bowel cancer</b>                   | 5                               | 1.72 (0.55-4.00)     | 3                                         | -                    | 224              | 0.84 (0.74-0.96)     |
| <b>Colorectal cancer</b>                    | 60                              | 0.85 (0.65-1.09)     | 50                                        | 1.02 (0.76-1.35)     | 6,338            | 0.85 (0.83-0.88)     |
| <b>Liver cancer</b>                         | 3                               | -                    | 3                                         | -                    | 592              | 0.97 (0.89-1.05)     |
| <b>Gallbladder and biliary tract cancer</b> | 5                               | 1.05 (0.34-2.44)     | 3                                         | -                    | 344              | 0.74 (0.66-0.82)     |
| <b>Pancreatic cancer</b>                    | 13                              | 1.02 (0.54-1.74)     | 10                                        | 1.15 (0.55-2.12)     | 990              | 0.80 (0.75-0.85)     |

**Supplement 4: The risk of gastrointestinal cancer among aspirin and non-selective non-aspirin non-steroidal anti-inflammatory drug (NSAID) users comparing users with non-users of additional proton pump inhibitors (PPI) or statins, calculated with Poisson Regression models and expressed as incidence rate ratios (IRR) and 95% confidence intervals (CIs).**

|                                             | Non-selective                   |                                       |                                               |                                                                  |
|---------------------------------------------|---------------------------------|---------------------------------------|-----------------------------------------------|------------------------------------------------------------------|
|                                             | Aspirin with PPI<br>vs. without | Aspirin with<br>statin vs.<br>without | non-aspirin<br>NSAIDs with<br>PPI vs. without | Non-selective non-<br>aspirin NSAIDs with<br>statins vs. without |
|                                             | <i>IRR (95% CI)</i>             | <i>IRR (95% CI)</i>                   | <i>IRR (95% CI)</i>                           | <i>IRR (95% CI)</i>                                              |
| <b>All gastrointestinal cancer</b>          | 1.19 (1.11-1.26)                | 0.81 (0.77-0.85)                      | 1.61 (1.49-1.74)                              | 0.86 (0.76-0.96)                                                 |
| <b>Oesophageal cancer</b>                   | 2.16 (1.67-2.80)                | 0.59 (0.47-0.75)                      | 2.58 (1.77-3.75)                              | 0.65 (0.32-1.31)                                                 |
| <b>Gastric cancer</b>                       | 2.26 (1.88-2.71)                | 0.81 (0.69-0.96)                      | 3.68 (2.80-4.83)                              | 0.62 (0.34-1.11)                                                 |
| <b>Small bowel cancer</b>                   | 1.65 (1.12-2.42)                | 0.65 (0.47-0.90)                      | 2.20 (1.41-3.42)                              | 0.62 (0.26-1.47)                                                 |
| <b>Colorectal cancer</b>                    | 0.98 (0.90-1.06)                | 0.85 (0.80-1.90)                      | 1.30 (1.17-1.44)                              | 0.94 (0.81-1.08)                                                 |
| <b>Liver cancer</b>                         | 1.56 (1.23-1.99)                | 0.64 (0.53-0.78)                      | 2.12 (1.59-2.82)                              | 0.79 (0.49-1.27)                                                 |
| <b>Gallbladder and biliary tract cancer</b> | 0.70 (0.49-1.02)                | 0.67 (0.52-0.86)                      | 1.28 (0.92-1.77)                              | 0.67 (0.40-1.11)                                                 |
| <b>Pancreatic cancer</b>                    | 1.32 (1.08-1.62)                | 0.90 (0.77-1.04)                      | 1.88 (1.54-2.30)                              | 0.78 (0.55-1.09)                                                 |

*Adjusted for age at first prescription, sex, and interaction between PPI and statins*

STROBE Statement—Checklist of items that should be included in reports of *cohort studies*

|                              | Item No | Recommendation                                                                                                                                                                                    | Page                          |
|------------------------------|---------|---------------------------------------------------------------------------------------------------------------------------------------------------------------------------------------------------|-------------------------------|
| <b>Title and abstract</b>    | 1       | (a) Indicate the study's design with a commonly used term in the title or the abstract                                                                                                            | p 1 & 3<br>(abstract & title) |
|                              |         | (b) Provide in the abstract an informative and balanced summary of what was done and what was found                                                                                               | p 3                           |
| <b>Introduction</b>          |         |                                                                                                                                                                                                   |                               |
| Background/rationale         | 2       | Explain the scientific background and rationale for the investigation being reported                                                                                                              | p 5-6                         |
| Objectives                   | 3       | State specific objectives, including any prespecified hypotheses                                                                                                                                  | p 6                           |
| <b>Methods</b>               |         |                                                                                                                                                                                                   |                               |
| Study design                 | 4       | Present key elements of study design early in the paper                                                                                                                                           | p 7-10                        |
| Setting                      | 5       | Describe the setting, locations, and relevant dates, including periods of recruitment, exposure, follow-up, and data collection                                                                   | p 7-10                        |
| Participants                 | 6       | (a) Give the eligibility criteria, and the sources and methods of selection of participants. Describe methods of follow-up                                                                        | p 7-10                        |
|                              |         | (b) For matched studies, give matching criteria and number of exposed and unexposed                                                                                                               | n/a                           |
| Variables                    | 7       | Clearly define all outcomes, exposures, predictors, potential confounders, and effect modifiers. Give diagnostic criteria, if applicable                                                          | p 7-10 +<br>appendix          |
| Data sources/<br>measurement | 8*      | For each variable of interest, give sources of data and details of methods of assessment (measurement). Describe comparability of assessment methods if there is more than one group              | p 7-10                        |
| Bias                         | 9       | Describe any efforts to address potential sources of bias                                                                                                                                         | p 7-10                        |
| Study size                   | 10      | Explain how the study size was arrived at                                                                                                                                                         | Fig 1                         |
| Quantitative variables       | 11      | Explain how quantitative variables were handled in the analyses. If applicable, describe which groupings were chosen and why                                                                      | p 7-10                        |
| Statistical methods          | 12      | (a) Describe all statistical methods, including those used to control for confounding                                                                                                             | p 9-10                        |
|                              |         | (b) Describe any methods used to examine subgroups and interactions                                                                                                                               | p 9-10                        |
|                              |         | (c) Explain how missing data were addressed                                                                                                                                                       | p 9-10                        |
|                              |         | (d) If applicable, explain how loss to follow-up was addressed                                                                                                                                    | n/a                           |
|                              |         | (e) Describe any sensitivity analyses                                                                                                                                                             | n/a                           |
| <b>Results</b>               |         |                                                                                                                                                                                                   |                               |
| Participants                 | 13*     | (a) Report numbers of individuals at each stage of study—eg numbers potentially eligible, examined for eligibility, confirmed eligible, included in the study, completing follow-up, and analysed | Fig 1                         |
|                              |         | (b) Give reasons for non-participation at each stage                                                                                                                                              | Fig 1                         |
|                              |         | (c) Consider use of a flow diagram                                                                                                                                                                | Fig 1                         |
| Descriptive data             | 14*     | (a) Give characteristics of study participants (eg demographic, clinical, social) and information on exposures and potential confounders                                                          | p 11, Table 1                 |
|                              |         | (b) Indicate number of participants with missing data for each variable of interest                                                                                                               | n/a                           |
|                              |         | (c) Summarise follow-up time (eg, average and total amount)                                                                                                                                       | Table 1                       |
| Outcome data                 | 15*     | Report numbers of outcome events or summary measures over time                                                                                                                                    | Tables 1-3                    |
| Main results                 | 16      | (a) Give unadjusted estimates and, if applicable, confounder-adjusted                                                                                                                             | Tables 2-4                    |



|                          |    |                                                                                                                                                                            |                   |
|--------------------------|----|----------------------------------------------------------------------------------------------------------------------------------------------------------------------------|-------------------|
|                          |    | estimates and their precision (eg, 95% confidence interval). Make clear which confounders were adjusted for and why they were included                                     |                   |
|                          |    | (b) Report category boundaries when continuous variables were categorized                                                                                                  | Table 1           |
|                          |    | (c) If relevant, consider translating estimates of relative risk into absolute risk for a meaningful time period                                                           |                   |
| Other analyses           | 17 | Report other analyses done—eg analyses of subgroups and interactions, and sensitivity analyses                                                                             | p 11-13, appendix |
| <b>Discussion</b>        |    |                                                                                                                                                                            |                   |
| Key results              | 18 | Summarise key results with reference to study objectives                                                                                                                   | p 14              |
| Limitations              | 19 | Discuss limitations of the study, taking into account sources of potential bias or imprecision. Discuss both direction and magnitude of any potential bias                 | p 14-17           |
| Interpretation           | 20 | Give a cautious overall interpretation of results considering objectives, limitations, multiplicity of analyses, results from similar studies, and other relevant evidence | p 14-17           |
| Generalisability         | 21 | Discuss the generalisability (external validity) of the study results                                                                                                      | p 14-17           |
| <b>Other information</b> |    |                                                                                                                                                                            |                   |
| Funding                  | 22 | Give the source of funding and the role of the funders for the present study and, if applicable, for the original study on which the present article is based              | p 3, p 17         |

\*Give information separately for exposed and unexposed groups.

**Note:** An Explanation and Elaboration article discusses each checklist item and gives methodological background and published examples of transparent reporting. The STROBE checklist is best used in conjunction with this article (freely available on the Web sites of PLoS Medicine at <http://www.plosmedicine.org/>, Annals of Internal Medicine at <http://www.annals.org/>, and Epidemiology at <http://www.epidem.com/>). Information on the STROBE Initiative is available at <http://www.strobe-statement.org>.
