# Supplementary material for: Maintenance use of non-steroidal anti-inflammatory drugs and risk of gastrointestinal cancer in a nationwide population-based cohort study in Sweden
Source: PubMed Central journal article supplement — BMJ Open. 2018 Jul 7;8(7):e021869. doi: 10.1136/bmjopen-2018-021869 (PMC6042574; doi:10.1136/bmjopen-2018-021869), 2018-07-07
Supplement: bmjopen-2018-021869supp002.pdf [file bmjopen-2018-021869supp002.pdf]

**Supplement 2: Year of first prescription among aspirin and non-aspirin non-steroidal anti-inflammatory drugs (NSAIDs) users during the study period.**

|              | <b>Aspirin</b> | <b>Non-aspirin NSAIDs</b> |
|--------------|----------------|---------------------------|
|              | <i>N (%)</i>   | <i>N (%)</i>              |
| 2005         | 430,391 (54.9) | 240,848 (42.5)            |
| 2006         | 79,356 (10.1)  | 143,805 (25.4)            |
| 2007         | 60,071 (7.7)   | 71,053 (12.6)             |
| 2008         | 55,527 (7.1)   | 46,013 (8.1)              |
| 2009         | 49,885 (6.4)   | 29,814 (5.3)              |
| 2010         | 43,290 (5.5)   | 18,957 (3.4)              |
| 2011         | 38,415 (4.9)   | 11,736 (2.1)              |
| 2012         | 26,935 (3.4)   | 3,983 (0.7)               |
| <b>Total</b> | <b>783,87</b>  | <b>566,209</b>            |
